# Supplementary material
Source: PubMed Central journal article supplement (PMC6643929)
Supplement: ao7b00688_si_001.pdf [file ao7b00688_si_001.pdf]

## Supporting Information

# Potent Anticancer Activity with High Selectivity of a chiral Palladium N-heterocyclic Carbene Complex

Anuj Kumar,<sup>†,‡</sup> Afsana Naaz,<sup>§,‡</sup> A. P. Prakasham,<sup>†</sup> Manoj Kumar Gangwar,<sup>†</sup> Raymond J.  
Butcher,<sup>‡</sup> Dulal Panda,<sup>\*,§</sup> and Prasenjit Ghosh<sup>\*,†</sup>

<sup>†</sup>Department of Chemistry,  
Indian Institute of Technology Bombay,  
Powai, Mumbai, 400 076, India

<sup>§</sup>Department of Biosciences and Bioengineering,  
Indian Institute of Technology Bombay,  
Powai, Mumbai, 400 076, India

<sup>‡</sup>Department of Chemistry,  
Howard University,  
Washington DC, USA 20059

<sup>‡</sup> AK and AN contributed equally to this work

Email: [pghosh@chem.iitb.ac.in](mailto:pghosh@chem.iitb.ac.in), [panda@iitb.ac.in](mailto:panda@iitb.ac.in)

Fax: +91 22 2572 3480

Current Affiliation: AK: Department of Chemistry, University of Delhi, Delhi, 110007, India.

MKG: Department of Chemistry, IIT Kanpur, Kanpur, 208016, India.

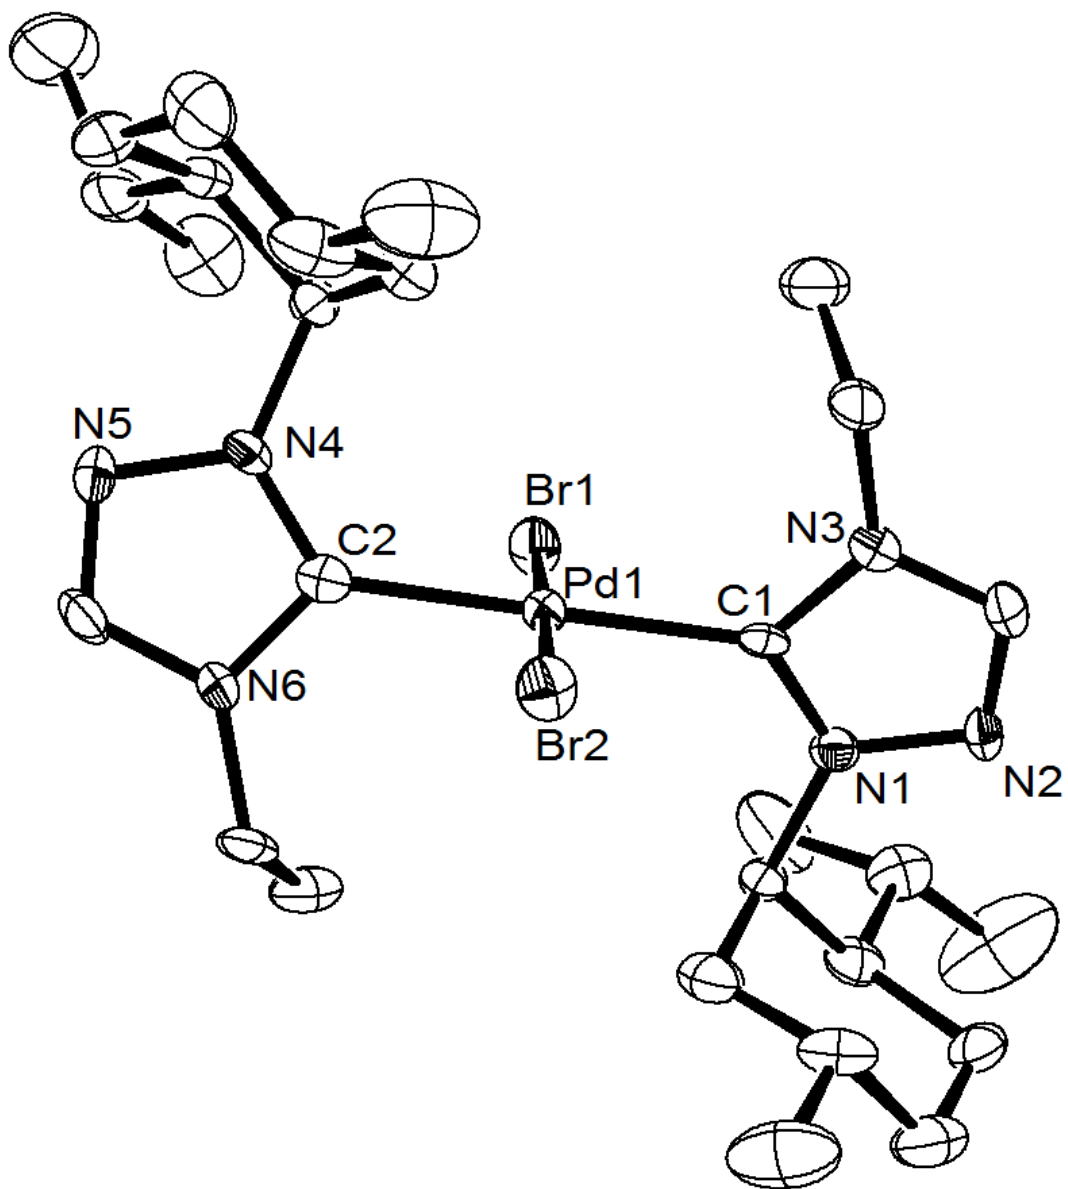

**Figure S1.** ORTEP of *1R,2R,5S-1b* with thermal ellipsoids are shown at the 50 % probability level. Selected bond lengths (Å) and angles (°): Pd(1)–C(1) 2.025(3), Pd(1)–C(2) 2.020(3), Pd(1)–Br(1) 2.4352(7), Pd(1)–Br(2) 2.4551(7), C(1)–Pd(1)–C(2) 179.41(15), Br(1)–Pd(1)–Br(2) 177.984(17), C(1)–Pd(1)–Br(2) 91.57(10), C(1)–Pd(1)–Br(1) 90.02(10).

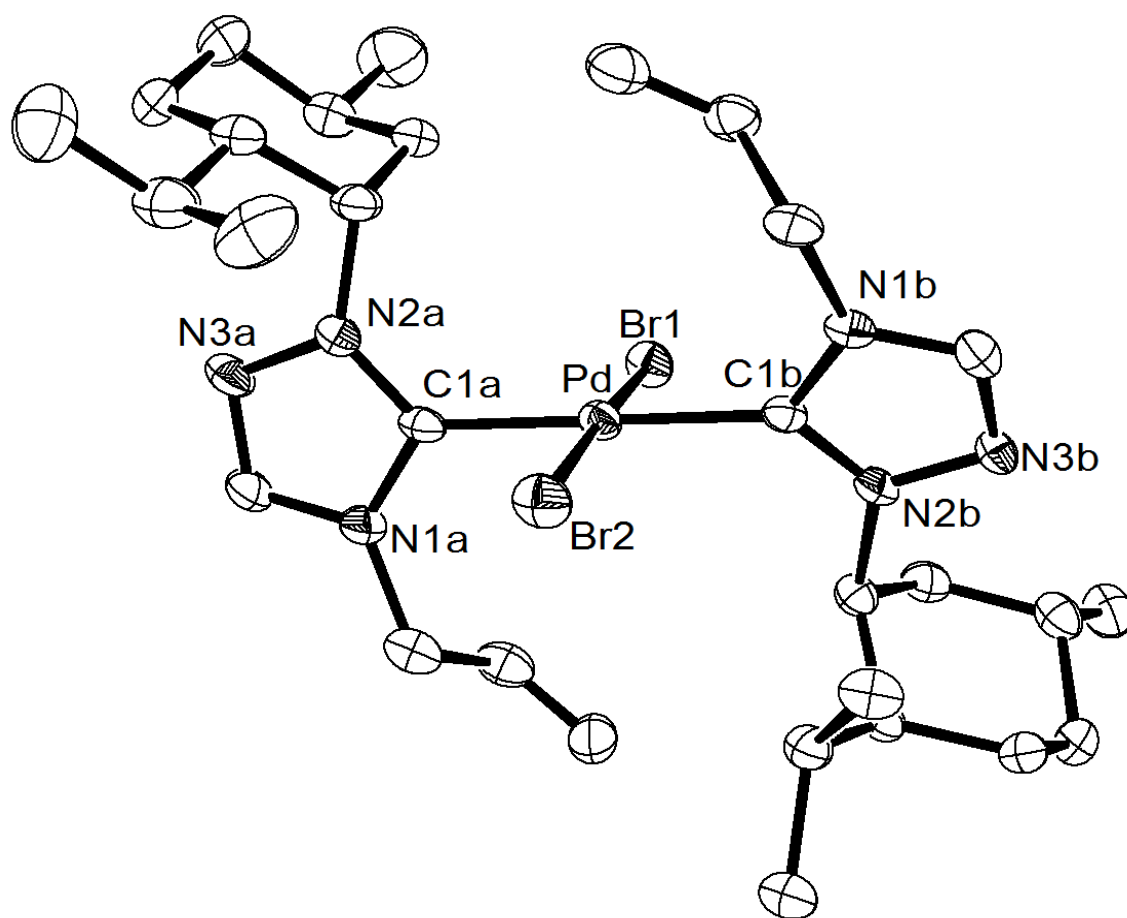

**Figure S2.** ORTEP of *1S,2S,5R-2b* with thermal ellipsoids are shown at the 50 % probability level. Selected bond lengths (Å) and angles (°): Pd–C(1a) 2.008(6), Pd–C(1b) 2.028(5), Pd–Br(1) 2.4479(9), Pd–Br(2) 2.4319(10), C(1a)–Pd–C(1b) 179.2(2), Br(1)–Pd–Br(2) 175.32(5), C(1a)–Pd–Br(2) 89.72(15), C(1b)–Pd–Br(1) 90.24(15).

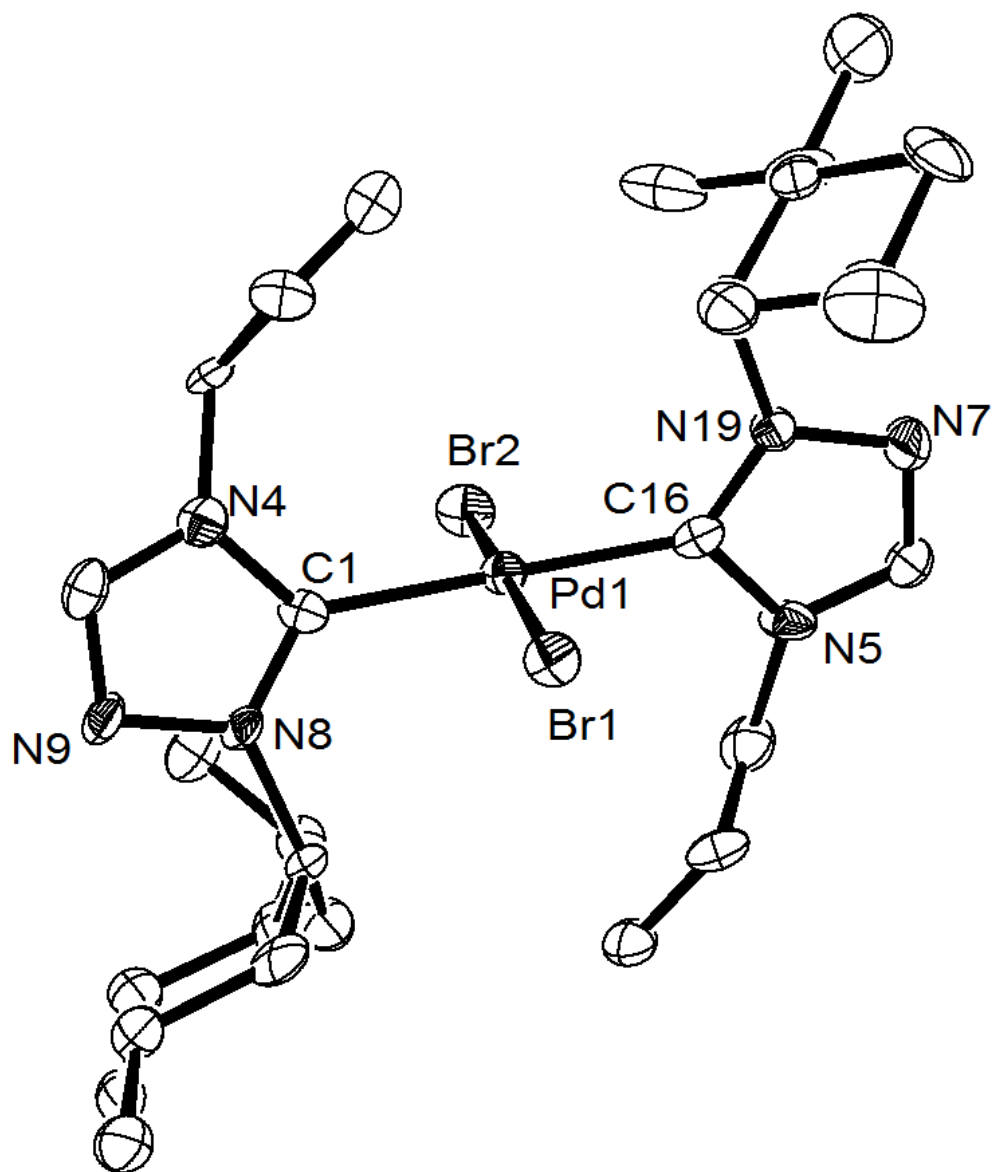

**Figure S3.** ORTEP of *1R,2R,5S-2b* with thermal ellipsoids are shown at the 50 % probability level. Selected bond lengths (Å) and angles (°): Pd(1)–C(1) 2.049(11), Pd(1)–C(16) 2.012(12), Pd(1)–Br(1) 2.4369(15), Pd(1)–Br(2) 2.4446(15), C(1)–Pd(1)–C(16) 178.8(5), Br(1)–Pd(1)–Br(2) 175.39(7), C(1)–Pd(1)–Br(2) 90.9(3), C(1)–Pd(1)–Br(1) 90.1(3).

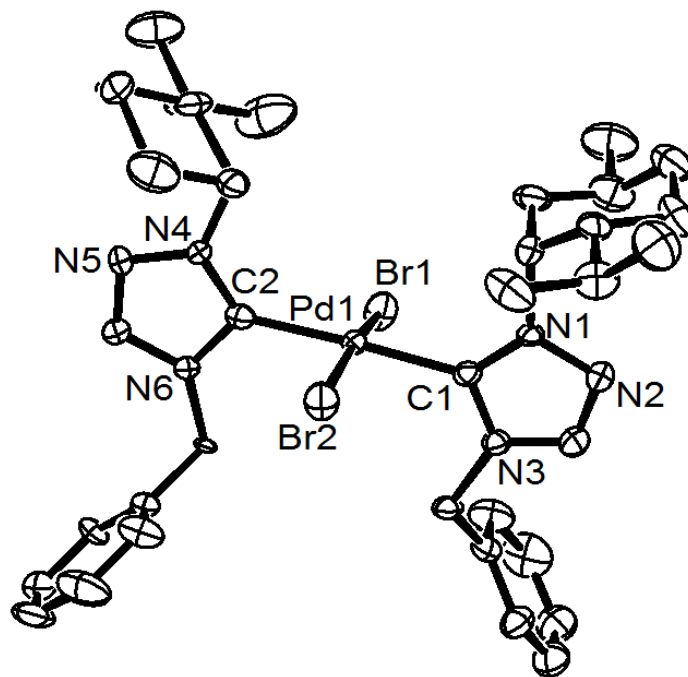

**Figure S4.** ORTEP of *1R,2R,5S-3b* with thermal ellipsoids are shown at the 50 % probability level. Selected bond lengths (Å) and angles (°): Pd(1)–C(1) 2.018(9), Pd(1)–C(2) 2.022(9), Pd(1)–Br(1) 2.4354(12), Pd(1)–Br(2) 2.4370(12), C(1)–Pd(1)–C(2) 177.5(5), Br(1)–Pd(1)–Br(2) 169.51(5), C(1)–Pd(1)–Br(2) 91.3(3), C(1)–Pd(1)–Br(1) 87.8(3).

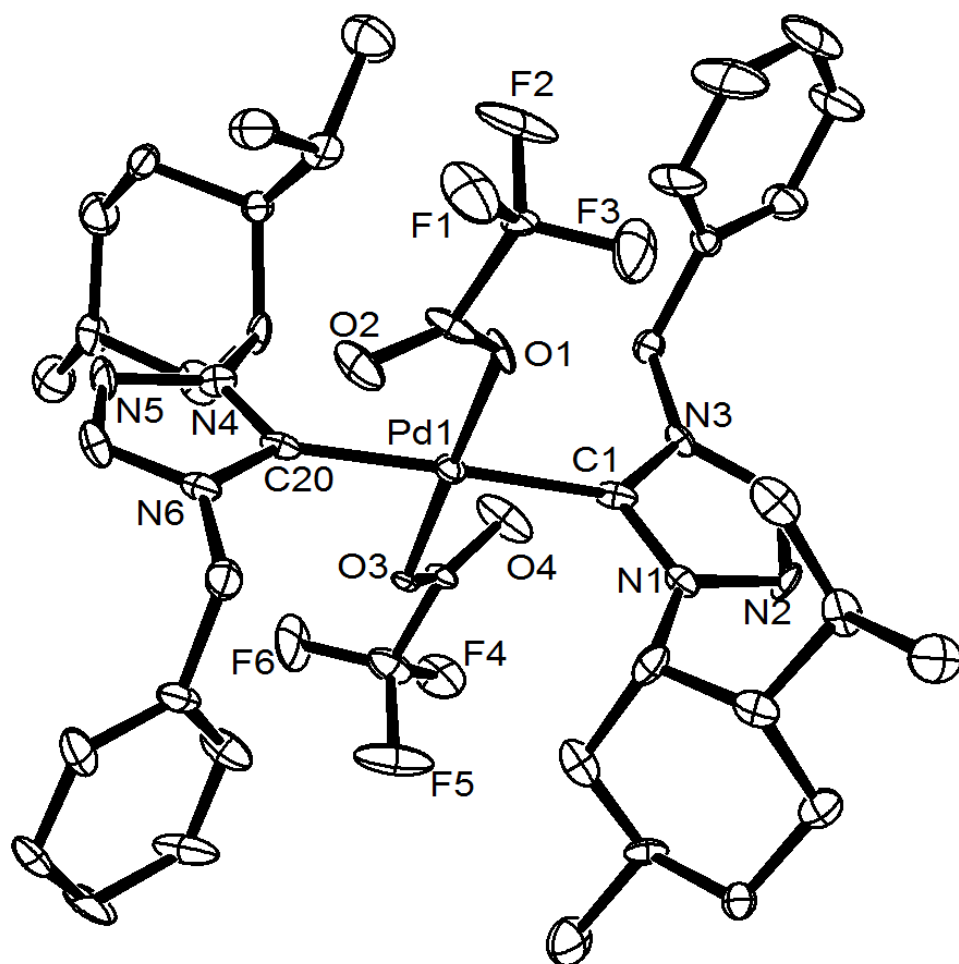

**Figure S5.** ORTEP of *1S,2S,5R-3c* with thermal ellipsoids are shown at the 50 % probability level. Selected bond lengths (Å) and angles (°): Pd(1)–C(1) 2.022(10), Pd(1)–C(20) 2.028(10), Pd(1)–O(1) 2.006(6), Pd(1)–O(3) 2.017(6), C(1)–Pd(1)–C(20) 176.8(5), O(1)–Pd(1)–O(3) 179.1(4), C(1)–Pd(1)–O(1) 87.0(4), C(20)–Pd(1)–O(3) 85.0(3).

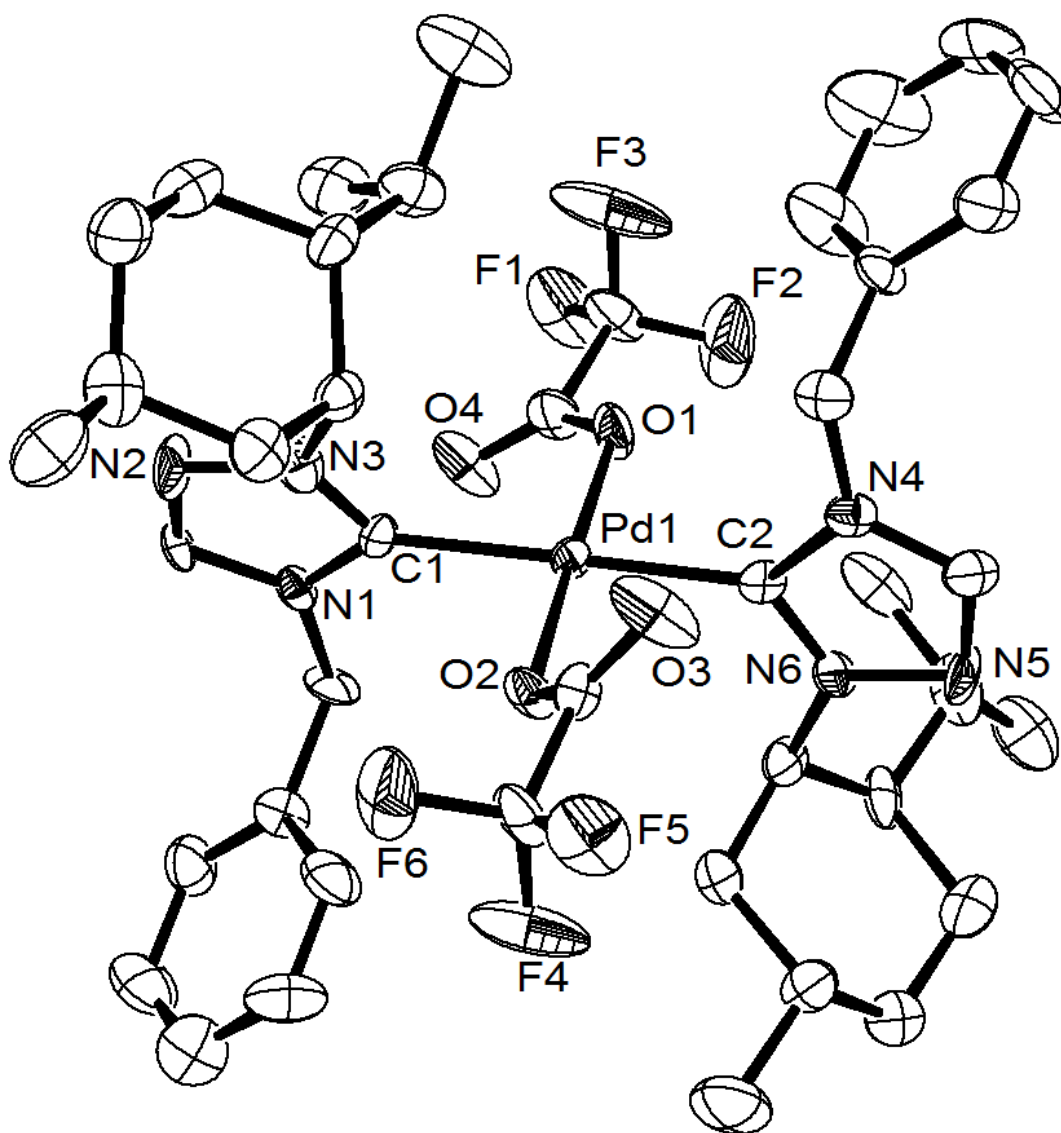

**Figure S6.** ORTEP of *1R,2R,5S-3c* with thermal ellipsoids are shown at the 50 % probability level. Selected bond lengths (Å) and angles (°): Pd(1)–C(1) 2.033(8), Pd(1)–C(2) 2.020(8), Pd(1)–O(1) 2.022(5), Pd(1)–O(2) 2.021(5), C(1)–Pd(1)–C(2) 176.7(3), O(1)–Pd(1)–O(2) 178.7(3), C(1)–Pd(1)–O(1) 95.3(3), C(2)–Pd(1)–O(2) 91.3(3).

PG-AK-11-216-1-1H

NAME PG-AK-11-216-1-1H  
EXPNO 11  
PROCNO 1  
Date\_ 20151007  
Time 17.18  
INSTRUM spect  
PROBHD 5 mm PABBO BB-  
PULPROG zg30  
TD 54274  
SOLVENT CDCl3  
NS 8  
DS 0  
SWH 8223.685 Hz  
FIDRES 0.151522 Hz  
AQ 3.2999091 sec  
RG 71.8  
DW 60.800 usec  
DE 6.50 usec  
TE 297.8 K  
D1 1.0000000 sec  
TD0 1

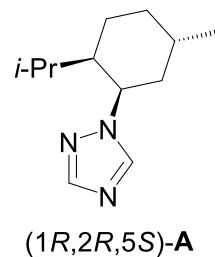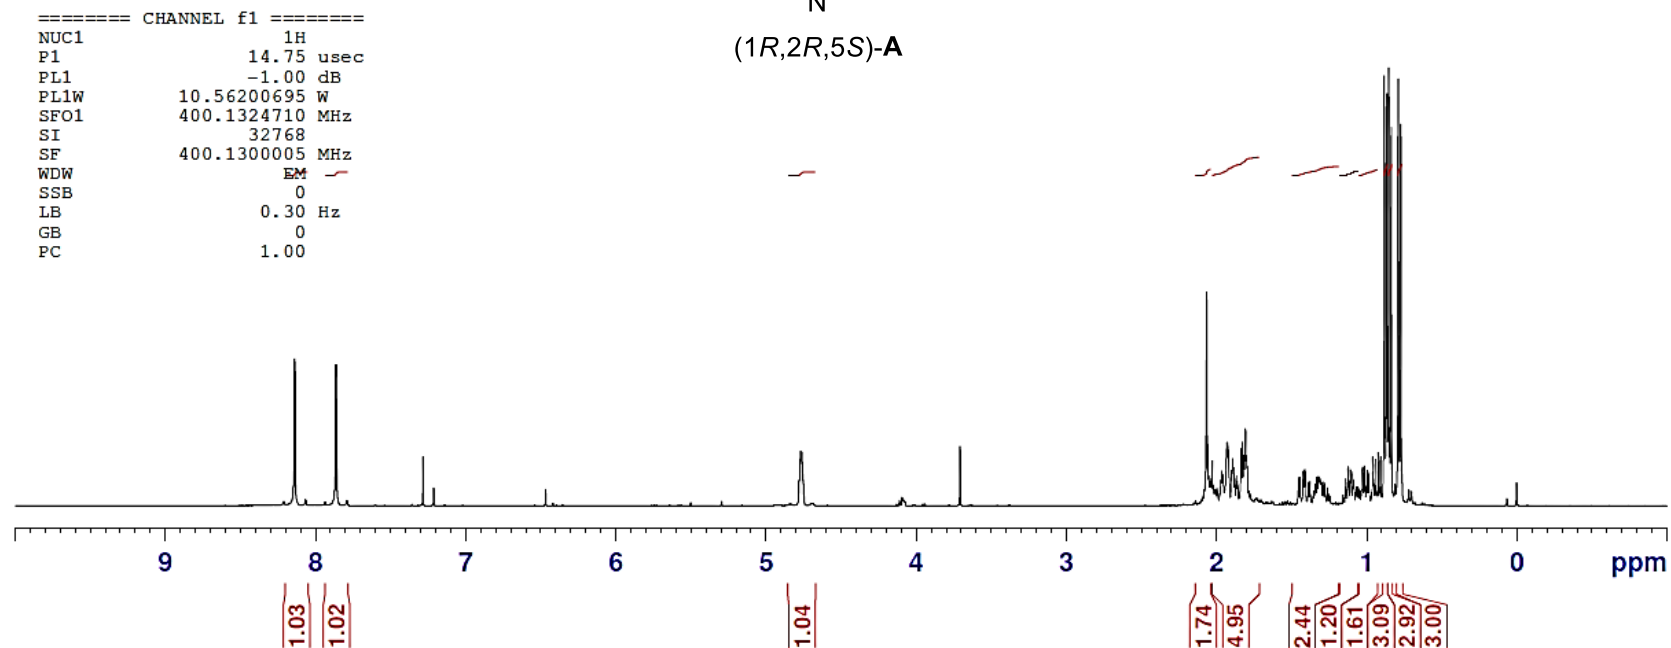

Figure S7. <sup>1</sup>H NMR spectrum of 1R,2R,5S-A in CDCl<sub>3</sub>.



PG-AK-11-216-1-13C

Current Data Parameters  
NAME PG-AK-11-216-1-13C  
EXPNO 2  
PROCNO 1

F2 - Acquisition Parameters  
Date\_ 20160301  
Time\_ 22.47  
INSTRUM spect  
PROBHD 5 mm PABBO BB/  
PULPROG zgpg30  
TD 65536  
SOLVENT CDC13  
NS 100  
DS 4  
SWH 29761.904 Hz  
FIDRES 0.454131 Hz  
AQ 1.1010048 sec  
RG 197.27  
DW 16.800 usec  
DE 6.50 usec  
TE 296.4 K  
D1 1.00000000 sec  
D11 0.03000000 sec  
TD0 1

=====  
CHANNEL f1  
SFO1 125.7703637 MHz  
NUC1 13C  
P1 8.90 usec  
PLW1 103.00000000 W

=====  
CHANNEL f2  
SFO2 500.1320005 MHz  
NUC2 1H  
PCPD2 waltz16  
PCPD2 80.00 usec  
PLW2 13.00000000 W  
PLW12 0.34327999 W  
PLW13 0.21969999 W

F2 - Processing parameters  
SI 32768  
SF 125.7577707 MHz  
WDW EM  
SSB 0  
LB 1.00 Hz  
GB 0  
PC 1.40

151.06  
143.63

77.46  
77.20  
76.95

58.12

46.78

41.13

34.87

29.24

26.62

25.11

22.42

21.21

20.61

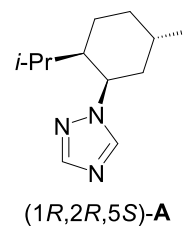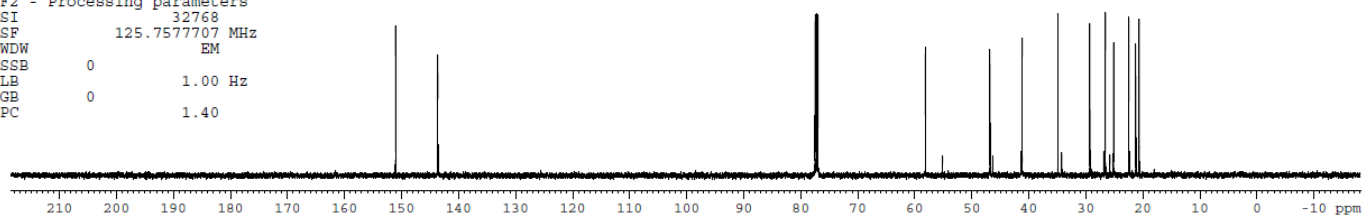

Figure S8.  $^{13}\text{C}\{^1\text{H}\}$  NMR spectrum of 1*R*,2*R*,5*S*-A in  $\text{CDCl}_3$ .

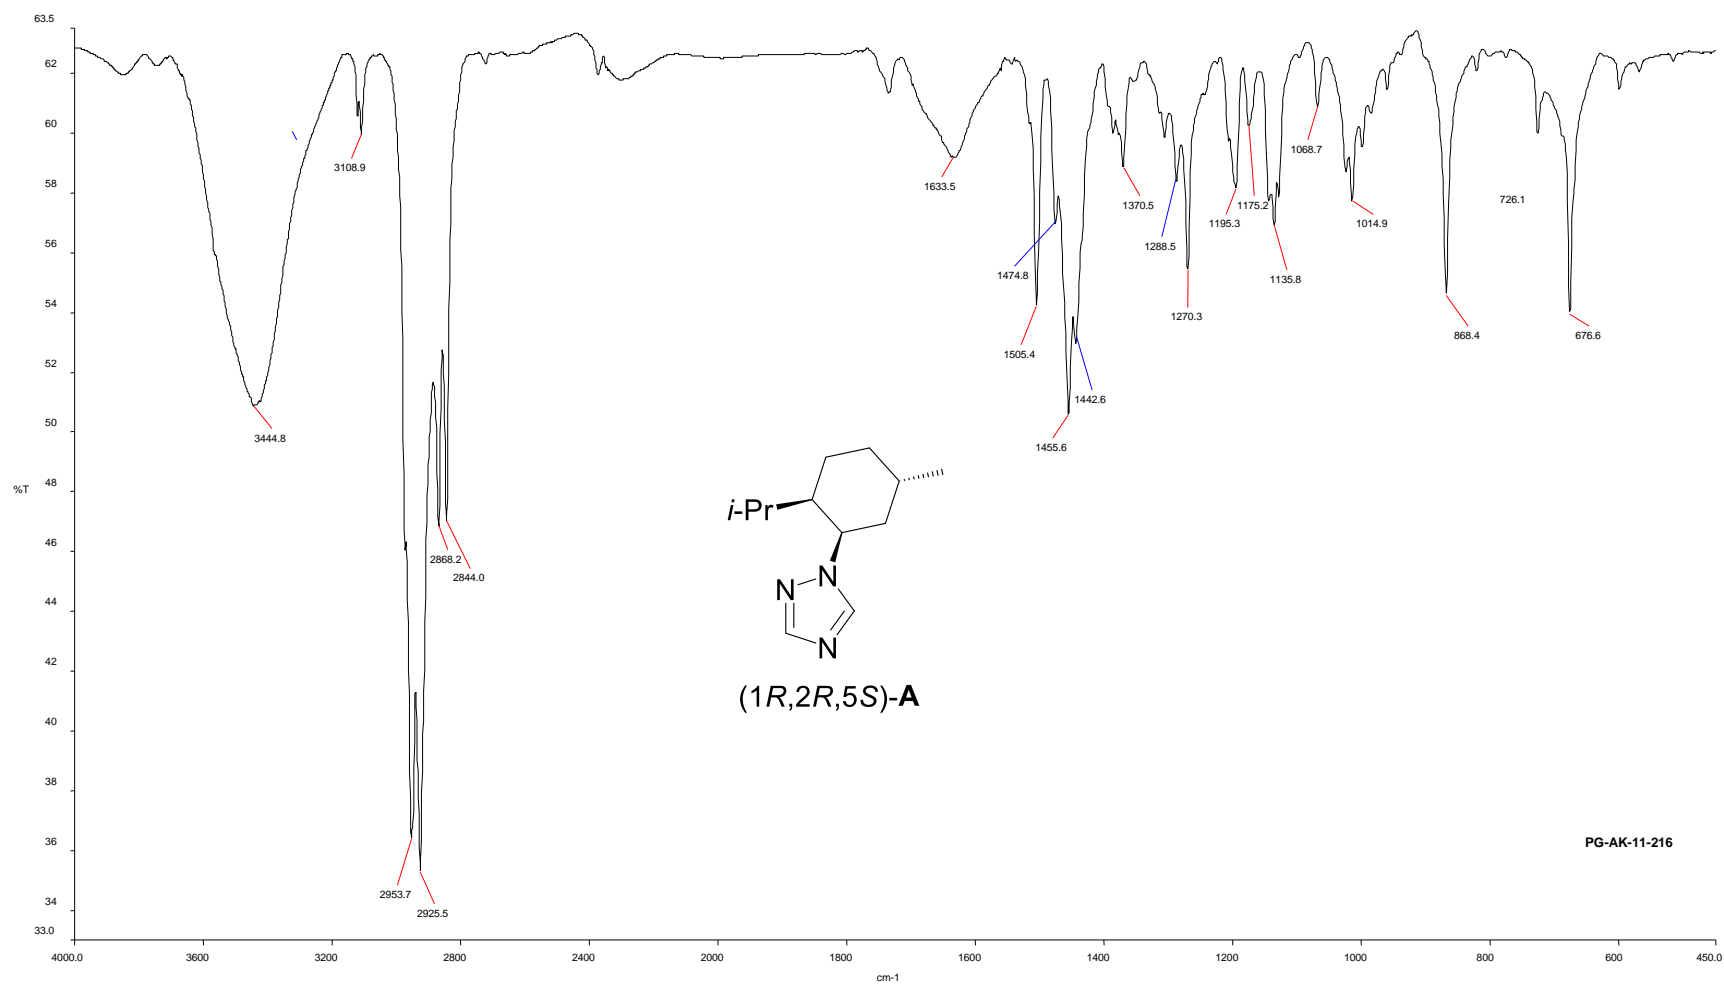

**Figure S9.** Infrared spectrum of 1R,2R,5S-A in KBr.

DEPARTMENT OF CHEMISTRY, I.I.T.(B)

|                      |                                 |                                       |                           |
|----------------------|---------------------------------|---------------------------------------|---------------------------|
| <b>Analysis Info</b> |                                 | Acquisition Date 2/29/2016 8:22:45 PM |                           |
| Analysis Name        | D:\Data\FEB-2016\PG-AK-11-216.d | Operator                              | PFG APP IN                |
| Method               | Tune_pos_NAICSI-1000a.m         | Instrument                            | maXis impact 282001.00081 |
| Sample Name          | PG-AK-11-216                    |                                       |                           |
| Comment              | C12H21N3                        |                                       |                           |

**Acquisition Parameter**

|             |         |                       |            |                  |           |
|-------------|---------|-----------------------|------------|------------------|-----------|
| Source Type | ESI     | Ion Polarity          | Positive   | Set Nebulizer    | 0.3 Bar   |
| Focus       | Active  | Set Capillary         | 3700 V     | Set Dry Heater   | 180 °C    |
| Scan Begin  | 50 m/z  | Set End Plate Offset  | -500 V     | Set Dry Gas      | 4.0 l/min |
| Scan End    | 400 m/z | Set Collision Cell RF | 1200.0 Vpp | Set Divert Valve | Source    |

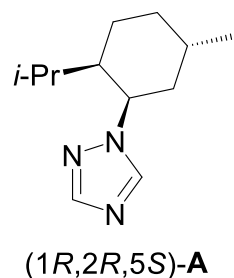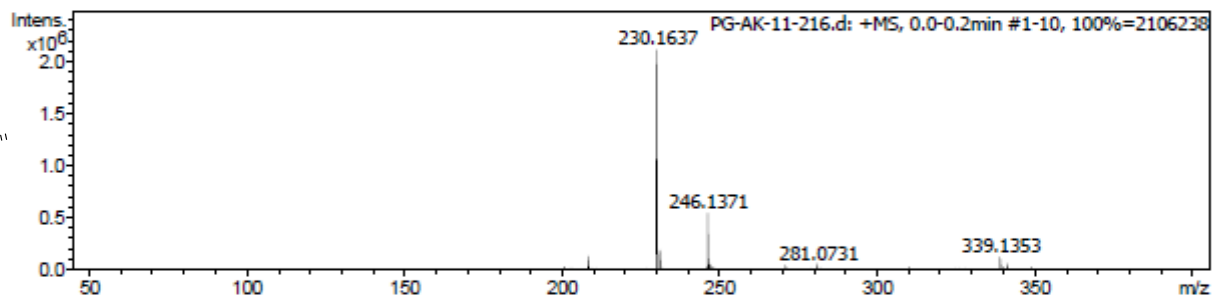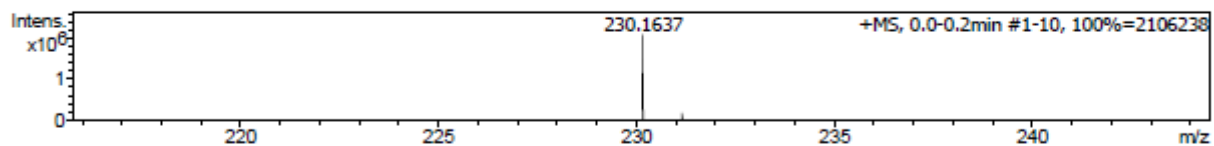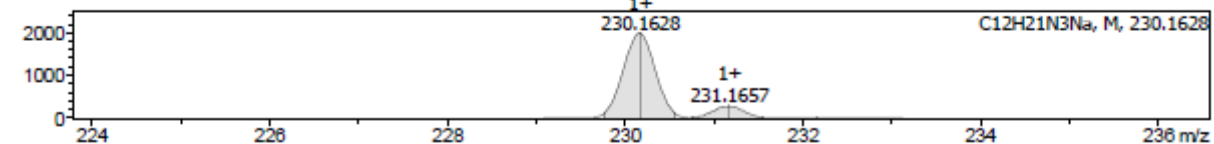

| Meas. m/z | # | Ion Formula | m/z      | err [ppm] | mSigma | # Sigma | Score  | rdb | e <sup>-</sup> Conf | N-Rule |
|-----------|---|-------------|----------|-----------|--------|---------|--------|-----|---------------------|--------|
| 230.1637  | 1 | C12H21N3Na  | 230.1628 | 3.9       | 31.2   | 2       | 100.00 | 3.5 | even                | ok     |

**Figure S10.** High Resolution Mass Spectrometry (HRMS) data of 1R,2R,5S-A.

# Eager 300 Report

Page: 1 Sample: PG-AK-11-216-1 (PG-AK-11-216-1)

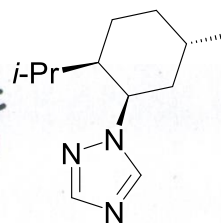

Method Name : PGCP13102015  
Method File : D:\CHNS-2015\PGCP13102015.mth  
Chromatogram : PG-AK-11-216-1  
Operator ID : CHANDNI  
Analysed : 10/13/2015 15:28  
Sample ID : PG-AK-11-216-1 (# 22)  
Analysis Type : UnkNown (Area)

Company Name : C.E. Instruments  
Printed : 10/13/2015 18:36  
Instrument N. : Instrument #1  
Sample weight : .881

Calib. method : using 'K Factors'

!!! Warning missing one or more peaks.

| Element Name | %       | Ret. Time | Area    | BC | Area ratio | K factor    |
|--------------|---------|-----------|---------|----|------------|-------------|
| Nitrogen     | 19.3771 | 40        | 184872  | FU | 8.597494   | .108295E+07 |
| Carbon       | 69.0840 | 63        | 1589435 | FU | 1.000000   | .260680E+07 |
| Hydrogen     | 9.9775  | 178       | 599593  | RS | 2.650857   | .665180E+07 |
| Totals       | 98.4386 |           | 2373900 |    |            |             |

Figure S11. Elemental analysis data of (1R,2R,5S)-A.

**CENTRAL FACILITY LAB CHEMISTRY DEPT. IIT MUMBAI**

Monday, 30-NOV-2015

This sample was measured on an Autopol IV, Serial #82083  
Manufactured by Rudolph Research Analytical, Hackettstown, NJ, USA.

Lot ID : pg

Set Temperature : 25.0

Time Delay : Disabled

Temperature Correction : OFF

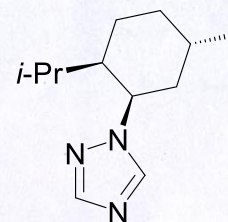

**(1R,2R,5S)-A**

| <u>n</u> | <u>Average</u> | <u>Std.Dev.</u> | <u>Maximum</u> | <u>Minimum</u> |
|----------|----------------|-----------------|----------------|----------------|
| 5        | -40.941        | 0.0822          | -40.851        | -41.001        |

| <u>S.No</u> | <u>Sample ID</u> | <u>Time</u> | <u>Result</u> | <u>Scale</u> | <u>OR °Arc</u> | <u>WLG</u> | <u>Lg.mm</u> | <u>Conc.</u> | <u>Temp.</u> |
|-------------|------------------|-------------|---------------|--------------|----------------|------------|--------------|--------------|--------------|
| 1           | pg-ak-11-216-a2  | 16:53:19    | -41.001       | SR           | -0.205         | 589        | 50           | 1            | 24.8         |
| 2           | pg-ak-11-216-a2  | 16:53:26    | -41.001       | SR           | -0.205         | 589        | 50           | 1            | 24.8         |
| 3           | pg-ak-11-216-a2  | 16:53:33    | -41.001       | SR           | -0.205         | 589        | 50           | 1            | 24.8         |
| 4           | pg-ak-11-216-a2  | 16:53:42    | -40.851       | SR           | -0.204         | 589        | 50           | 1            | 24.8         |
| 5           | pg-ak-11-216-a2  | 16:53:49    | -40.851       | SR           | -0.204         | 589        | 50           | 1            | 24.9         |

**Figure S12.** Specific rotation of (1R,2R,5S)-A in CHCl<sub>3</sub>.

PG-AK-11-219-1-1H

NAME PG-AK-11-219-1-1H  
EXPNO 1  
PROCNO 1  
Date\_ 20151008  
Time 22.40  
INSTRUM spect  
PROBHD 5 mm PABBO BB-  
PULPROG zg30  
TD 54274  
SOLVENT CDCl3  
NS 9  
DS 0  
SWH 8223.685 Hz  
FIDRES 0.151522 Hz  
AQ 3.2999091 sec  
RG 144  
DW 60.800 usec  
DE 6.50 usec  
TE 297.4 K  
D1 1.00000000 sec  
TD0 1

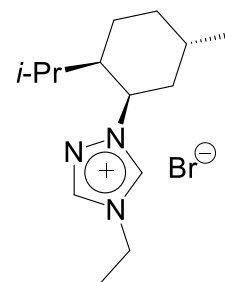

(1R,2R,5S)-1a

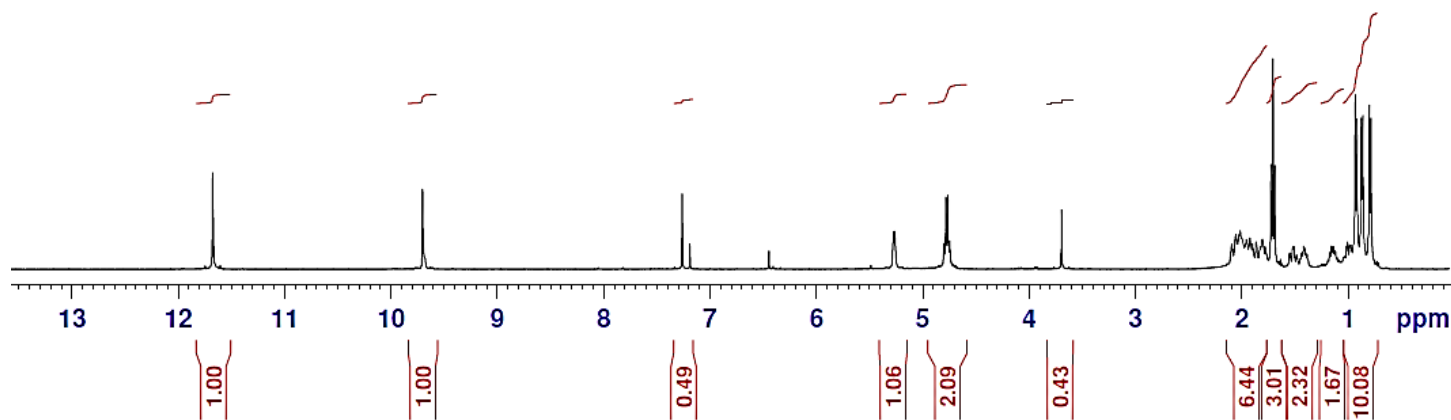

Figure S13.  $^1\text{H}$  NMR spectrum of (1R,2R,5S)-1a in  $\text{CDCl}_3$ .

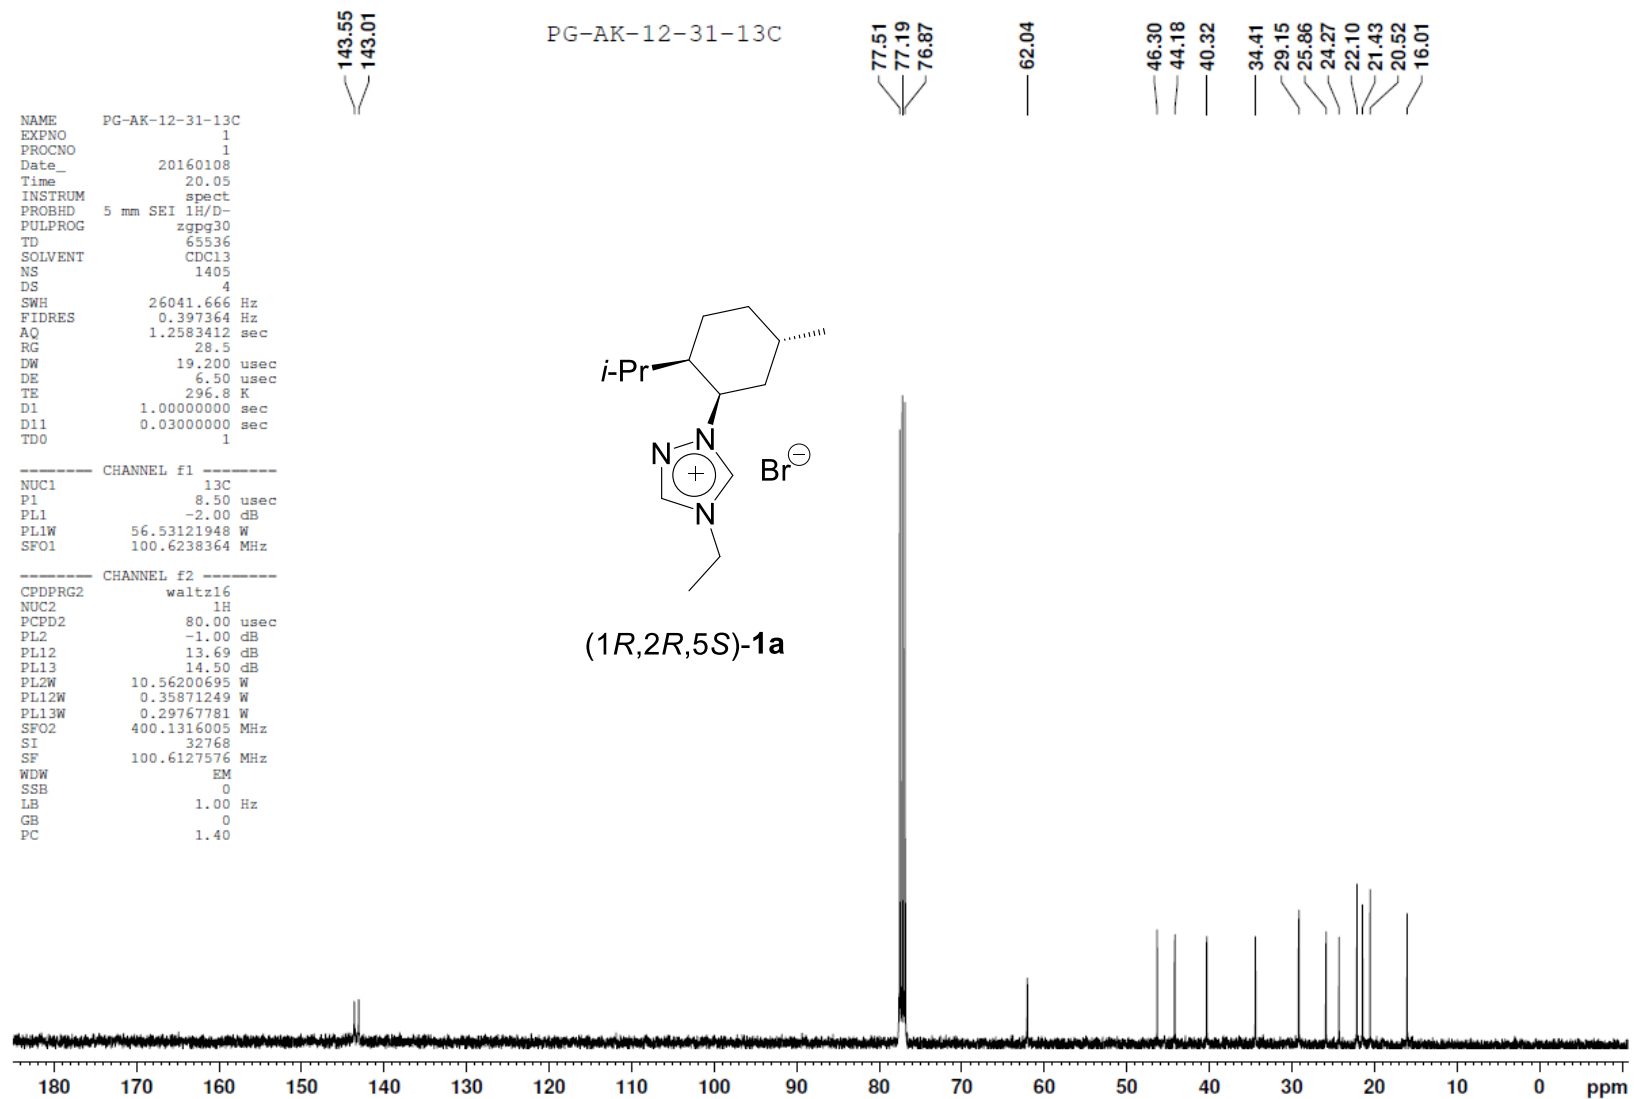

Figure S14.  $^{13}\text{C}\{^1\text{H}\}$  NMR spectrum of 1*R*,2*R*,5*S*-1a in  $\text{CDCl}_3$ .

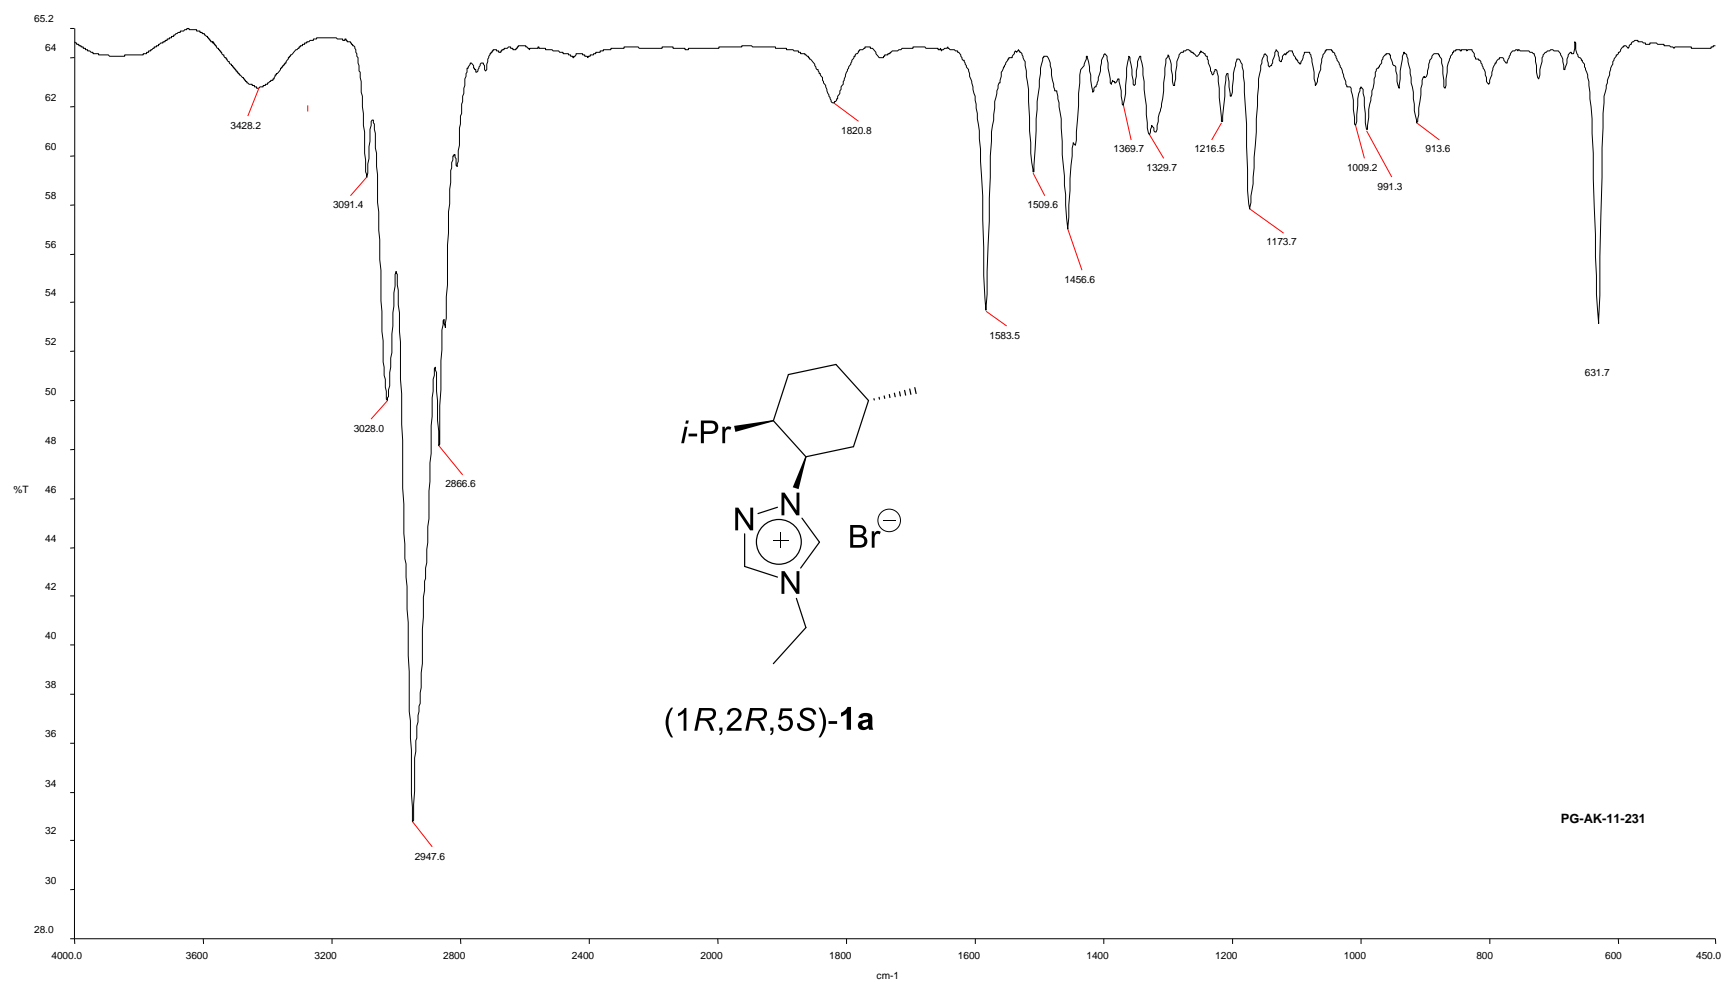

**Figure S15.** Infrared spectrum of 1R,2R,5S-1a in KBr.



DEPARTMENT OF CHEMISTRY, I.I.T.(B)

Analysis Info

Analysis Name D:\Data\FEB-2016\PG-AK-11-231.d  
 Method Tune\_pos\_NAICSI-1000a.m  
 Sample Name PG-AK-11-231  
 Comment C14H26N3Br

Acquisition Date 2/29/2016 8:32:51 PM

Operator PFG APP IN  
 Instrument maXis impact 282001.00081

Acquisition Parameter

Source Type ESI Ion Polarity Positive Set Nebulizer 0.3 Bar  
 Focus Active Set Capillary 3700 V Set Dry Heater 180 °C  
 Scan Begin 50 m/z Set End Plate Offset -500 V Set Dry Gas 4.0 l/min  
 Scan End 500 m/z Set Collision Cell RF 1200.0 Vpp Set Divert Valve Source

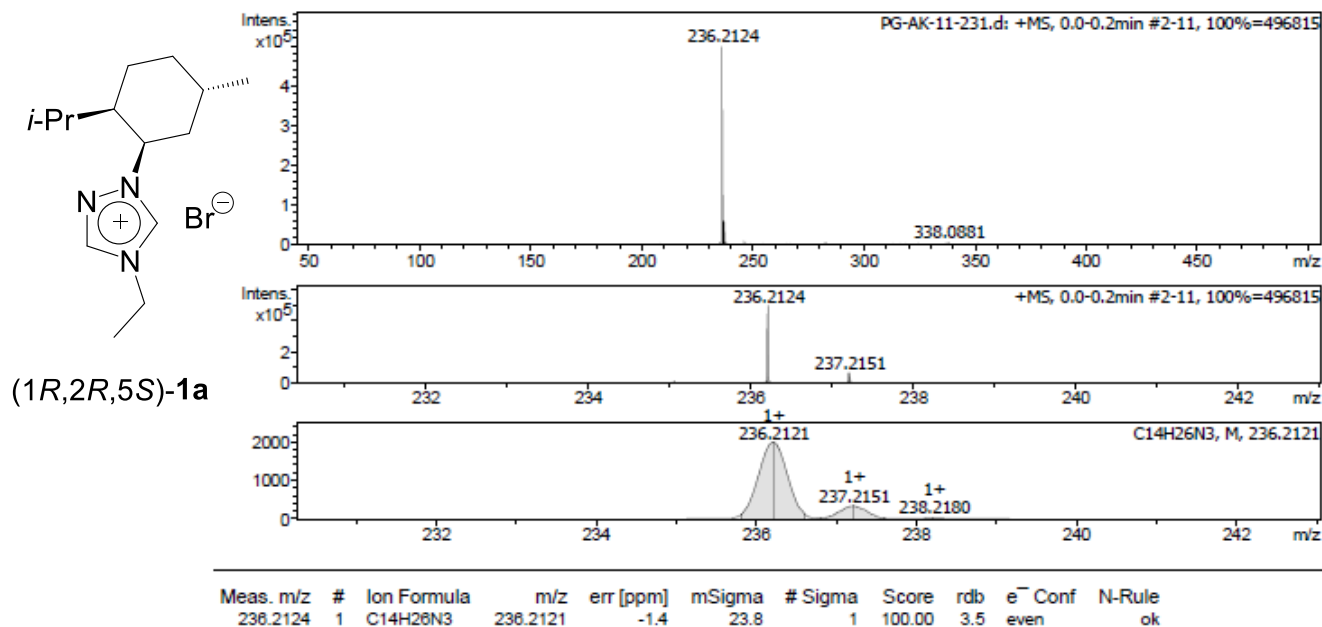

Figure S16. High Resolution Mass Spectrometry (HRMS) data of 1R,2R,5S-1a.

# Eager 300 Report

Page: 1    Sample: PG-AK-11-231-2 (PG-AK-11-231-2)

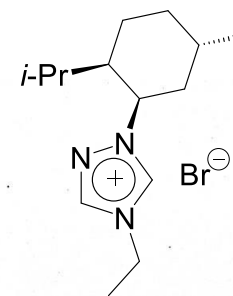

|                                             |                                 |
|---------------------------------------------|---------------------------------|
| Method Name : PGCP26102015                  | Company Name : C.E. Instruments |
| Method File : D:\CHNS-2015\PGCP26102015.mth | Printed : 10/30/2015 09:57      |
| Chromatogram : PG-AK-11-231-2               | Instrument N. : Instrument #1   |
| Operator ID : CHANDNI                       | Sample weight : .788            |
| Analysed : 10/26/2015 12:13                 |                                 |
| Sample ID : PG-AK-11-231-2 (# 7)            |                                 |
| Analysis Type : UnkNown (Area)              |                                 |

Calib. method : using 'K Factors'

!!! Warning missing one or more peaks.

| Element Name | %       | Ret. Time | Area    | BC | Area ratio | K factor    |
|--------------|---------|-----------|---------|----|------------|-------------|
| Nitrogen     | 13.2688 | 41        | 121875  | RS | 9.069481   | .116562E+07 |
| Carbon       | 53.9449 | 65        | 1105343 | RS | 1.000000   | .260028E+07 |
| Hydrogen     | 8.3895  | 178       | 446363  | RS | 2.476332   | .655078E+07 |
| Totals       | 75.6032 |           | 1673581 |    |            |             |

Figure S17. Elemental analysis data of (1R,2R,5S)-1a.

**CENTRAL FACILITY LAB CHEMISTRY DEPT. IIT MUMBAI**

Tuesday, 27-OCT-2015

This sample was measured on an Autopol IV, Serial #82083  
Manufactured by Rudolph Research Analytical, Hackettstown, NJ, USA.

Lot ID : pg

Set Temperature : 25.0

Time Delay : Disabled

Temperature Correction : OFF

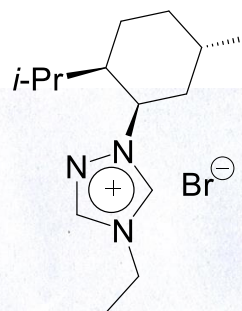

**(1R,2R,5S)-1a**

| <u>n</u>    | <u>Average</u>   | <u>Std.Dev.</u> | <u>Maximum</u> | <u>Minimum</u> |                |            |              |              |              |
|-------------|------------------|-----------------|----------------|----------------|----------------|------------|--------------|--------------|--------------|
| 5           | -21.972          | 0.1866          | -21.820        | -22.277        |                |            |              |              |              |
| <u>S.No</u> | <u>Sample ID</u> | <u>Time</u>     | <u>Result</u>  | <u>Scale</u>   | <u>OR °Arc</u> | <u>WLG</u> | <u>Lg.mm</u> | <u>Conc.</u> | <u>Temp.</u> |
| 1           | pg-ak-11-231-1   | 17:28:17        | -21.972        | SR             | -0.110         | 589        | 50.00        | 1.000        | 24.9         |
| 2           | pg-ak-11-231-1   | 17:28:24        | -21.820        | SR             | -0.109         | 589        | 50.00        | 1.000        | 24.9         |
| 3           | pg-ak-11-231-1   | 17:28:31        | -21.820        | SR             | -0.109         | 589        | 50.00        | 1.000        | 24.9         |
| 4           | pg-ak-11-231-1   | 17:28:37        | -21.972        | SR             | -0.110         | 589        | 50.00        | 1.000        | 24.9         |
| 5           | pg-ak-11-231-1   | 17:28:44        | -22.277        | SR             | -0.111         | 589        | 50.00        | 1.000        | 24.9         |

**Figure S18.** Specific rotation of (1R,2R,5S)-1a in CHCl<sub>3</sub>.

PG-AK-4-124-1-1H

NAME PG-AK-4-124-1-1H  
EXPNO 1  
PROCNO 1  
Date\_ 20111118  
Time 14.32  
INSTRUM spect  
PROBHD 5 mm PABBO BB-  
PULPROG zg30  
TD 22386  
SOLVENT CDC13  
NS 53  
DS 0  
SWH 8012.820 Hz  
FIDRES 0.357939 Hz  
AQ 1.3969364 sec  
RG 71.8  
DW 62.400 usec  
DE 6.50 usec  
TE 293.8 K  
D1 1.0000000 sec  
TDO 1

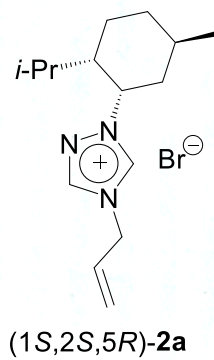

===== CHANNEL f1 =====  
NUC1 1H  
P1 13.50 usec  
PL1 -1.00 dB  
PL1W 10.56200695 W  
SF01 400.1324008 MHz  
SI 32768  
SF 400.1299905 MHz  
WDW EM  
SSB 0  
LB 0.00 Hz  
GB 0  
PC 1.00

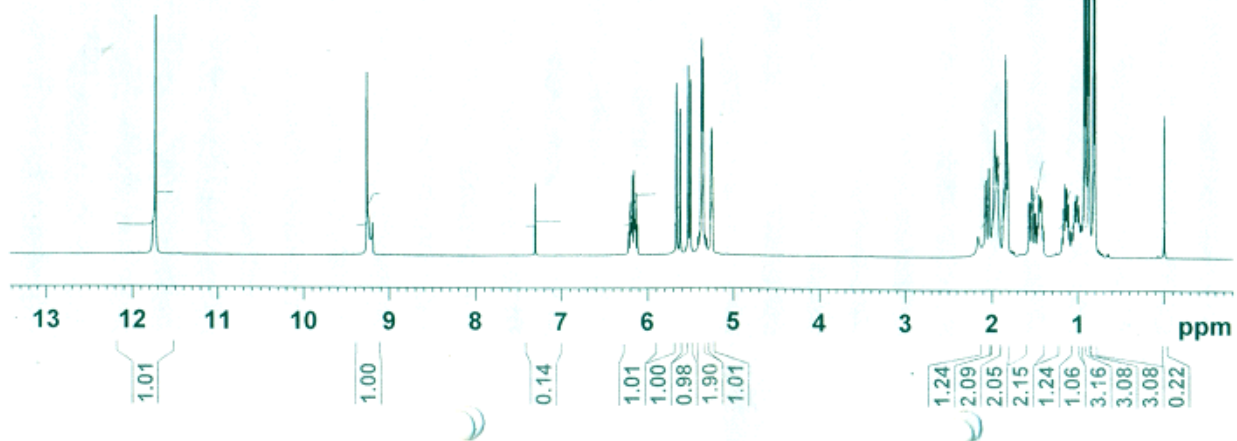

Figure S19. <sup>1</sup>H NMR spectrum of 1S,2S,5R-2a in CDCl<sub>3</sub>.

PG-AK-4-124-13C

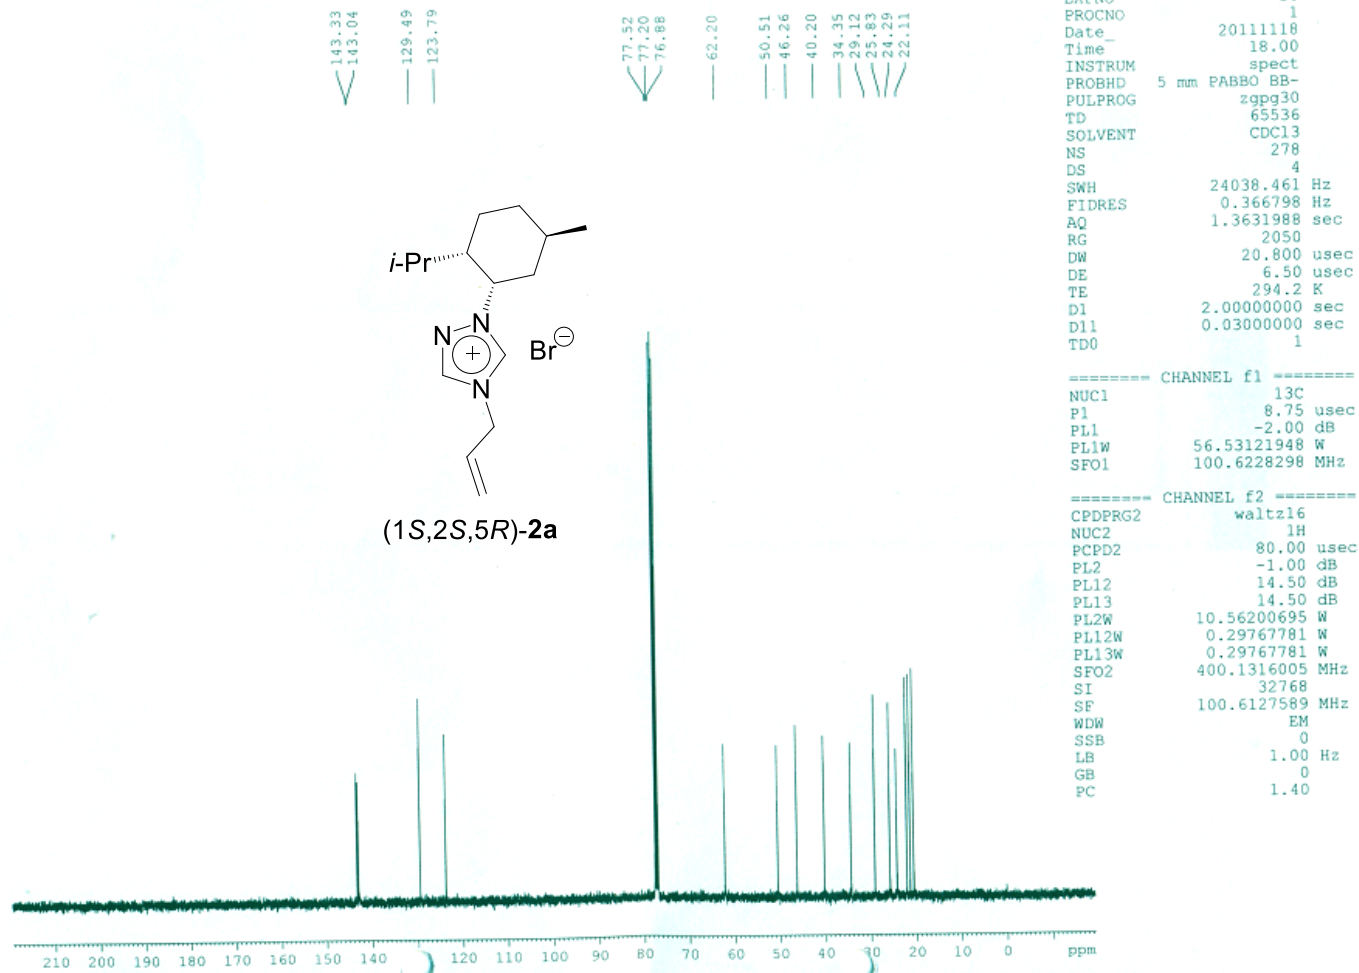

Figure S20.  $^{13}\text{C}\{^1\text{H}\}$  NMR spectrum of 1S,2S,5R-2a in  $\text{CDCl}_3$ .

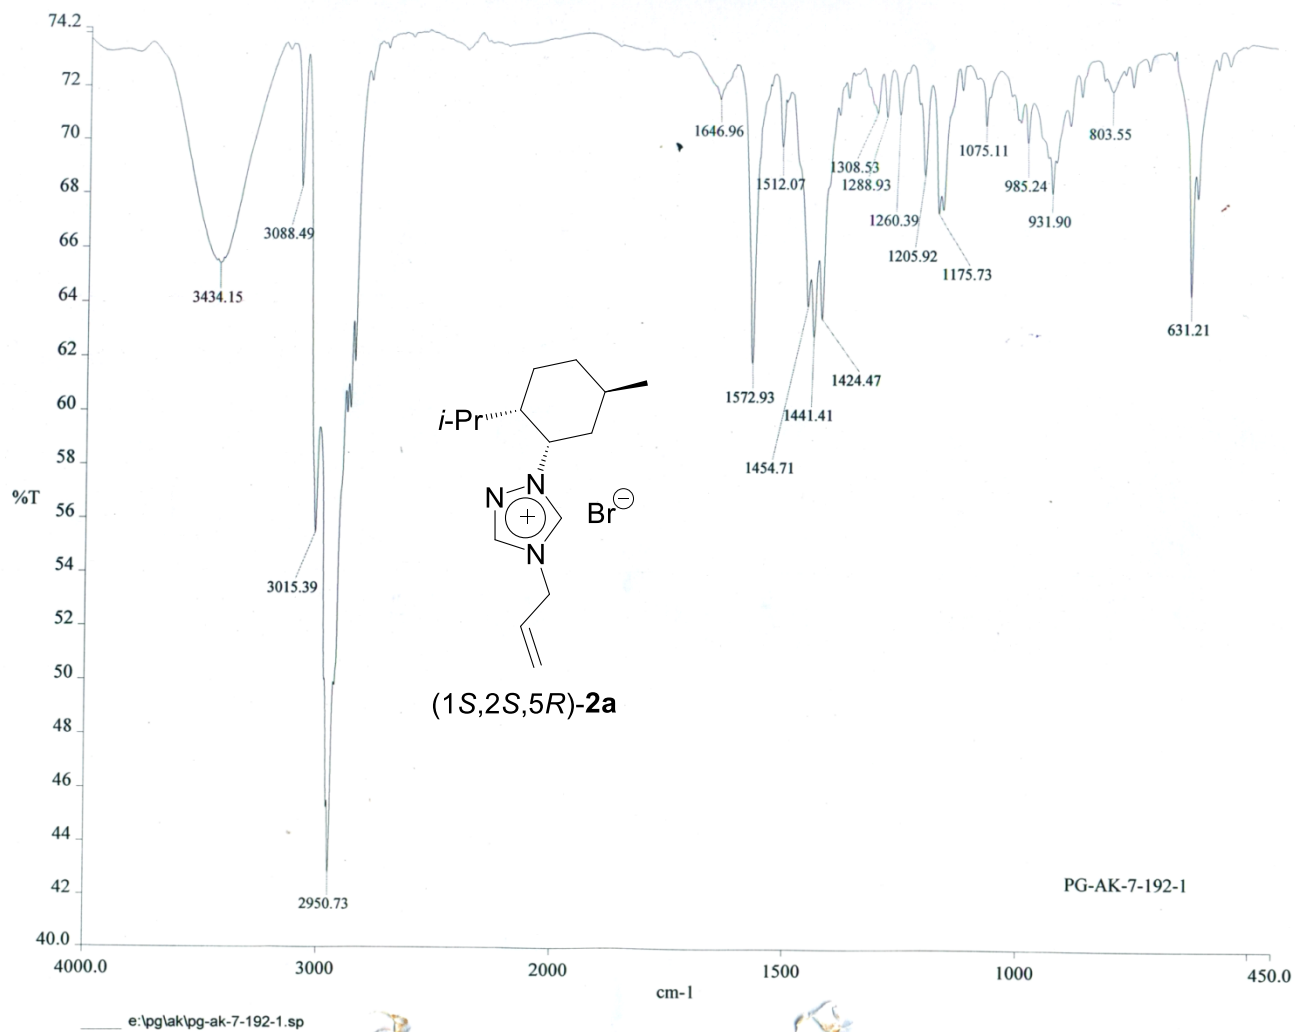

**Figure S21.** Infrared spectrum of 1*S*,2*S*,5*R*-2a in KBr.

## Elemental Composition Report

Page 1

### Single Mass Analysis (displaying only valid results)

Tolerance = 50.0 PPM / DBE: min = -1.5, max = 100.0

Isotope cluster parameters: Separation = 1.0 Abundance = 1.0%

Monoisotopic Mass, Odd and Even Electron Ions

3 formula(e) evaluated with 1 results within limits (up to 50 closest results for each mass)

Micromass : Q-ToF micro (YA-105)

Dept. Of Chemistry I.I.T.(B)

01-Dec-201110:00:59

C<sub>15</sub>H<sub>26</sub>N<sub>3</sub>Br

PG-AK-4-124 19 (0.187) AM (Cen,5, 80.00, HI,5000.0,556.28,1.00); Sb (5,40.00 ); Cm (13:33)

TOF MS ES+

4.29e3

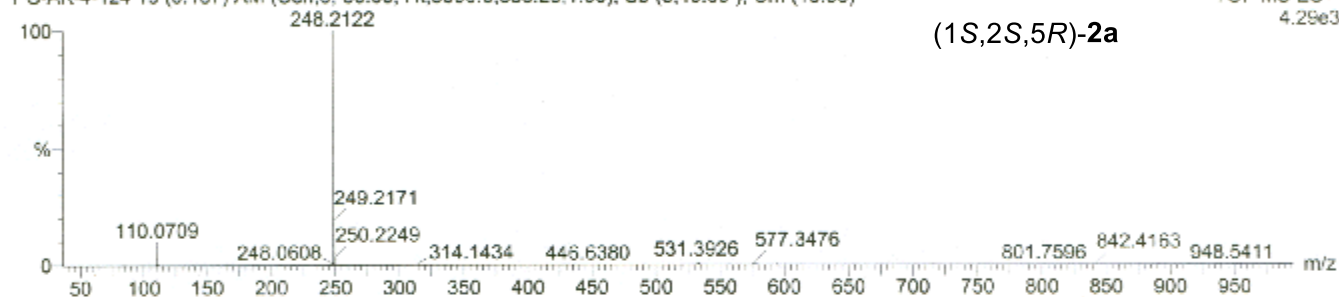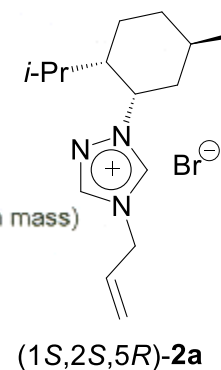

| Mass     | Calc. Mass | mDa  | PPM  | DBE | Score | Formula                                        |
|----------|------------|------|------|-----|-------|------------------------------------------------|
| 248.2122 | 248.2127   | -0.5 | -2.1 | 4.5 | 1     | C <sub>15</sub> H <sub>26</sub> N <sub>3</sub> |

Figure S22. High Resolution Mass Spectrometry (HRMS) data of 1S,2S,5R-2a.

## Eager 300 Report

Page: 1    Sample: PG-AK-7-192 (PG-AK-7-192)

Method Name : SP-19-08-13  
 Method File : D:\CHNS2012-13\SP-190813.mth  
 Chromatogram : PG-AK-7-192  
 Operator ID : MNRAO  
 Analysed : 08/19/2013 14:14  
 Sample ID : PG-AK-7-192 (# 18)  
 Analysis Type : UnkNown (Area)

Company Name : C.E. Instruments  
 Printed : 8/19/2013 22:30  
 Instrument N. : Instrument #1  
 Sample weight : .671

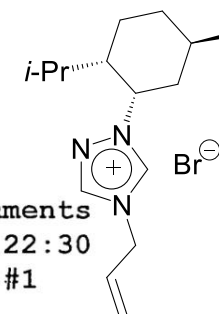

(1S,2S,5R)-2a

Calib. method : using 'K Factors'

!!! Warning missing one or more peaks.

| Element Name | %       | Ret.Time | Area    | BC | Area ratio | K factor    |
|--------------|---------|----------|---------|----|------------|-------------|
| 1            | 0.0000  | 18       | 3652    | RS |            | 0.0000      |
| Nitrogen     | 12.6831 | 43       | 112844  | FU | 8.757821   | .132596E+07 |
| Carbon       | 54.9056 | 66       | 988271  | FU | 1.000000   | .267626E+07 |
| Hydrogen     | 7.3224  | 178      | 306922  | RS | 3.219941   | .604146E+07 |
| Totals       | 74.9112 |          | 1411689 |    |            |             |

Figure S23. Elemental analysis data of 1S,2S,5R-2a.



PG-AK-7-192.p1d

[Comment]  
Sample name  
Comment  
User  
Division  
Company IITB

[Data Information]  
Creation Date 8/1/2013 1 08 PM

[Measurement Information]  
Instrument Name JASCO POLARIMETER  
Model Name P-2000  
Serial No A043361232  
Polarizer Dichrom  
Faraday Cell Flint Glass

Accessory PTC-203  
Accessory S/N A017861234  
Path Length 100 mm

Light Source Na  
Monitor wavelength 589 nm  
D I T 5 sec  
No of cycle 5  
Cycle interval 5 sec  
Temp Monitor Cell  
Temp Corr Factor None  
Aperture(S) 3.0mm  
Aperture(L) Auto  
Mode Specific O R  
Path Length 100 mm  
Concentration 1 w/v  
Factor 1

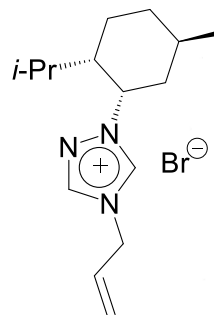

(1S,2S,5R)-2a

| No | Sample Name   | Measurement Date | Temperature[C] | Optical Rotation Monitor | Specific O R | S D    | C V    | Comment |
|----|---------------|------------------|----------------|--------------------------|--------------|--------|--------|---------|
| 1  | PG-AK-7-192   |                  |                | 0.22                     | 21.7280      | 0.0901 | 0.4147 | CHCl3   |
| 2  | PG-AK-7-192-1 | 8/1/2013 1 07 PM | 25.00          | 0.22                     | 21.6800      |        |        |         |
| 3  | PG-AK-7-192-2 | 8/1/2013 1 07 PM | 25.00          | 0.22                     | 21.8400      |        |        |         |
| 4  | PG-AK-7-192-3 | 8/1/2013 1 07 PM | 25.00          | 0.22                     | 21.7000      |        |        |         |
| 5  | PG-AK-7-192-4 | 8/1/2013 1 07 PM | 25.00          | 0.22                     | 21.8000      |        |        |         |
| 6  | PG-AK-7-192-5 | 8/1/2013 1 08 PM | 24.99          | 0.22                     | 21.6200      |        |        |         |

Figure S24. Specific rotation of 1S,2S,5R-2a in CHCl<sub>3</sub>.

Current Data Parameters  
NAME PG-AK-11-217-1-1H  
EXPNO 5  
PROCNO 1

F2 - Acquisition Parameters  
Date\_ 20151019  
Time\_ 23.05  
INSTRUM spect  
PROBHD 5 mm PABBO BB/  
PULPROG zg30  
TD 65536  
SOLVENT CDCl3  
NS 16  
DS 2  
SWH 10000.000 Hz  
FIDRES 0.152588 Hz  
AQ 3.2767999 sec  
RG 80.35  
DW 50.000 usec  
DE 6.50 usec  
TE 297.5 K  
D1 1.00000000 sec  
TDO 1

==== CHANNEL f1 =====  
SFO1 500.1330885 MHz  
NUC1 1H  
P1 13.00 usec  
PLW1 13.00000000 W

F2 - Processing parameters  
SI 65536  
SF 500.1300126 MHz  
WDW EM  
SSB 0  
LB 0.30 Hz  
GB 0  
PC 1.00

PG-AK-11-217-1-1H

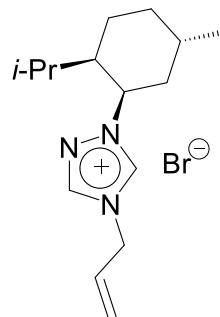

(1R,2R,5S)-2a

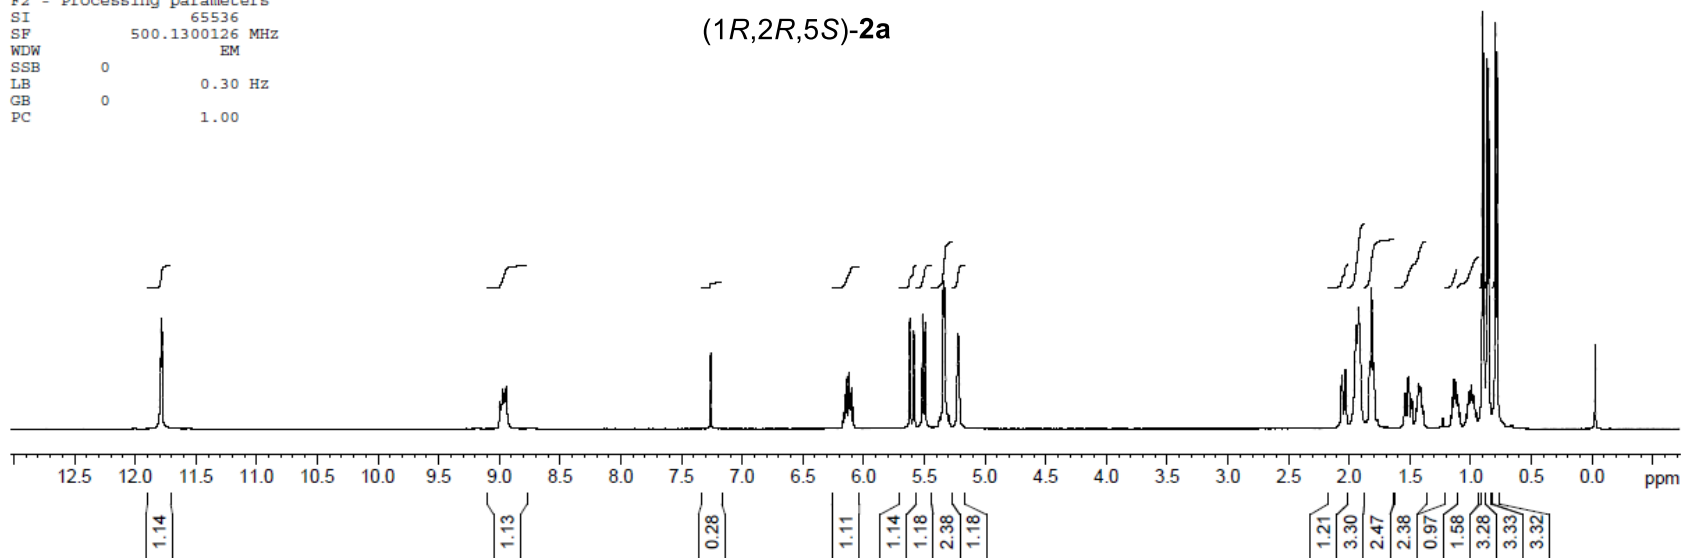

Figure S25.  $^1\text{H}$  NMR spectrum of (1R,2R,5S)-2a in  $\text{CDCl}_3$ .

PG-APP-AK-11-217-2-13C

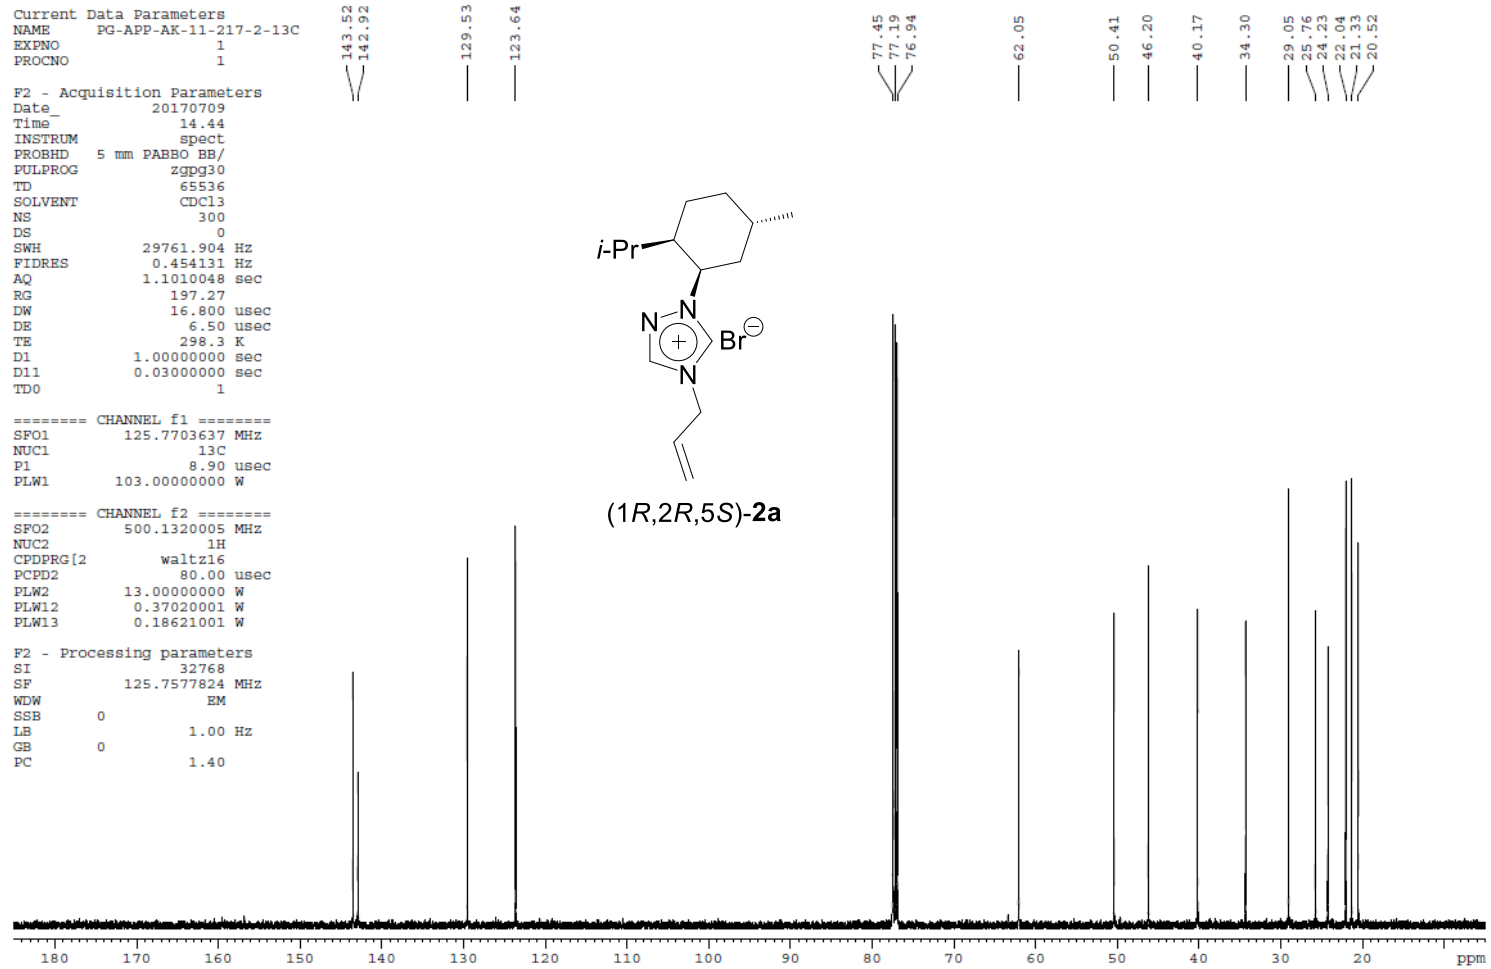

Figure S26.  $^{13}\text{C}\{^1\text{H}\}$  NMR spectrum of 1R,2R,5S-2a in  $\text{CDCl}_3$ .

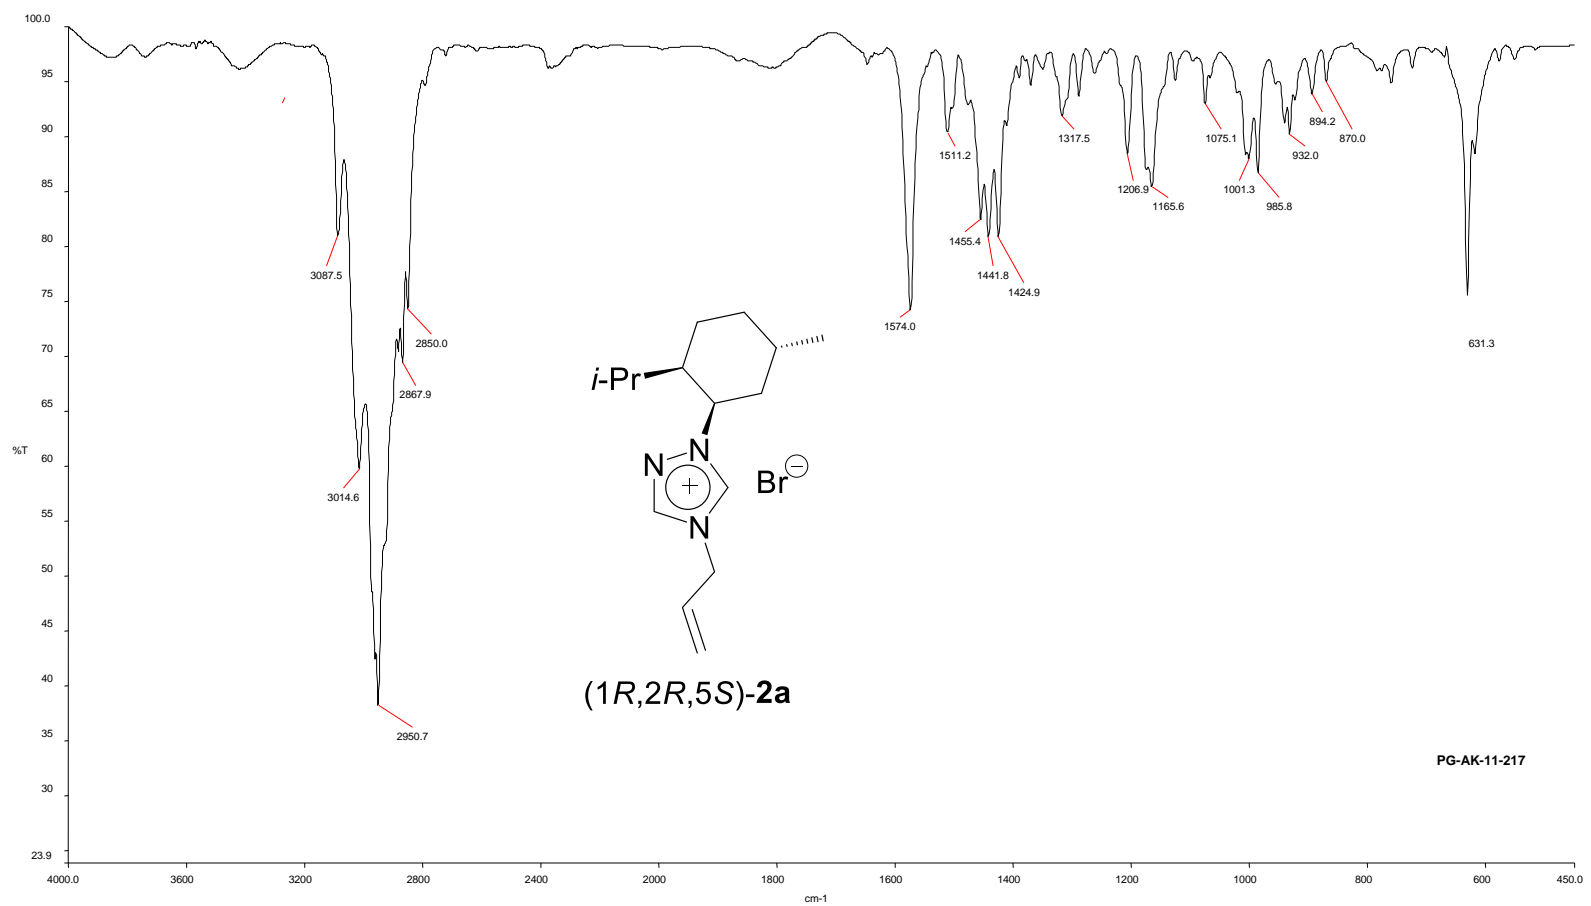

**Figure S27.** Infrared spectrum of 1R,2R,5S-2a in KBr.

DEPARTMENT OF CHEMISTRY, I.I.T.(B)

**Analysis Info**  
 Analysis Name D:\Data\FEB-2016\PG-AK-11-217.d  
 Method Tune\_pos\_NAICSI-1000a.m  
 Sample Name PG-AK-11-217  
 Comment C15H26N3Br  
 Acquisition Date 2/29/2016 8:40:26 PM  
 Operator PG APP IN  
 Instrument maXis impact 282001.00081

**Acquisition Parameter**  
 Source Type ESI Ion Polarity Positive Set Nebulizer 0.3 Bar  
 Focus Active Set Capillary 3700 V Set Dry Heater 180 °C  
 Scan Begin 50 m/z Set End Plate Offset -500 V Set Dry Gas 4.0 l/min  
 Scan End 500 m/z Set Collision Cell RF 1200.0 Vpp Set Divert Valve Source

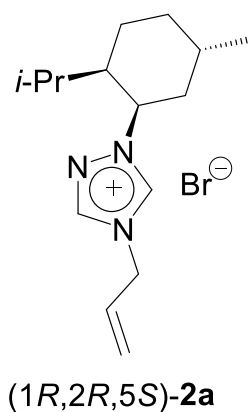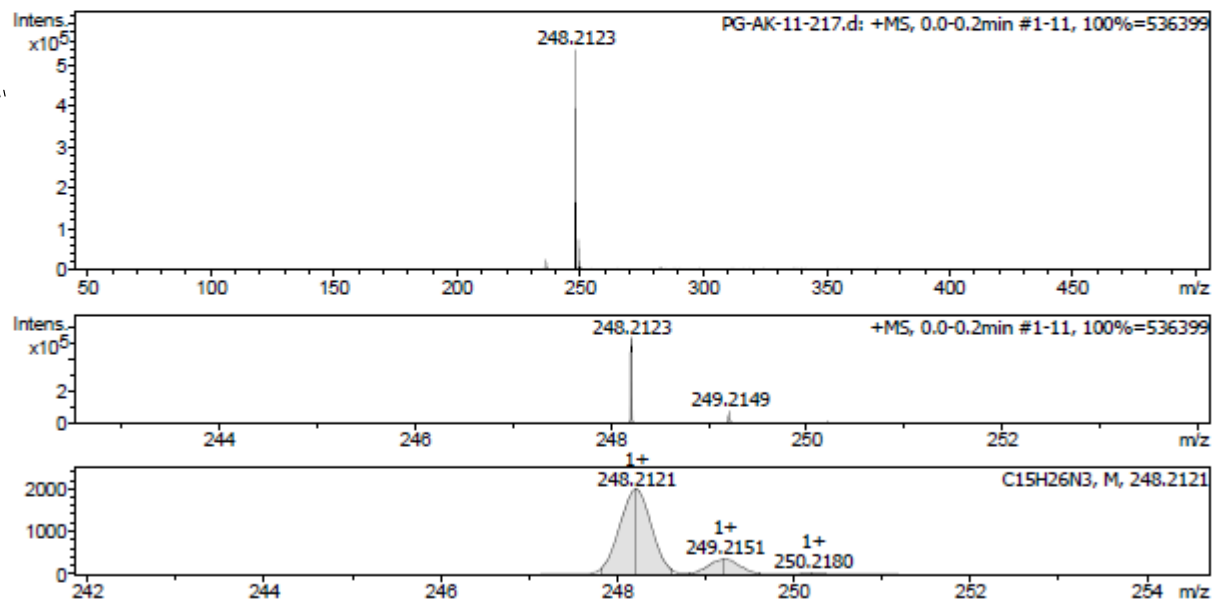

| Meas. m/z | # | Ion Formula | m/z      | err [ppm] | mSigma | # Sigma | Score  | rdb | e <sup>-</sup> Conf | N-Rule |
|-----------|---|-------------|----------|-----------|--------|---------|--------|-----|---------------------|--------|
| 248.2123  | 1 | C15H26N3    | 248.2121 | -0.8      | 21.1   | 1       | 100.00 | 4.5 | even                | ok     |

Figure S28. High Resolution Mass Spectrometry (HRMS) data of 1R,2R,5S-2a.

## Eager 300 Report

Page: 1    Sample: PG-AK-11-217-1 (PG-AK-11-217-1)

Method Name : PGCP13102015  
 Method File : D:\CHNS-2015\PGCP13102015.mth  
 Chromatogram : PG-AK-11-217-1  
 Operator ID : CHANDNI  
 Analysed : 10/13/2015 14:19  
 Sample ID : PG-AK-11-217-1 (# 19)  
 Analysis Type : UnkNown (Area)

Company Name : C.E. Instruments  
 Printed : 10/13/2015 18:36  
 Instrument N. : Instrument #1  
 Sample weight : .566

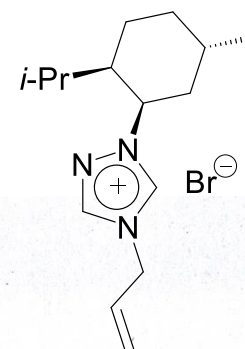

(1R,2R,5S)-2a

Calib. method : using 'K Factors'

!!! Warning missing one or more peaks.

| Element Name | %       | Ret.Time | Area    | BC | Area ratio | K factor    |
|--------------|---------|----------|---------|----|------------|-------------|
| Nitrogen     | 13.0268 | 41       | 79848   | RS | 10.189700  | .108295E+07 |
| Carbon       | 54.9502 | 64       | 813622  | RS | 1.000000   | .260680E+07 |
| Hydrogen     | 7.3945  | 175      | 293284  | RS | 2.774178   | .665180E+07 |
| Totals       | 75.3715 |          | 1186754 |    |            |             |

Figure S29. Elemental analysis data of (1R,2R,5S)-2a.

CENTRAL FACILITY LAB CHEMISTRY DEPT. IIT MUMBAI

Monday, 12-OCT-2015

This sample was measured on an Autopol IV, Serial #82083  
Manufactured by Rudolph Research Analytical, Hackettstown, NJ, USA.

Lot ID : pg

Set Temperature : 25.0  
Time Delay : Disabled  
Temperature Correction : OFF

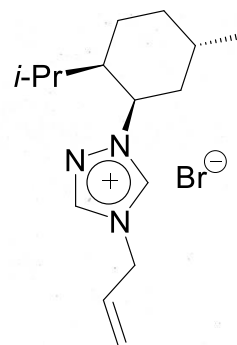

(1R,2R,5S)-2a

| <u>n</u>    | <u>Average</u>   | <u>Std.Dev.</u> | <u>Maximum</u> | <u>Minimum</u> |                |            |              |              |              |  |
|-------------|------------------|-----------------|----------------|----------------|----------------|------------|--------------|--------------|--------------|--|
| 5           | -21.599          | 0.0000          | -21.599        | -21.599        |                |            |              |              |              |  |
| <u>S.No</u> | <u>Sample ID</u> | <u>Time</u>     | <u>Result</u>  | <u>Scale</u>   | <u>OR °Arc</u> | <u>WLG</u> | <u>Lg.mm</u> | <u>Conc.</u> | <u>Temp.</u> |  |
| 1           | pg-ak-11-217-1   | 12:51:46        | -21.599        | SR             | -0.108         | 589        | 50           | 1            | 24.9         |  |
| 2           | pg-ak-11-217-1   | 12:51:53        | -21.599        | SR             | -0.108         | 589        | 50           | 1            | 24.9         |  |
| 3           | pg-ak-11-217-1   | 12:52:00        | -21.599        | SR             | -0.108         | 589        | 50           | 1            | 24.9         |  |
| 4           | pg-ak-11-217-1   | 12:52:07        | -21.599        | SR             | -0.108         | 589        | 50           | 1            | 24.9         |  |
| 5           | pg-ak-11-217-1   | 12:52:13        | -21.599        | SR             | -0.108         | 589        | 50           | 1            | 24.9         |  |

Figure S30. Specific rotation of (1R,2R,5S)-2a in CHCl<sub>3</sub>.

NAME PG-AK-11-218-1-1H  
 EXPNO 1  
 PROCNO 1  
 Date\_ 20151029  
 Time\_ 22.39  
 INSTRUM spect  
 PROBHD 5 mm SEI 1H/D-  
 PULPROG zg30  
 TD 54274  
 SOLVENT CDCl3  
 NS 16  
 DS 0  
 SWH 8223.685 Hz  
 FIDRES 0.151522 Hz  
 AQ 3.2999091 sec  
 RG 32  
 DW 60.800 usec  
 DE 6.50 usec  
 TE 294.1 K  
 D1 1.0000000 sec  
 TD0 1

PG-AK-11-218-1-1H

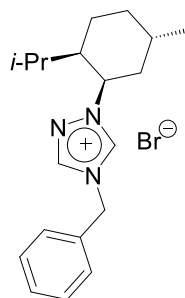

(1*R*,2*R*,5*S*)-**3a**

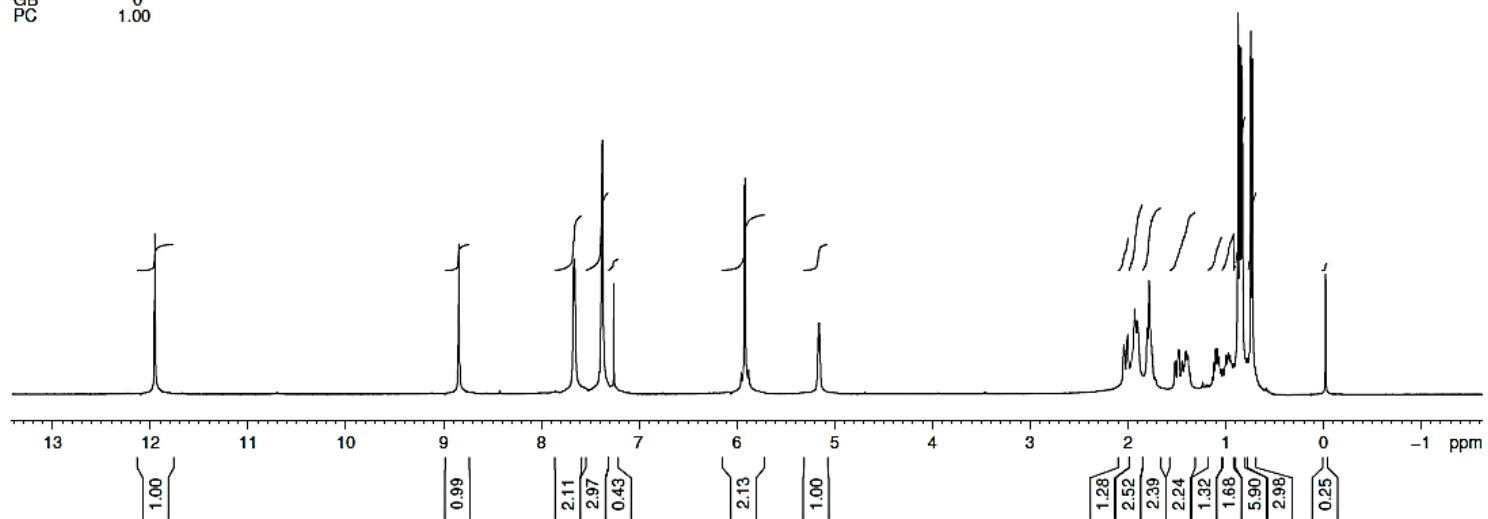

Figure S31. <sup>1</sup>H NMR spectrum of (1*R*,2*R*,5*S*)-**3a** in CDCl<sub>3</sub>.



PG-APP-AK-11-218-2-13C

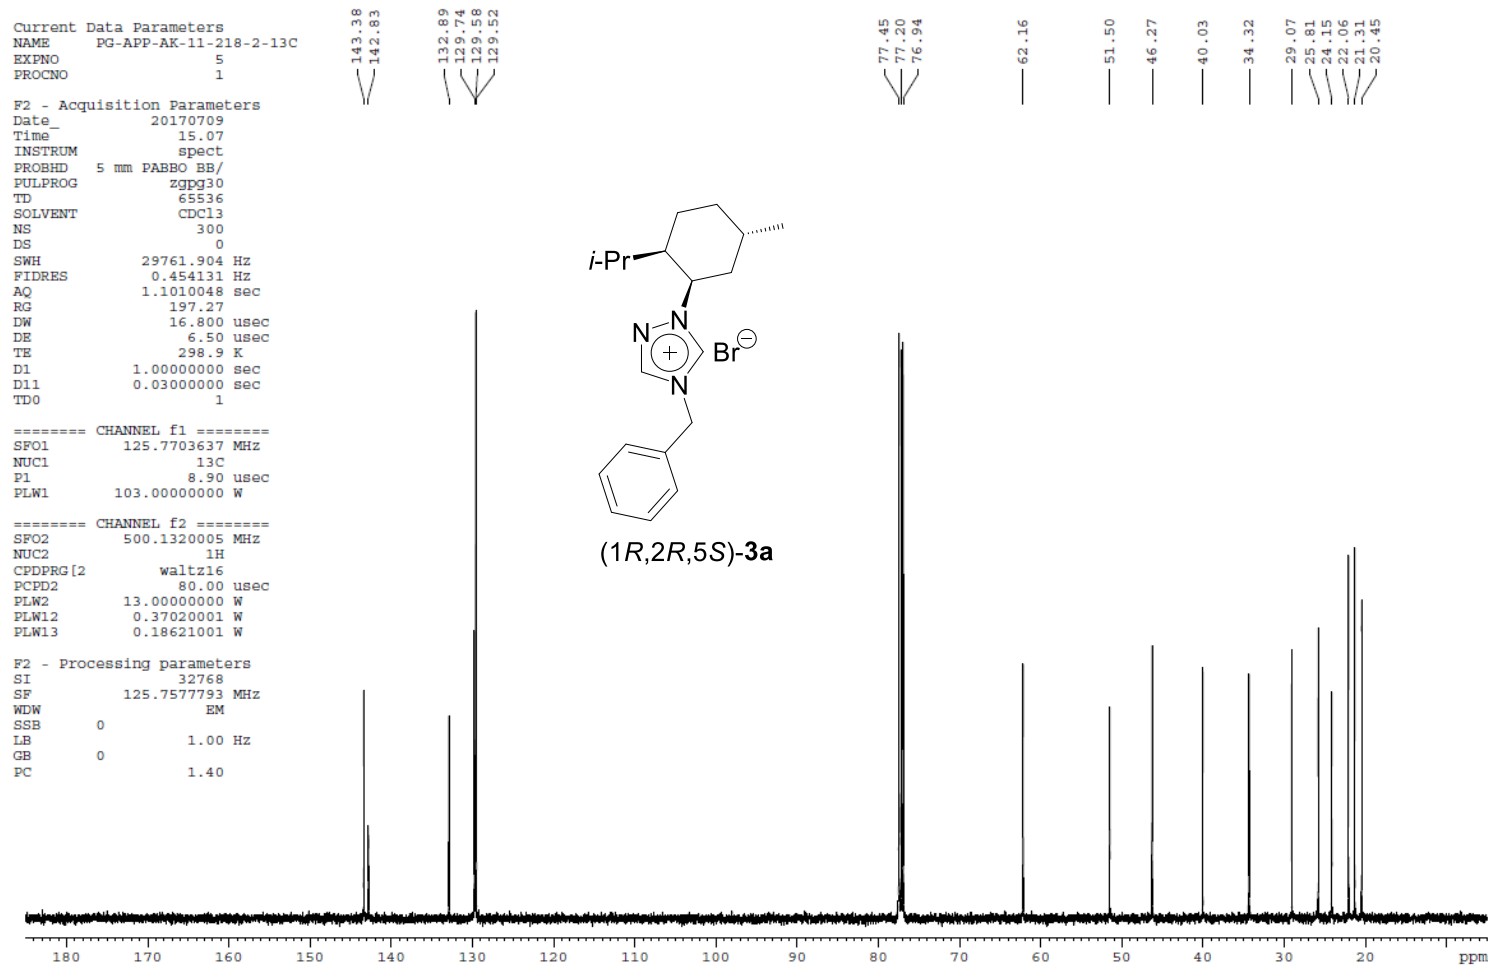

Figure S32.  $^{13}\text{C}\{^1\text{H}\}$  NMR spectrum of (1*R*,2*R*,5*S*)-**3a** in  $\text{CDCl}_3$ .

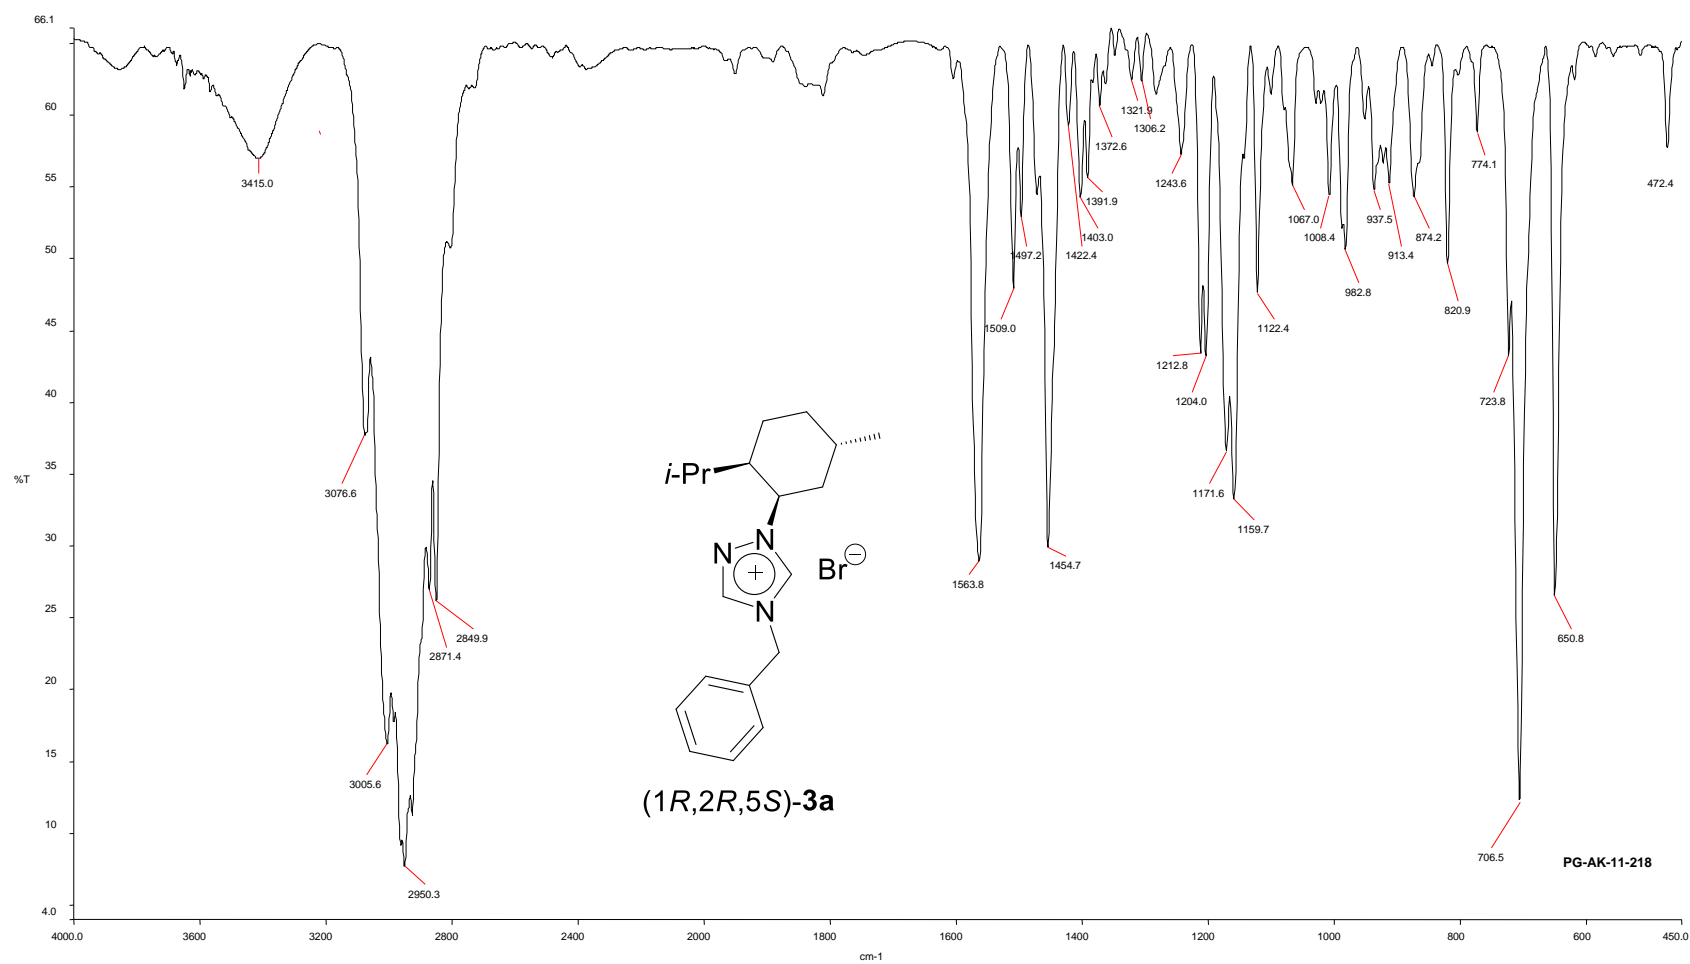

**Figure S33.** Infrared spectrum of 1R,2R,5S-3a in KBr.

DEPARTMENT OF CHEMISTRY, I.I.T.(B)

|                      |                                 |                                       |                           |
|----------------------|---------------------------------|---------------------------------------|---------------------------|
| <b>Analysis Info</b> |                                 | Acquisition Date 2/29/2016 8:47:34 PM |                           |
| Analysis Name        | D:\Data\FEB-2016\PG-AK-11-218.d | Operator                              | PG APP IN                 |
| Method               | Tune_pos_NAICSI-1000a.m         | Instrument                            | maXis impact 282001.00081 |
| Sample Name          | PG-AK-11-218                    |                                       |                           |
| Comment              | C19H28N3Br                      |                                       |                           |

|                              |         |                       |            |                  |           |
|------------------------------|---------|-----------------------|------------|------------------|-----------|
| <b>Acquisition Parameter</b> |         |                       |            |                  |           |
| Source Type                  | ESI     | Ion Polarity          | Positive   | Set Nebulizer    | 0.3 Bar   |
| Focus                        | Active  | Set Capillary         | 3700 V     | Set Dry Heater   | 180 °C    |
| Scan Begin                   | 50 m/z  | Set End Plate Offset  | -500 V     | Set Dry Gas      | 4.0 l/min |
| Scan End                     | 600 m/z | Set Collision Cell RF | 1200.0 Vpp | Set Divert Valve | Source    |

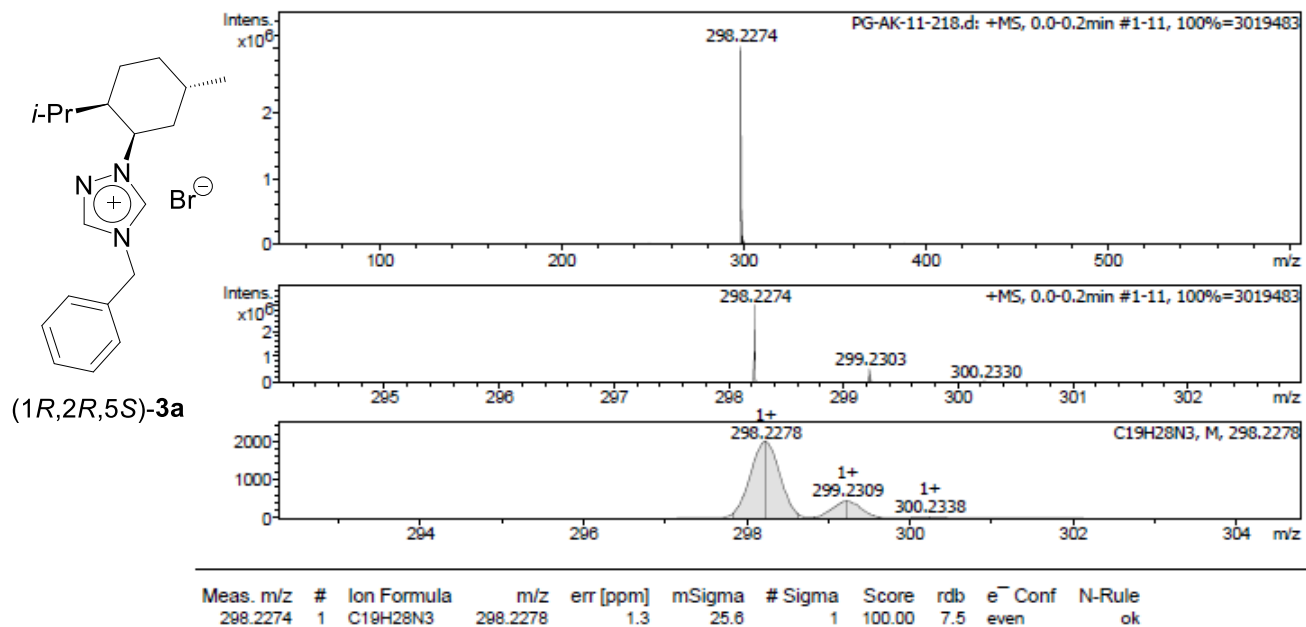

**Figure S34.** High Resolution Mass Spectrometry (HRMS) data of **1R,2R,5S-3a**.

## Eager 300 Report

Page: 1    Sample: PG-AK-11-218-1 (PG-AK-11-218-1)

|                                             |                                 |
|---------------------------------------------|---------------------------------|
| Method Name : PGCP13102015                  |                                 |
| Method File : D:\CHNS-2015\PGCP13102015.mth |                                 |
| Chromatogram : PG-AK-11-218-1               |                                 |
| Operator ID : CHANDNI                       | Company Name : C.E. Instruments |
| Analysed : 10/13/2015 15:18                 | Printed : 10/13/2015 18:36      |
| Sample ID : PG-AK-11-218-1 (# 21)           | Instrument N. : Instrument #1   |
| Analysis Type : UnkNown (Area)              | Sample weight : .815            |

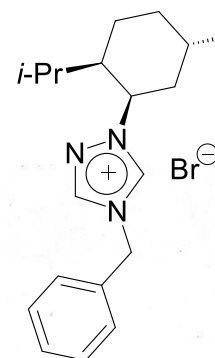

(1R,2R,5S)-3a

Calib. method : using 'K Factors'

!!! Warning missing one or more peaks.

| Element Name | %       | Ret.Time | Area    | BC | Area ratio | K factor    |
|--------------|---------|----------|---------|----|------------|-------------|
| Nitrogen     | 11.2482 | 41       | 99276   | FU | 12.849350  | .108295E+07 |
| Carbon       | 59.9083 | 64       | 1275636 | FU | 1.000000   | .260680E+07 |
| Hydrogen     | 6.6576  | 178      | 375811  | RS | 3.394355   | .665180E+07 |
| Totals       | 77.8141 |          | 1750723 |    |            |             |

Figure S35. Elemental analysis data of (1R,2R,5S)-3a.

CENTRAL FACILITY LAB CHEMISTRY DEPT. IIT MUMBAI

Monday, 12-OCT-2015

This sample was measured on an Autopol IV, Serial #82083  
Manufactured by Rudolph Research Analytical, Hackettstown, NJ, USA.

Lot ID : pg

Set Temperature : 25.0

Time Delay : Disabled

Temperature Correction : OFF

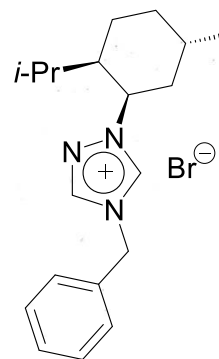

(1R,2R,5S)-3a

| <u>n</u>    | <u>Average</u>   | <u>Std.Dev.</u> | <u>Maximum</u> | <u>Minimum</u> |                |            |              |              |              |  |
|-------------|------------------|-----------------|----------------|----------------|----------------|------------|--------------|--------------|--------------|--|
| 5           | -16.174          | 0.0827          | -16.083        | -16.234        |                |            |              |              |              |  |
| <u>S.No</u> | <u>Sample ID</u> | <u>Time</u>     | <u>Result</u>  | <u>Scale</u>   | <u>OR °Arc</u> | <u>WLG</u> | <u>Lg.mm</u> | <u>Conc.</u> | <u>Temp.</u> |  |
| 1           | pg-ak-11-218-1   | 12:57:21        | -16.083        | SR             | -0.080         | 589        | 50           | 1            | 24.8         |  |
| 2           | pg-ak-11-218-1   | 12:57:28        | -16.083        | SR             | -0.080         | 589        | 50           | 1            | 24.8         |  |
| 3           | pg-ak-11-218-1   | 12:57:35        | -16.234        | SR             | -0.081         | 589        | 50           | 1            | 24.8         |  |
| 4           | pg-ak-11-218-1   | 12:57:41        | -16.234        | SR             | -0.081         | 589        | 50           | 1            | 24.8         |  |
| 5           | pg-ak-11-218-1   | 12:57:48        | -16.234        | SR             | -0.081         | 589        | 50           | 1            | 24.9         |  |

Figure S36. Specific rotation of (1R,2R,5S)-3a in CHCl<sub>3</sub>.

NAME PG-AK-11-224-1-1  
 EXPNO 19  
 PROCNO 1  
 Date\_ 20151016  
 Time 19.23  
 INSTRUM spect  
 PROBHD 5 mm PABBO BB-  
 PULPROG zg30  
 TD 54274  
 SOLVENT CDCl3  
 NS 7  
 DS 0  
 SWH 8223.685 Hz  
 FIDRES 0.151522 Hz  
 AQ 3.2999091 sec  
 RG 144  
 DW 60.800 usec  
 DE 6.50 usec  
 TE 295.5 K  
 D1 1.0000000 sec  
 TD0 1

PG-AK-11-224-1-1H

===== CHANNEL f1 =====  
 NUC1 1H  
 P1 14.75 usec  
 PL1 -1.00 dB  
 PL1W 10.56200695 W  
 SFO1 400.1324710 MHz  
 SI 32768  
 SF 400.1300099 MHz  
 WDW EM  
 SSB 0  
 LB 0.30 Hz  
 GB 0  
 PC 1.00

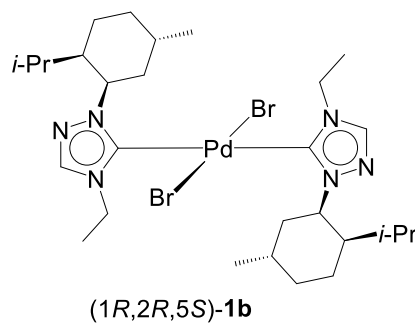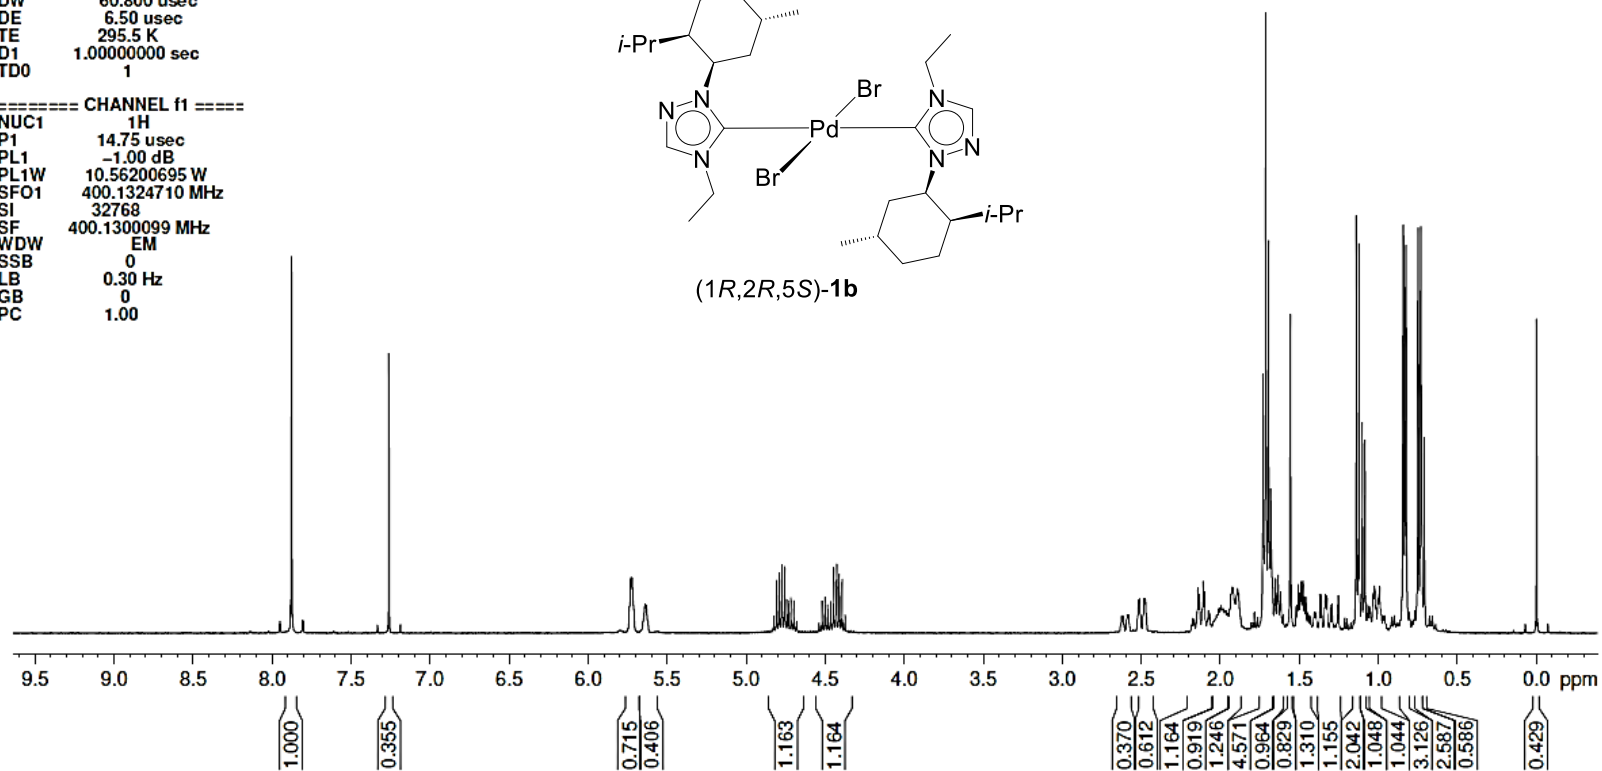

Figure S37. <sup>1</sup>H NMR spectrum of (1R,2R,5S)-1b in CDCl<sub>3</sub>.

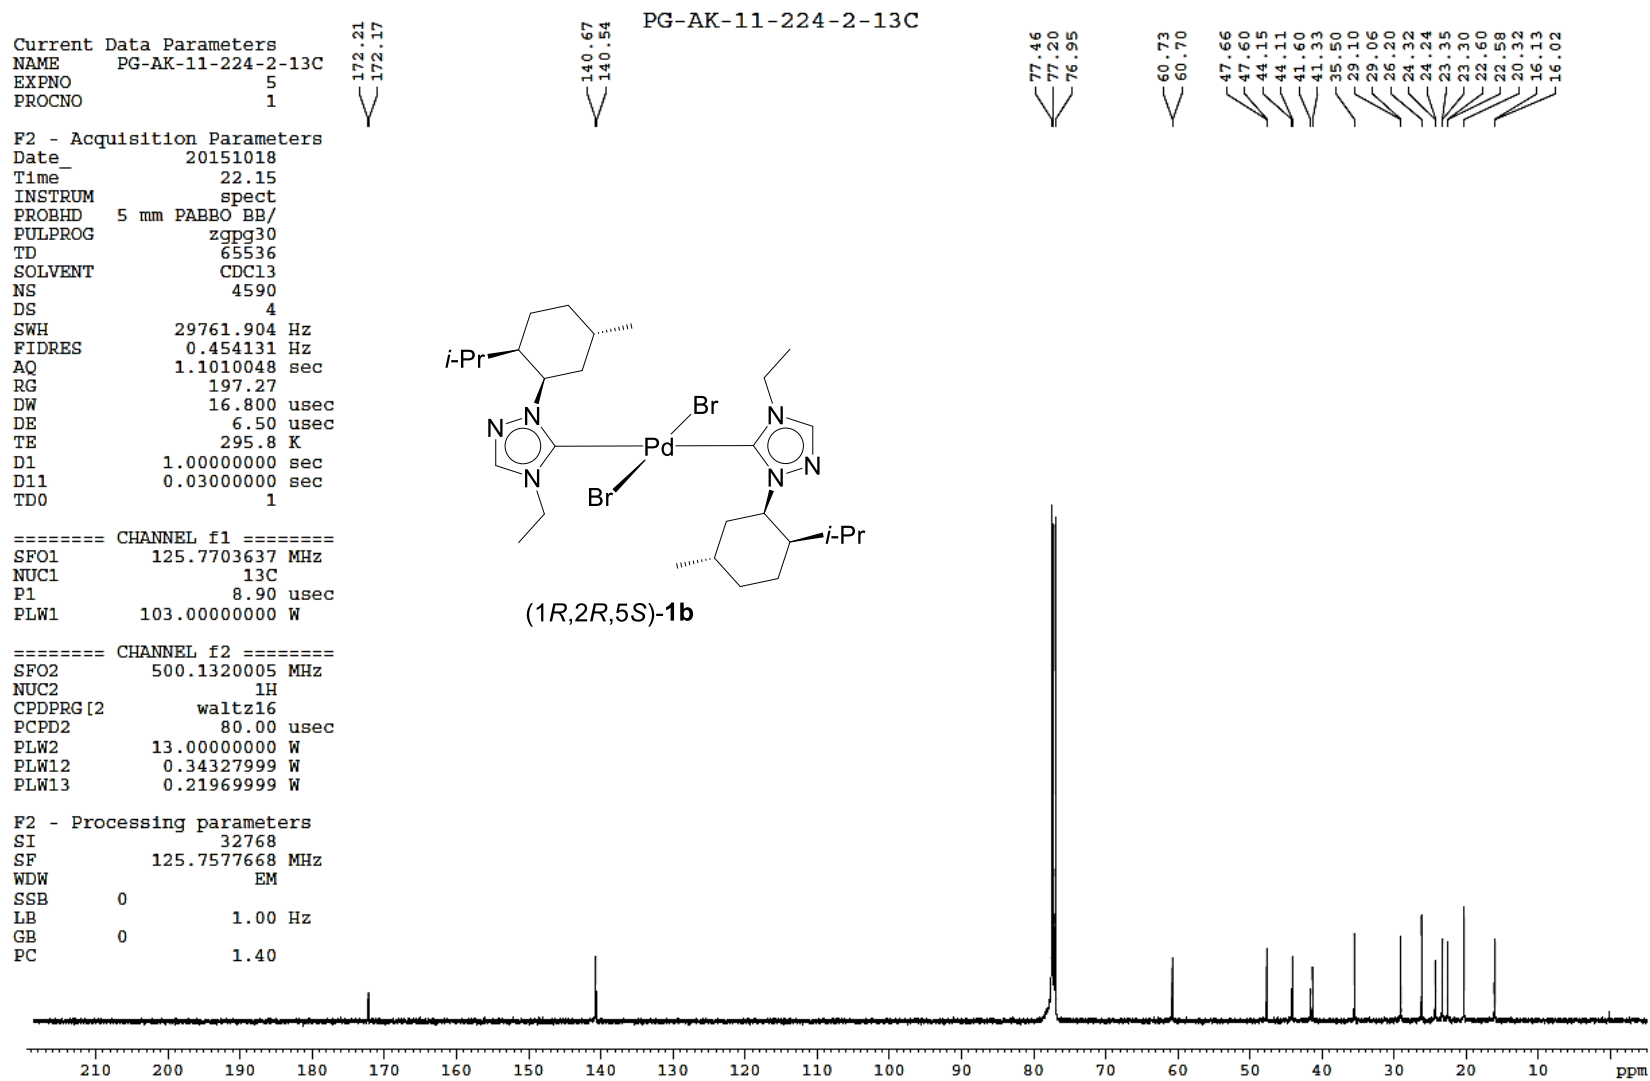

Figure S38.  $^{13}\text{C}\{^1\text{H}\}$  NMR spectrum of (1*R*,2*R*,5*S*)-**1b** in  $\text{CDCl}_3$ .

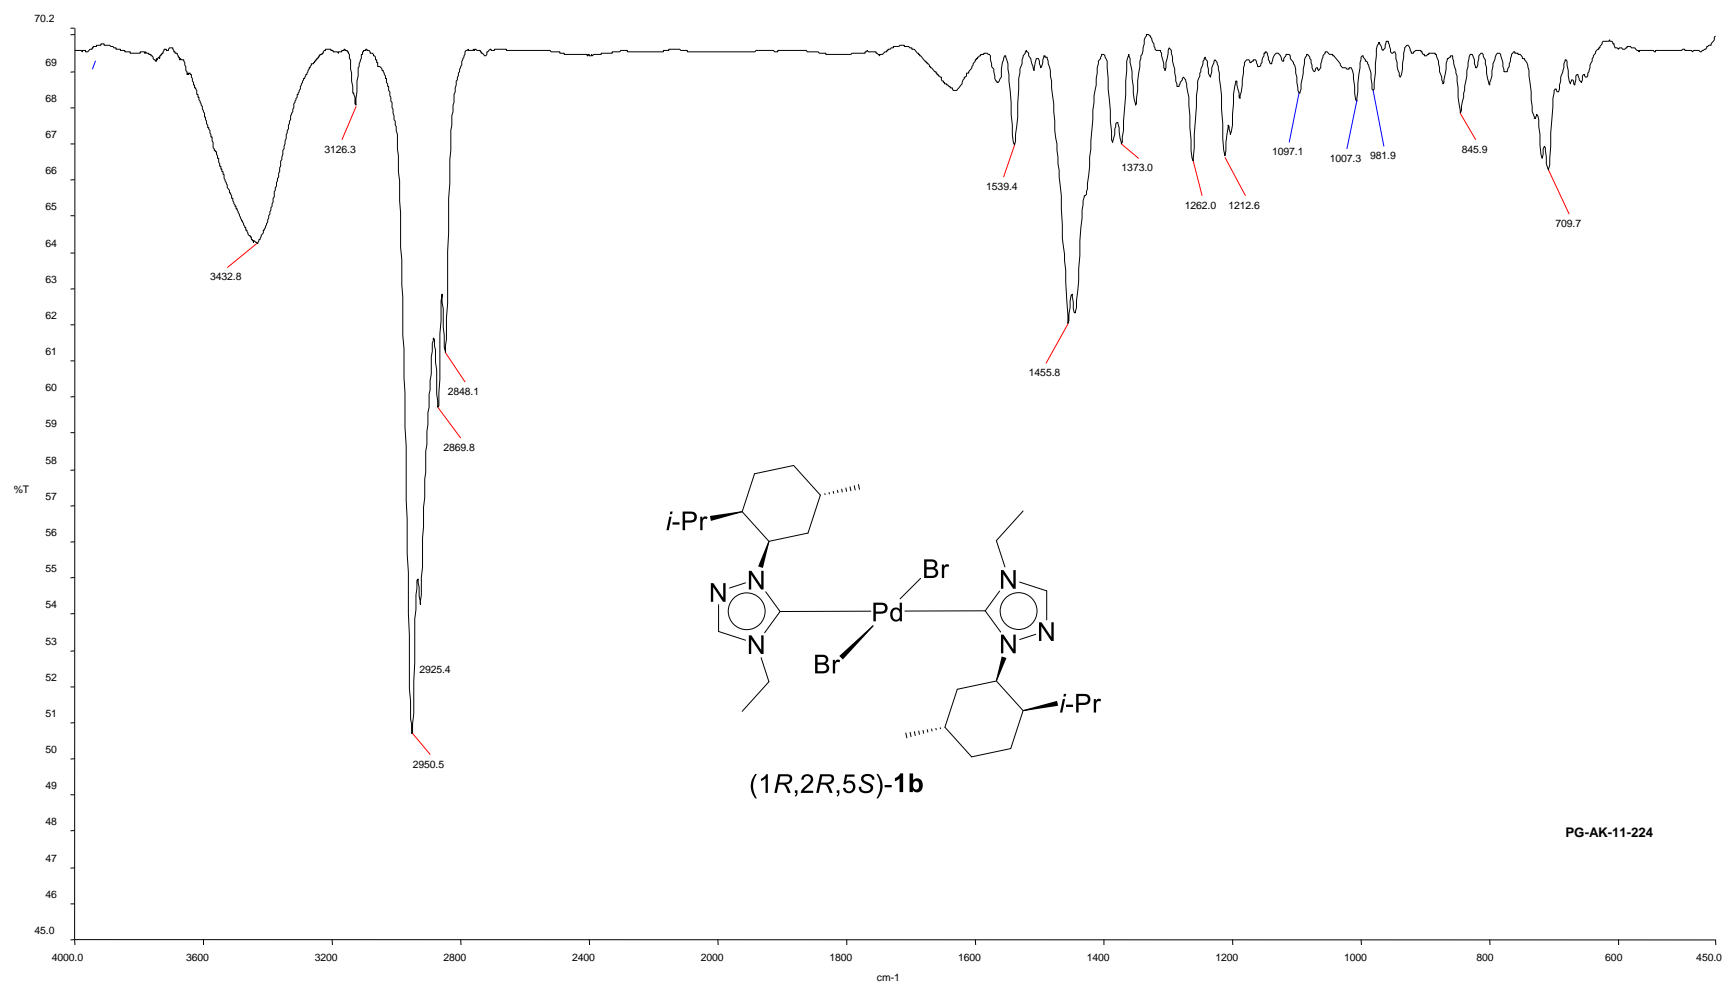

**Figure S39.** Infrared spectrum of **1R,2R,5S-1b** in KBr.



DEPARTMENT OF CHEMISTRY, I.I.T.(B)

Analysis Info

Analysis Name D:\Data\FEB-2016\PG-AK-11-224.d  
 Method Tune\_pos\_NAICSI-2000.m  
 Sample Name PG-AK-11-224  
 Comment C28H50N6PdBr2

Acquisition Date 2/22/2016 9:33:35 PM

Operator PG APP IN  
 Instrument maXis impact 282001.00081

Acquisition Parameter

|             |          |                       |            |                  |           |
|-------------|----------|-----------------------|------------|------------------|-----------|
| Source Type | ESI      | Ion Polarity          | Positive   | Set Nebulizer    | 0.3 Bar   |
| Focus       | Active   | Set Capillary         | 3800 V     | Set Dry Heater   | 180 °C    |
| Scan Begin  | 50 m/z   | Set End Plate Offset  | -500 V     | Set Dry Gas      | 4.0 l/min |
| Scan End    | 2000 m/z | Set Collision Cell RF | 2100.0 Vpp | Set Divert Valve | Source    |

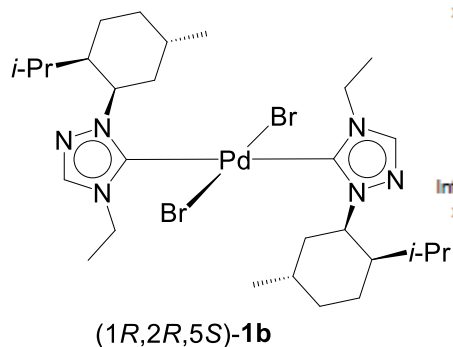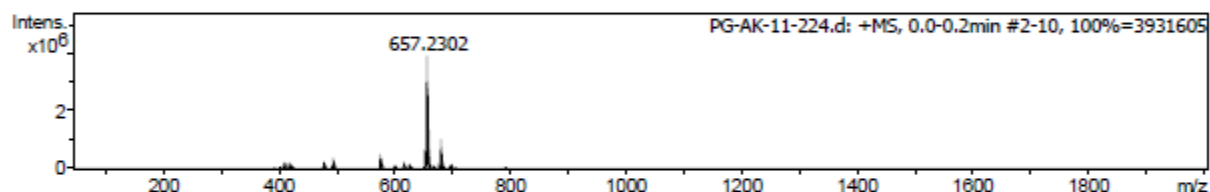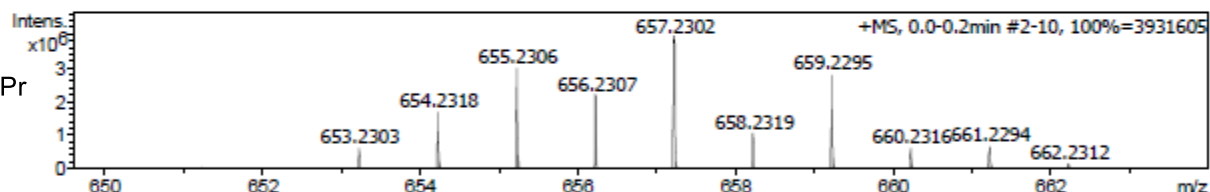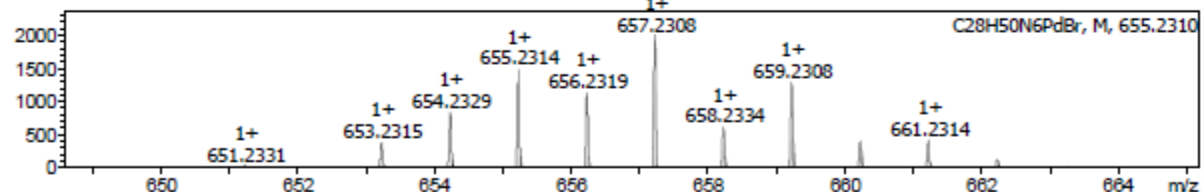

| Meas. m/z | # | Ion Formula  | m/z      | err [ppm] | mSigma | # Sigma | Score  | rdB | e <sup>-</sup> Conf | N-Rule |
|-----------|---|--------------|----------|-----------|--------|---------|--------|-----|---------------------|--------|
| 657.2302  | 1 | C28H50BrN6Pd | 655.2314 | -0.9      | 30.0   | 1       | 100.00 | 8.5 | even                | ok     |

Figure S40. High Resolution Mass Spectrometry (HRMS) data of 1R,2R,5S-1b.

## Eager 300 Report

Page: 1    Sample: PG-AK-11-224-1 (PG-AK-11-224-1)

|                                             |                                 |
|---------------------------------------------|---------------------------------|
| Method Name : PGCP13102015                  | Company Name : C.E. Instruments |
| Method File : D:\CHNS-2015\PGCP13102015.mth | Printed : 10/13/2015 18:36      |
| Chromatogram : PG-AK-11-224-1               | Instrument N. : Instrument #1   |
| Operator ID : CHANDNI                       | Sample weight : .677            |
| Analysed : 10/13/2015 12:46                 |                                 |
| Sample ID : PG-AK-11-224-1 (# 10)           |                                 |
| Analysis Type : UnkNown (Area)              |                                 |

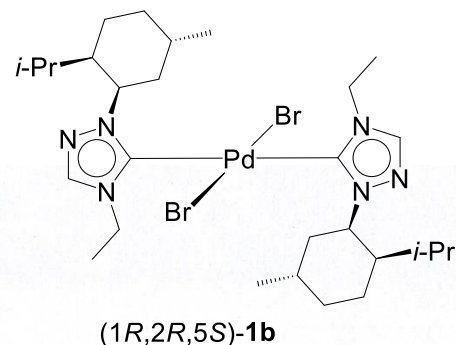

Calib. method : using 'K Factors'

!!! Warning missing one or more peaks.

| Element Name | %       | Ret.Time | Area    | BC | Area ratio | K factor    |
|--------------|---------|----------|---------|----|------------|-------------|
| Nitrogen     | 11.6158 | 41       | 85162   | RS | 9.577969   | .108295E+07 |
| Carbon       | 46.0572 | 65       | 815679  | RS | 1.000000   | .260680E+07 |
| Hydrogen     | 6.4525  | 175      | 305461  | RS | 2.670321   | .665180E+07 |
| Totals       | 64.1256 |          | 1206302 |    |            |             |

**Figure S41.** Elemental analysis data of (1R,2R,5S)-1b.

CENTRAL FACILITY LAB CHEMISTRY DEPT. IIT MUMBAI

Monday, 12-OCT-2015

This sample was measured on an Autopol IV, Serial #82083  
Manufactured by Rudolph Research Analytical, Hackettstown, NJ, USA.

Lot ID : pg

Set Temperature : 25.0  
Time Delay : Disabled  
Temperature Correction : OFF

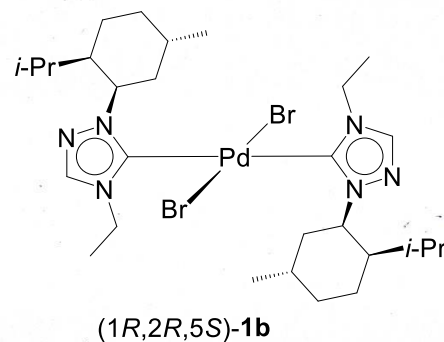

| <u>n</u> | <u>Average</u> | <u>Std.Dev.</u> | <u>Maximum</u> | <u>Minimum</u> |
|----------|----------------|-----------------|----------------|----------------|
| 5        | 29.857         | 0.0680          | 29.887         | 29.735         |

| <u>S.No</u> | <u>Sample ID</u> | <u>Time</u> | <u>Result</u> | <u>Scale</u> | <u>OR °Arc</u> | <u>WLG</u> | <u>Lg.mm</u> | <u>Conc.</u> | <u>Temp.</u> |
|-------------|------------------|-------------|---------------|--------------|----------------|------------|--------------|--------------|--------------|
| 1           | pg-ak-11-224-2   | 12:03:38    | 29.735        | SR           | 0.149          | 589        | 50           | 1            | 24.9         |
| 2           | pg-ak-11-224-2   | 12:03:44    | 29.887        | SR           | 0.149          | 589        | 50           | 1            | 24.9         |
| 3           | pg-ak-11-224-2   | 12:03:51    | 29.887        | SR           | 0.149          | 589        | 50           | 1            | 25.0         |
| 4           | pg-ak-11-224-2   | 12:03:58    | 29.887        | SR           | 0.149          | 589        | 50           | 1            | 25.0         |
| 5           | pg-ak-11-224-2   | 12:04:05    | 29.887        | SR           | 0.149          | 589        | 50           | 1            | 25.0         |

Figure S42. Specific rotation of (1R,2R,5S)-1b in CHCl<sub>3</sub>.

NAME PG-AK-4-133-1-1H  
 EXPRO 2  
 PROCNO 1  
 Date 20111123  
 Time 14.57  
 INSTRUM spect  
 PROBHD 5 mm PABBO BB-  
 PULPROG zg30  
 TD 65536  
 SOLVENT CDCl3  
 NS 16  
 DS 0  
 SWH 8223.685 Hz  
 FIDRES 0.125483 Hz  
 AQ 3.9846387 sec  
 RG 64  
 DW 60.800 usec  
 DE 6.50 usec  
 TE 293.4 K  
 D1 2.00000000 sec  
 TDO 1

PG-AK-4-133-1-1H

----- CHANNEL f1 -----  
 NUCL1 1H  
 P1 13.50 usec  
 PL1 -1.00 dB  
 PL1W 10.56200695 W  
 SFO1 400.1324710 MHz  
 SI 32768  
 SF 400.1300073 MHz  
 WTM EM  
 SSB 0  
 LB 0.30 Hz  
 GB 0  
 FC 1.00

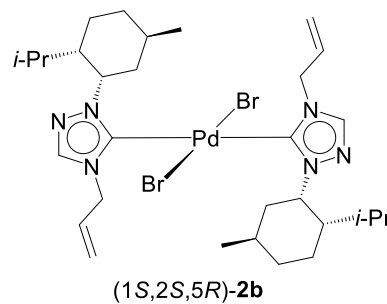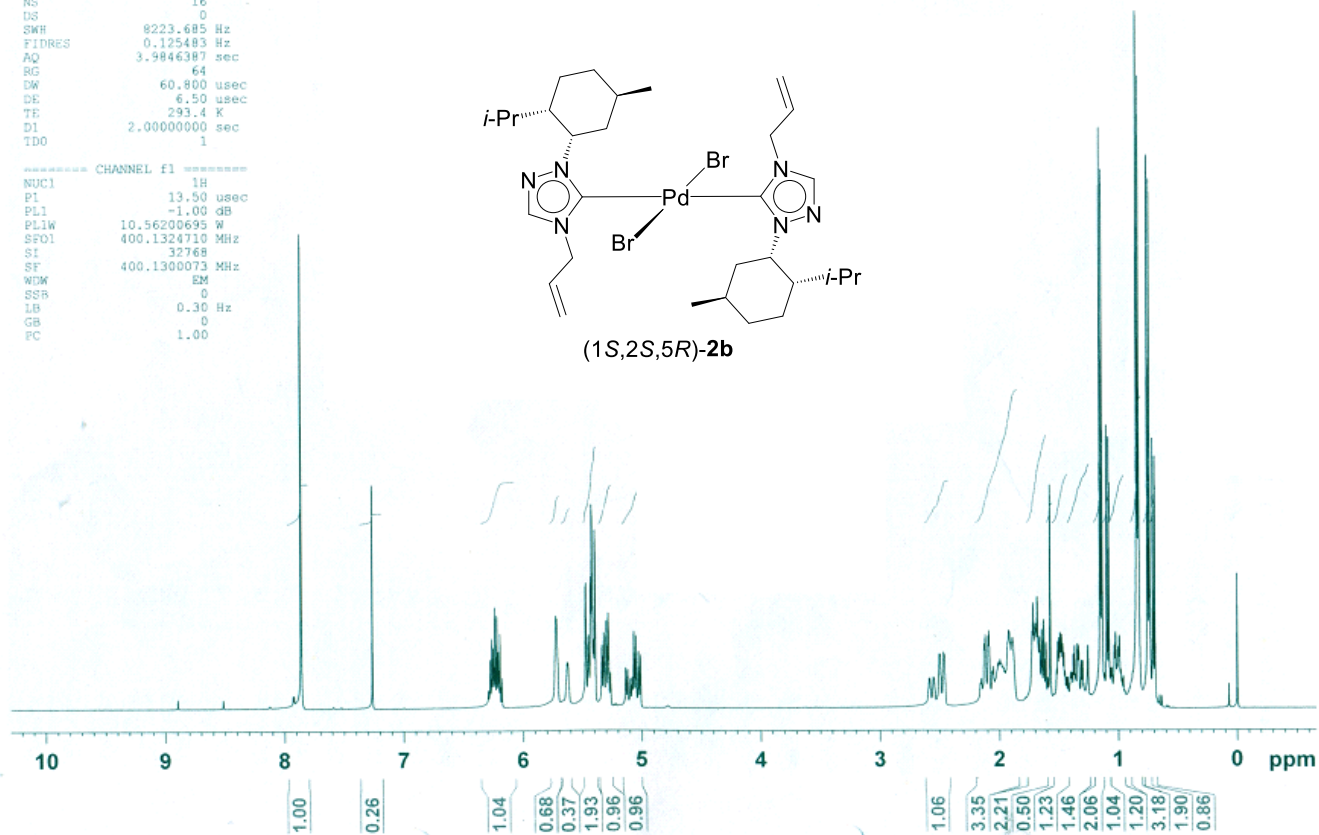

Figure S43.  $^1\text{H}$  NMR spectrum of 1S,2S,5R-2b in  $\text{CDCl}_3$ .

PG-AK-4-133-1-13C

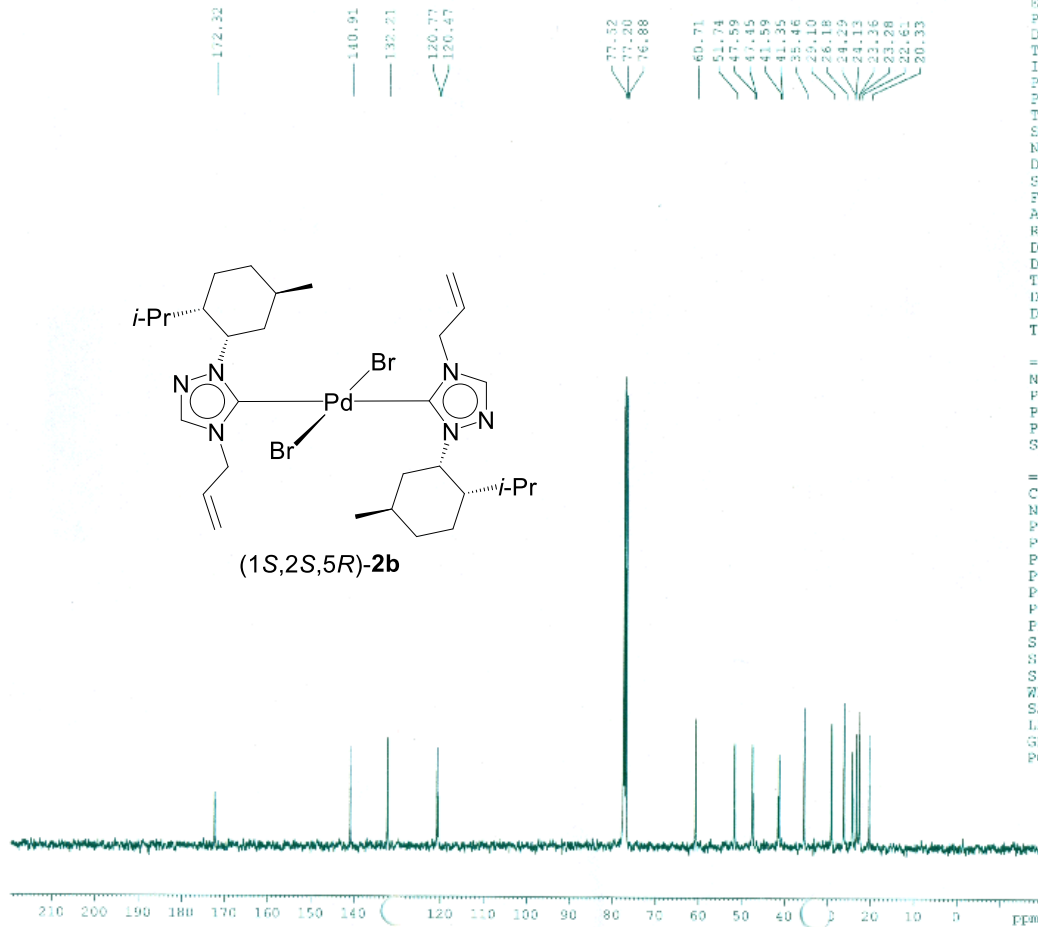

```

NAME PG-AK-4-133-1-13C
EXPNO 3
PROCNO 1
Date_ 20111123
Time 15.07
INSTRUM spect
PROBHD 5 mm PABBO BB-
PULPROG zgpg30
TD 65536
SOLVENT CDCl3
NS 388
DS 6
SWE 24038.461 Hz
FIDRES 0.366798 Hz
AQ 1.3631988 sec
RG 2050
DW 20.800 usec
DE 6.50 usec
TE 294.3 K
D1 1.0000000 sec
D11 0.0300000 sec
TD0 1

```

```

===== CHANNEL f1 =====
NUC1 13C
P1 8.75 usec
PL1 -2.00 dB
PLW 56.53121948 W
SFO1 100.6228298 MHz

===== CHANNEL f2 =====
CPDPRG2 waltz16
NUC2 1H
PCPD2 80.00 usec
PL2 -1.00 dB
PL12 14.50 dB
PL13 14.50 dB
PLW 10.56200695 W
PL12X 0.29767781 W
PL13X 0.29767781 W
SFO2 400.1316005 MHz
SI 32768
SF 100.6127527 MHz
WDW EM
SSE 0
LB 5.00 Hz
GB 0
PC 1.40

```

Figure S44.  $^{13}\text{C}\{^1\text{H}\}$  NMR spectrum of 1S,2S,5R-2b in  $\text{CDCl}_3$ .

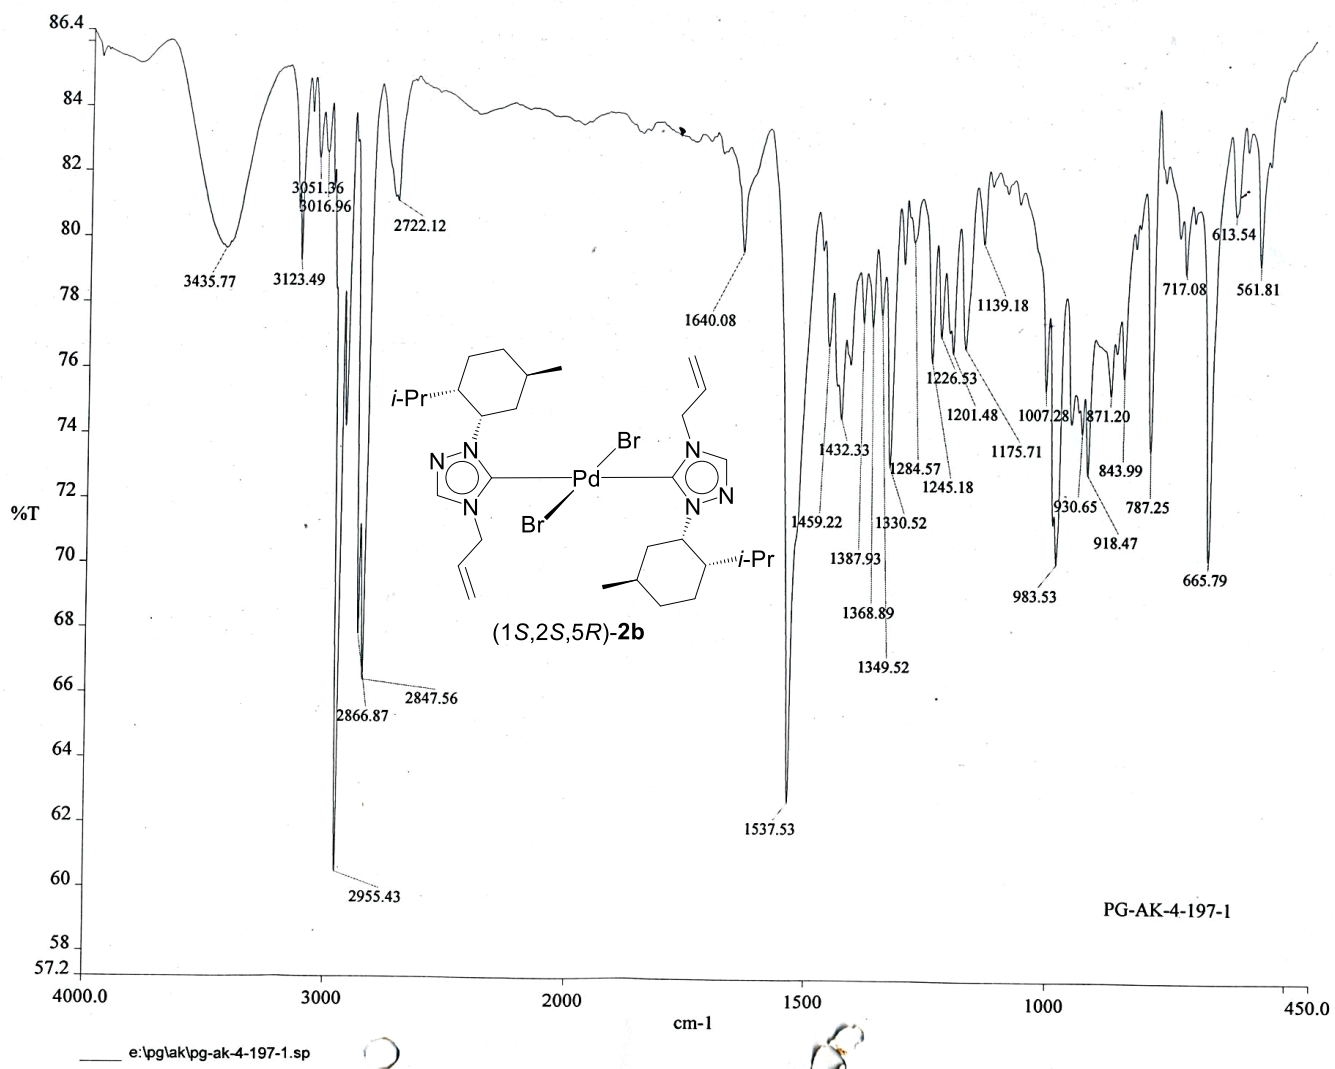

Figure S45. Infrared spectrum of 1S,2S,5R-2b in KBr.

DEPARTMENT OF CHEMISTRY, I.I.T.(B)

Analysis Info

Analysis Name D:\Data\FEB-2016\PG-AK-04-197.d  
 Method Tune\_pos\_NAICSI-2000.m  
 Sample Name PG-AK-04-197  
 Comment C30H50N6PdBr2

Acquisition Date 2/22/2016 9:18:40 PM

Operator PG APP IN  
 Instrument maXis impact 282001.00081

Acquisition Parameter

|             |          |                       |            |                  |           |
|-------------|----------|-----------------------|------------|------------------|-----------|
| Source Type | ESI      | Ion Polarity          | Positive   | Set Nebulizer    | 0.3 Bar   |
| Focus       | Active   | Set Capillary         | 3800 V     | Set Dry Heater   | 180 °C    |
| Scan Begin  | 50 m/z   | Set End Plate Offset  | -500 V     | Set Dry Gas      | 4.0 l/min |
| Scan End    | 2000 m/z | Set Collision Cell RF | 2100.0 Vpp | Set Divert Valve | Source    |

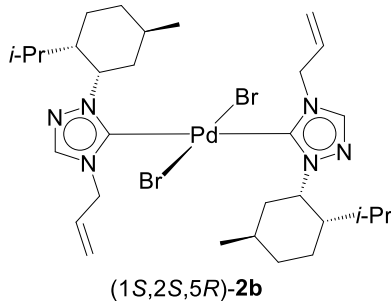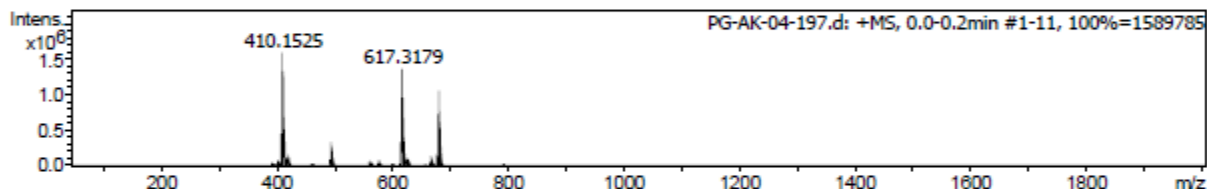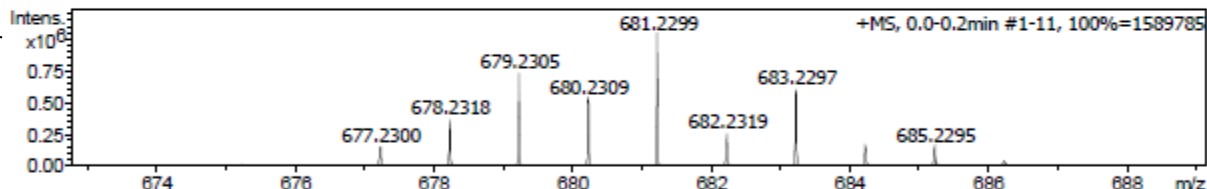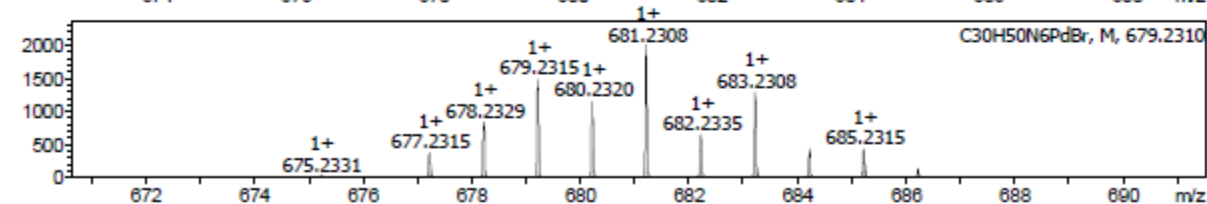

| Meas. m/z | # | Ion Formula  | m/z      | err [ppm] | mSigma | # Sigma | Score  | rdb | e <sup>-</sup> Conf | N-Rule |
|-----------|---|--------------|----------|-----------|--------|---------|--------|-----|---------------------|--------|
| 681.2299  | 1 | C30H50BrN6Pd | 679.2315 | -1.3      | 50.7   | 1       | 100.00 | 8.5 | even                | ok     |

Figure S46. High Resolution Mass Spectrometry (HRMS) data of 1S,2S,5R-2b.

# Eager 300 Report

Page: 1 Sample: PG-AK-4-197-2 (PG-AK-4-197-2)

Method Name : SP-050312  
 Method File : D:\CHNS2012\SP-050312.mth  
 Chromatogram : PG-AK-4-197-2  
 Operator ID : MNRAO  
 Analysed : 03/05/2012 18:24  
 Sample ID : PG-AK-4-197-2 (# 23)  
 Analysis Type : UnkNown (Area)

Company Name : C.E. Instruments  
 Printed : 3/5/2012 19:58  
 Instrument N. : Instrument #1  
 Sample weight : .755

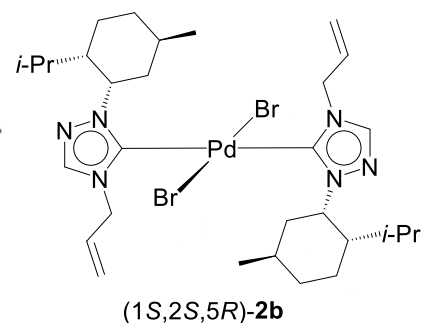

Calib. method : using 'K Factors'

!!! Warning missing one or more peaks.

| Element Name | %       | Ret.Time | Area    | BC | Area ratio | K factor    |
|--------------|---------|----------|---------|----|------------|-------------|
| Nitrogen     | 11.1258 | 44       | 113335  | FU | 8.001876   | .134923E+07 |
| Carbon       | 47.7199 | 68       | 906896  | FU | 1.000000   | .251716E+07 |
| Hydrogen     | 6.5555  | 178      | 283533  | RS | 3.198556   | .572859E+07 |
| Totals       | 65.4013 |          | 1303765 |    |            |             |

Figure S47. Elemental analysis data of 1S,2S,5R-2b.



[Comment]  
 Sample name  
 Comment  
 User  
 Division  
 Company IITB

[Data Information]  
 Creation Date 6/10/2013 3 53 PM

[Measurement Information]  
 Instrument Name JASCO POLARIMETER  
 Model Name P-2000  
 Serial No A043361232  
 Polarizer Dichrom  
 Faraday Cell Flint Glass

Accessory PTC-203  
 Accessory S/N A017861234  
 Path Length 100 mm

Light Source Na  
 Monitor wavelength 589 nm  
 D I T 5 sec  
 No of cycle 5  
 Cycle interval 5 sec  
 Temp Monitor Cell  
 Temp Corr Factor None  
 Aperture(S) 3.0mm  
 Aperture(L) Auto  
 Mode Specific O R  
 Path Length 100 mm  
 Concentration 1 w/v  
 Factor 1

[Comment]  
 Sample name  
 Comment  
 User  
 Division  
 Company IITB

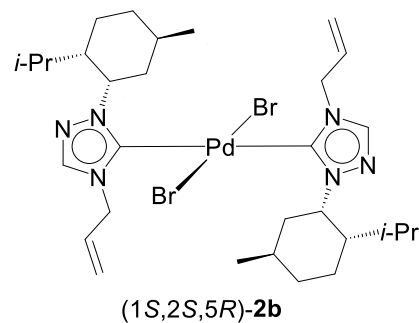

| No | Sample No | Mode          | Calc Data    | Meas Data | Temperature(C) | Comment |                   |
|----|-----------|---------------|--------------|-----------|----------------|---------|-------------------|
| 1  | 1         | PG-AK-6-150-1 | Specific O R | -41.6360  | -0.4164        | 24.99   | CHCl <sub>3</sub> |
| 2  | 2         | PG-AK-6-150-2 | Specific O R | -41.7160  | -0.4172        | 24.99   | CHCl <sub>3</sub> |
| 3  | 3         | PG-AK-6-150-3 | Specific O R | -41.7260  | -0.4173        | 24.99   | CHCl <sub>3</sub> |
| 4  | 4         | PG-AK-6-150-4 | Specific O R | -41.4760  | -0.4148        | 24.99   | CHCl <sub>3</sub> |
| 5  | 5         | PG-AK-6-150-5 | Specific O R | -41.8560  | -0.4186        | 24.99   | CHCl <sub>3</sub> |
| 6  | 6         | Avg           |              | -41.6820  |                |         |                   |
| 7  | 7         | S D           |              | 0.1396    |                |         |                   |
| 8  | 8         | C V           |              | 0.3348    |                |         |                   |

**Figure S48.** Specific rotation of 1S,2S,5R-2b in CHCl<sub>3</sub>.

NAME PG-AK-11-222-1-1  
 EXPNO 4  
 PROCNO 1  
 Date\_ 20151017  
 Time 0.46  
 INSTRUM spect  
 PROBHD 5 mm PABBO BB-  
 PULPROG zg30  
 TD 54274  
 SOLVENT CDCl3  
 NS 16  
 DS 0  
 SWH 8223.685 Hz  
 FIDRES 0.151522 Hz  
 AQ 3.2999091 sec  
 RG 101  
 DW 60.800 usec  
 DE 6.50 usec  
 TE 295.4 K  
 D1 1.0000000 sec  
 TD0 1

PG-AK-11-222-1-1H

===== CHANNEL f1 =====  
 NUC1 1H  
 P1 14.75 usec  
 PL1 -1.00 dB  
 PL1W 10.56200695 W  
 SFO1 400.1324710 MHz  
 SI 32768  
 SF 400.1300098 MHz  
 WDW EM  
 SSB 0  
 LB 0.30 Hz  
 GB 0  
 PC 1.00

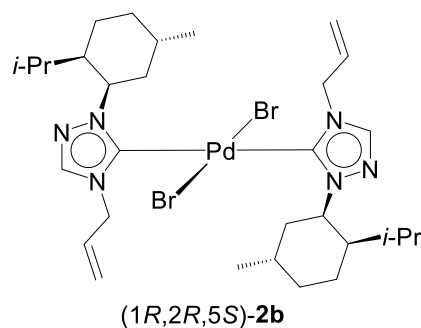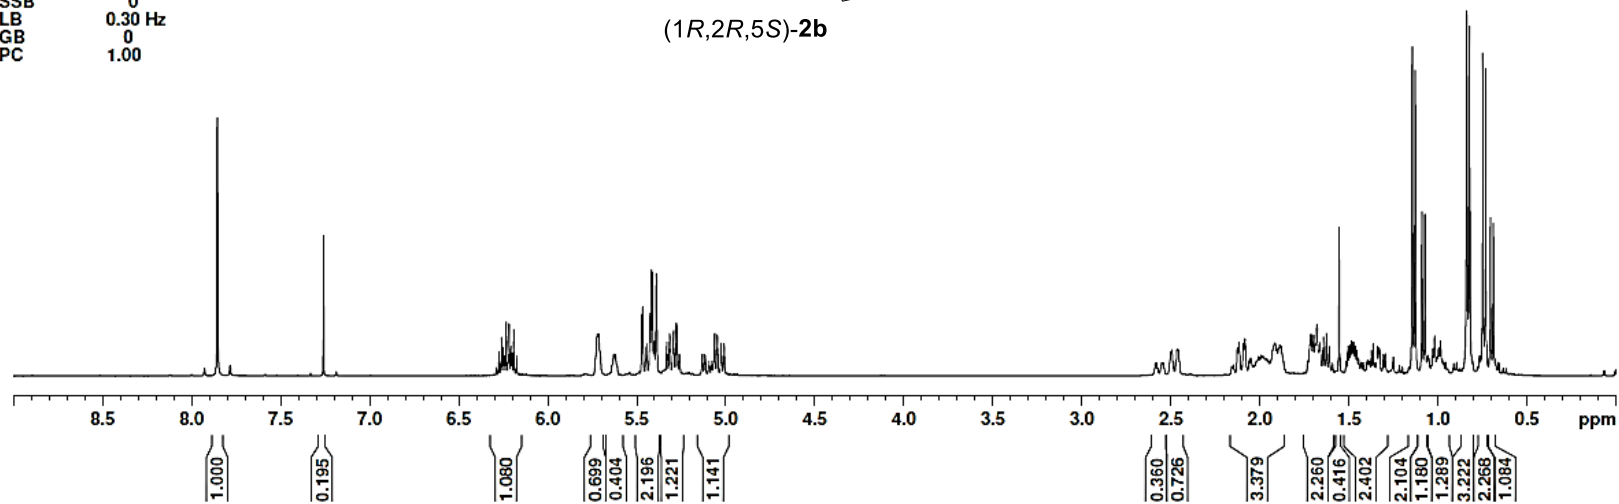

Figure S49. <sup>1</sup>H NMR spectrum of (1*R*,2*R*,5*S*)-**2b** in CDCl<sub>3</sub>.

PG-AK-11-222-1-13C

```

NAME      PG-AK-11-222-1-13C
EXPNO     5
PROCNO    1
Date_     20151017
Time      0.51
INSTRUM   spect
PROBHD    5 mm PABBO BB-
PULPROG   zgpg30
TD        65536
SOLVENT   CDCl3
NS        421
DS        4
SWH       26041.666 Hz
FIDRES    0.397364 Hz
AQ        1.2583412 sec
RG        2050
DW        19.200 usec
DE        6.50 usec
TE        296.3 K
D1        1.00000000 sec
D11       0.03000000 sec
TD0       1
  
```

```

===== CHANNEL f1 =====
NUC1      13C
P1        8.50 usec
PL1       -2.00 dB
PL1W      56.53121948 W
SFO1      100.6238364 MHz
  
```

```

===== CHANNEL f2 =====
CPDPRG2   waltz16
NUC2      1H
PCPD2     80.00 usec
PL2       -1.00 dB
PL12      13.69 dB
PL13      14.50 dB
PL2W      10.56200695 W
PL12W     0.35871249 W
PL13W     0.29767781 W
SFO2      400.1316005 MHz
SI        32768
SF        100.6127516 MHz
WDW       EM
SSB       0
LB        1.00 Hz
GB        0
PC        1.40
  
```

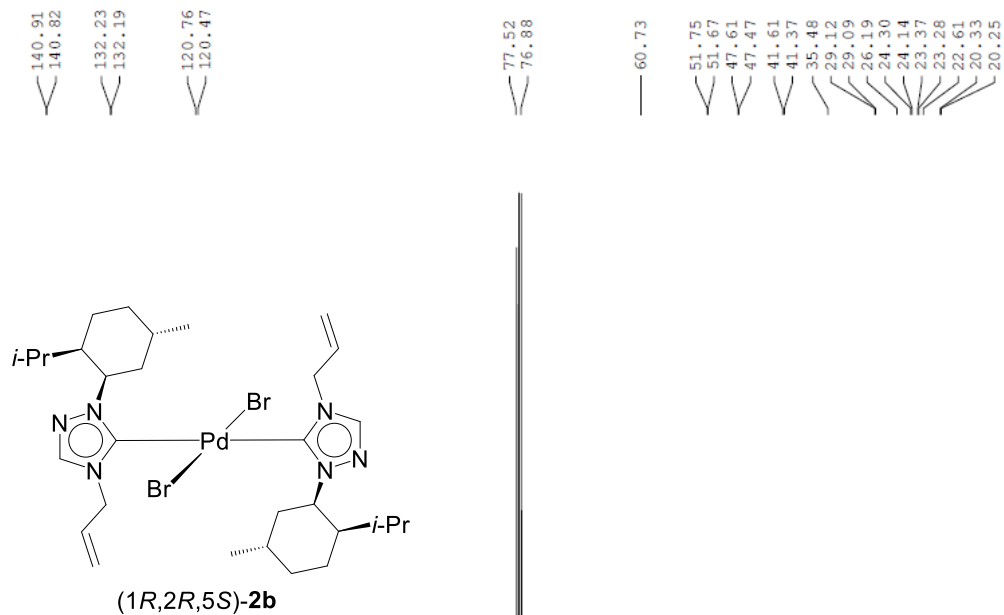

Figure S50.  $^{13}\text{C}\{^1\text{H}\}$  NMR spectrum of (1R,2R,5S)-2b in  $\text{CDCl}_3$ .

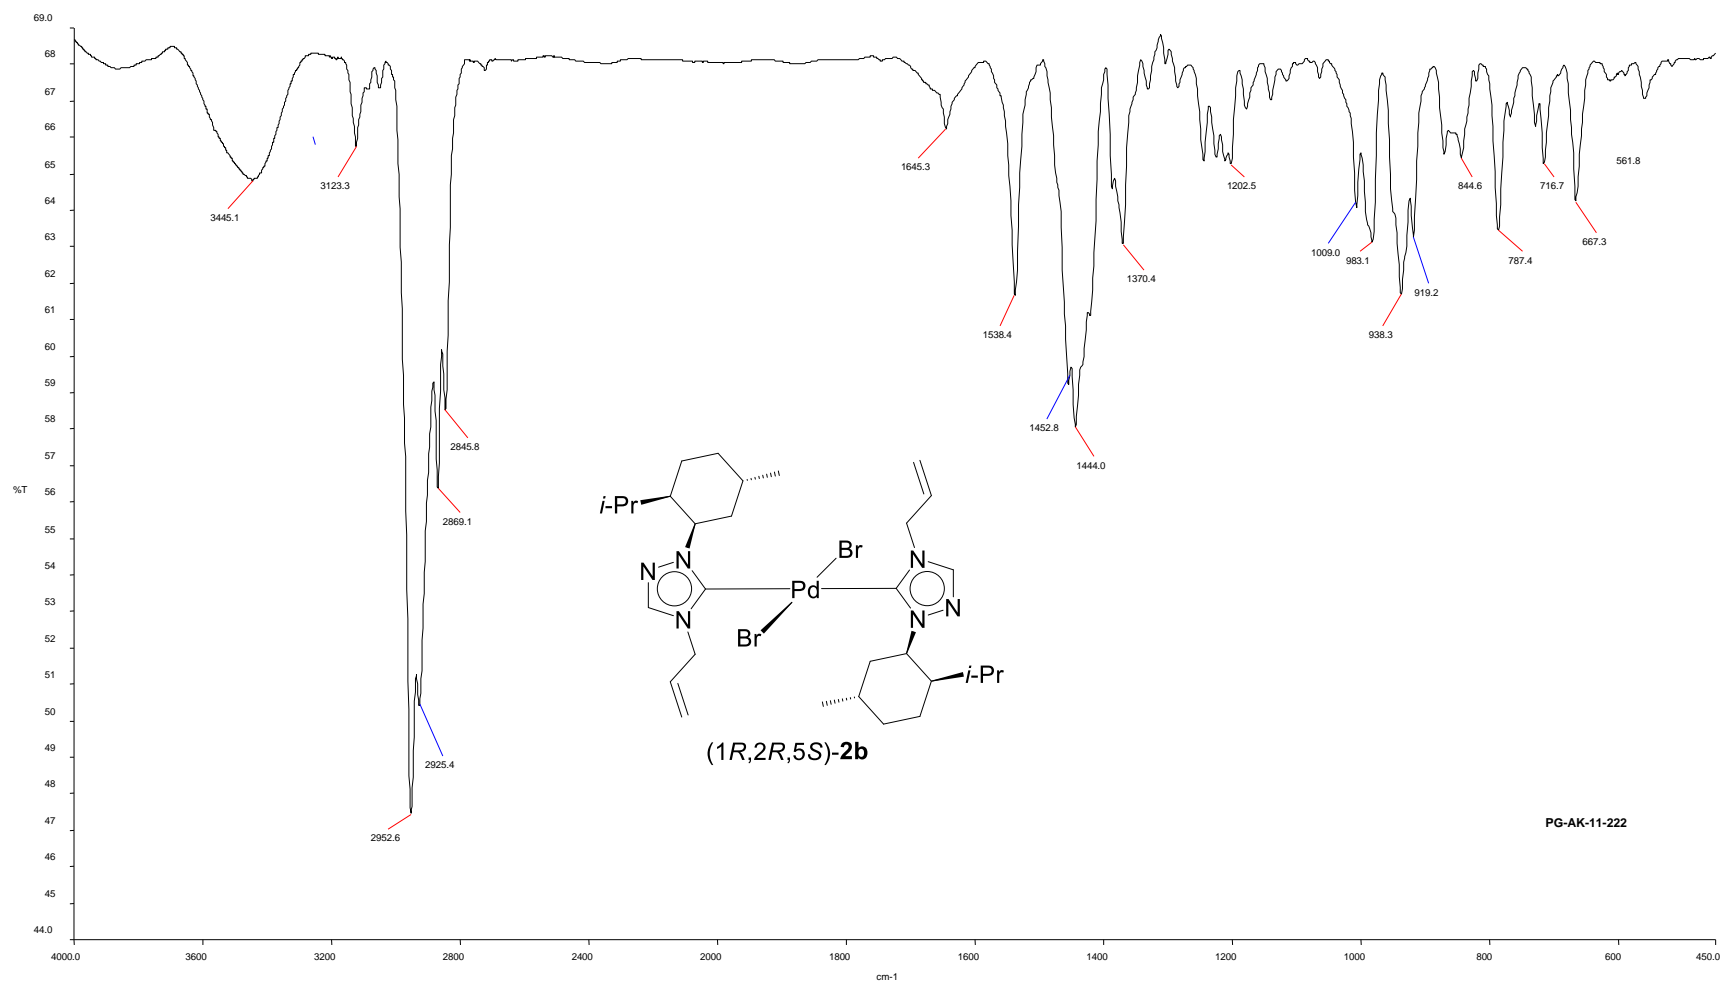

PG-AK-11-222

**Figure S51.** Infrared spectrum of 1R,2R,5S-2b in KBr.

DEPARTMENT OF CHEMISTRY, I.I.T.(B)

**Analysis Info**

Analysis Name D:\Data\FEB-2016\PG-AK-11-222.d  
 Method Tune\_pos\_NAICSI-2000.m  
 Sample Name PG-AK-11-222  
 Comment C30H50N6PdBr2

Acquisition Date 2/22/2016 9:17:19 PM

Operator PG APP IN  
 Instrument maXis impact 282001.00081

**Acquisition Parameter**

|             |          |                       |            |                  |           |
|-------------|----------|-----------------------|------------|------------------|-----------|
| Source Type | ESI      | Ion Polarity          | Positive   | Set Nebulizer    | 0.3 Bar   |
| Focus       | Active   | Set Capillary         | 3800 V     | Set Dry Heater   | 180 °C    |
| Scan Begin  | 50 m/z   | Set End Plate Offset  | -500 V     | Set Dry Gas      | 4.0 l/min |
| Scan End    | 2000 m/z | Set Collision Cell RF | 2100.0 Vpp | Set Divert Valve | Source    |

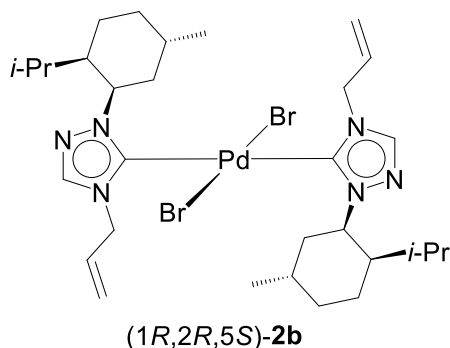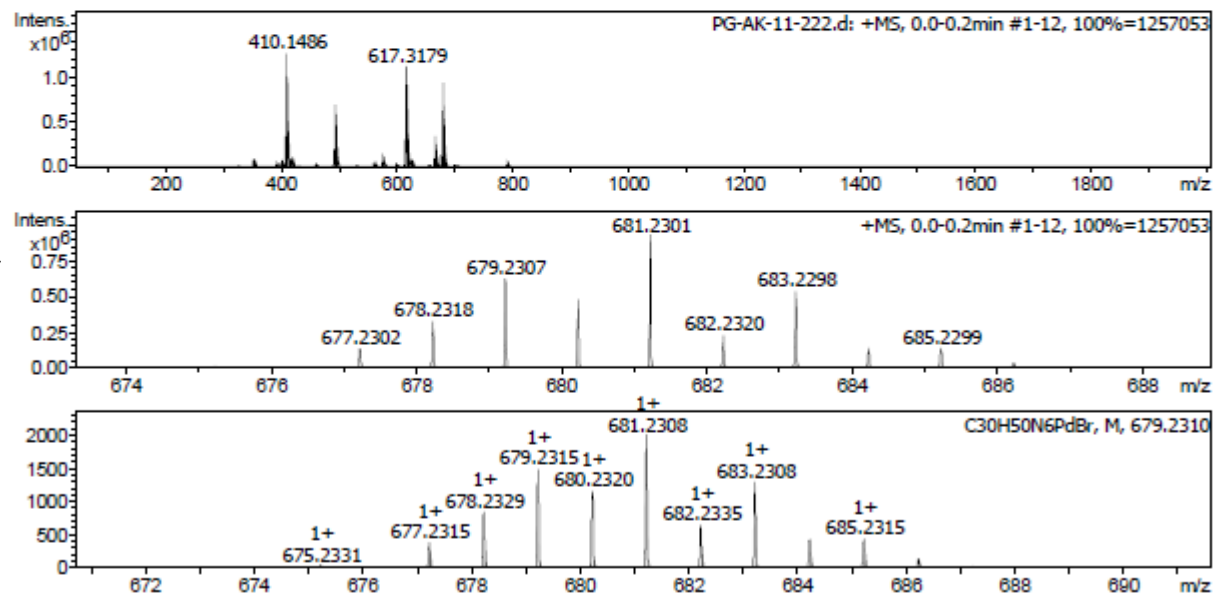

| Meas. m/z | # | Ion Formula  | m/z      | err [ppm] | mSigma | # Sigma | Score  | rdB | e <sup>-</sup> Conf | N-Rule |
|-----------|---|--------------|----------|-----------|--------|---------|--------|-----|---------------------|--------|
| 681.2301  | 1 | C30H50BrN6Pd | 679.2315 | -1.0      | 52.8   | 1       | 100.00 | 8.5 | even                | ok     |

**Figure S52.** High Resolution Mass Spectrometry (HRMS) data of **1R,2R,5S-2b**.

# Eager 300 Report

Page: 1 Sample: PG-AK-11-222-2 (PG-AK-11-222-2)

Method Name : PGCP13102015  
Method File : D:\CHNS-2015\PGCP13102015.mth  
Chromatogram : PG-AK-11-222-2  
Operator ID : CHANDNI  
Analysed : 10/13/2015 13:17  
Sample ID : PG-AK-11-222-2 (# 13)  
Analysis Type : UnkNown (Area)

Company Name : C.E. Instruments  
Printed : 10/13/2015 18:36  
Instrument N. : Instrument #1  
Sample weight : .784

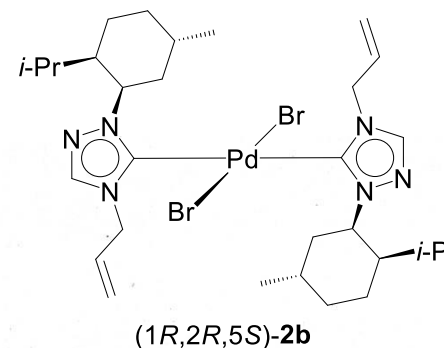

Calib. method : using 'K Factors'

!!! Warning missing one or more peaks.

| Element Name | %       | Ret.Time | Area    | BC | Area ratio | K factor    |
|--------------|---------|----------|---------|----|------------|-------------|
| Nitrogen     | 11.1318 | 41       | 94512   | RS | 10.356680  | .108295E+07 |
| Carbon       | 47.7544 | 64       | 978831  | RS | 1.000000   | .260680E+07 |
| Hydrogen     | 6.3743  | 175      | 347305  | RS | 2.818360   | .665180E+07 |
| Totals       | 65.2604 |          | 1420648 |    |            |             |

Figure S53. Elemental analysis data of (1R,2R,5S)-2b.

CENTRAL FACILITY LAB CHEMISTRY DEPT. IIT MUMBAI

Monday, 12-OCT-2015

This sample was measured on an Autopol IV, Serial #82083  
Manufactured by Rudolph Research Analytical, Hackettstown, NJ, USA.

Lot ID : pg

Set Temperature : 25.0  
Time Delay : Disabled  
Temperature Correction : OFF

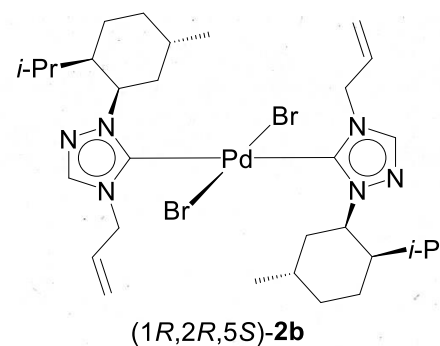

| <u>n</u>    | <u>Average</u>   | <u>Std.Dev.</u> | <u>Maximum</u> | <u>Minimum</u> |                |            |              |              |              |
|-------------|------------------|-----------------|----------------|----------------|----------------|------------|--------------|--------------|--------------|
| 5           | 39.430           | 0.1341          | 39.639         | 39.340         |                |            |              |              |              |
| <u>S.No</u> | <u>Sample ID</u> | <u>Time</u>     | <u>Result</u>  | <u>Scale</u>   | <u>OR °Arc</u> | <u>WLG</u> | <u>Lg.mm</u> | <u>Conc.</u> | <u>Temp.</u> |
| 1           | pg-ak-11-222-1   | 12:20:47        | 39.340         | SR             | 0.197          | 589        | 50           | 1            | 25.1         |
| 2           | pg-ak-11-222-1   | 12:20:54        | 39.340         | SR             | 0.197          | 589        | 50           | 1            | 25.1         |
| 3           | pg-ak-11-222-1   | 12:21:00        | 39.340         | SR             | 0.197          | 589        | 50           | 1            | 25.1         |
| 4           | pg-ak-11-222-1   | 12:21:07        | 39.493         | SR             | 0.197          | 589        | 50           | 1            | 25.1         |
| 5           | pg-ak-11-222-1   | 12:21:19        | 39.639         | SR             | 0.198          | 589        | 50           | 1            | 25.1         |

Figure S54. Specific rotation of (1R,2R,5S)-2b in CHCl<sub>3</sub>.

NAME PG-AK-11-223-1-1  
EXPNO 1  
PROCNO 1  
Date\_ 20151017  
Time 0.08  
INSTRUM spect  
PROBHD 5 mm PABBO BB-  
PULPROG zg30  
TD 54274  
SOLVENT CDCl3  
NS 10  
DS 0  
SWH 8223.685 Hz  
FIDRES 0.151522 Hz  
AQ 3.2999091 sec  
RG 114  
DW 60.800 usec  
DE 6.50 usec  
TE 295.3 K  
D1 1.0000000 sec  
TD0 1

PG-AK-11-223-1-1H

==== CHANNEL f1 =====  
NUC1 1H  
P1 14.75 usec  
PL1 -1.00 dB  
PL1W 10.56200695 W  
SFO1 400.1324710 MHz  
SI 32768  
SF 400.1300095 MHz  
WDW EM  
SSB 0  
LB 0.30 Hz  
GB 0  
PC 1.00

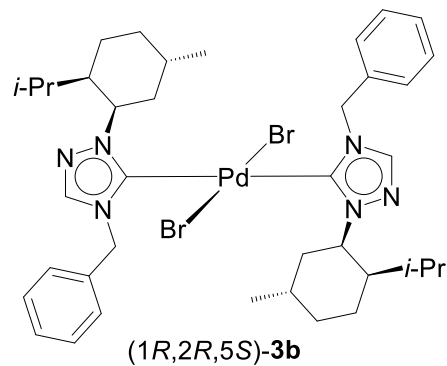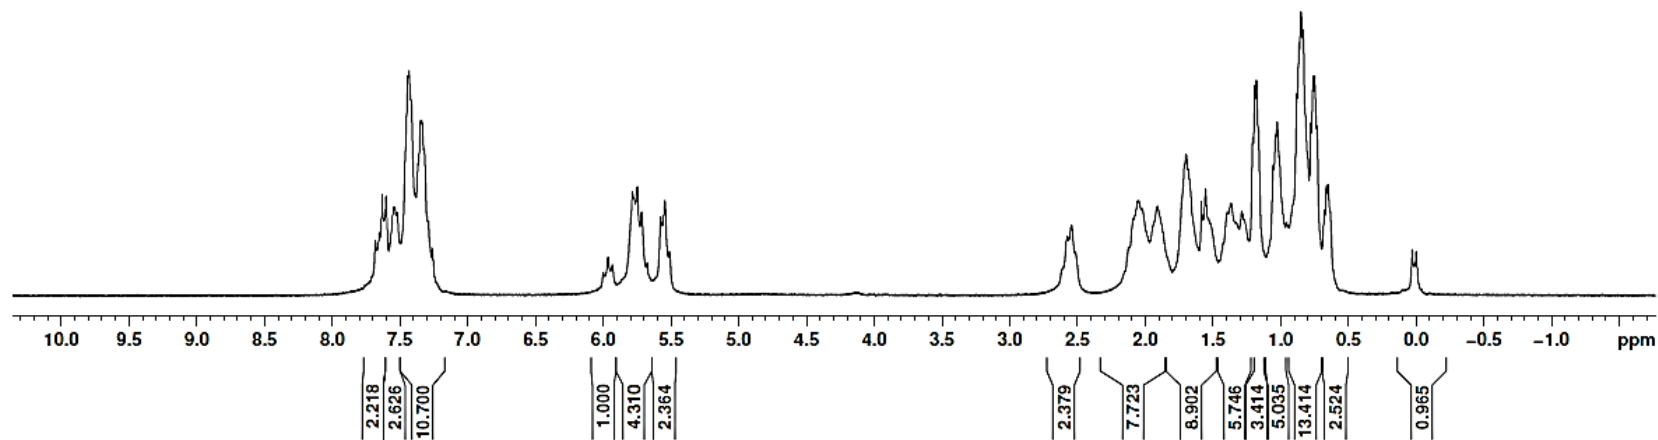

Figure S55.  $^1\text{H}$  NMR spectrum of (1R,2R,5S)-3b in  $\text{CDCl}_3$ .



PG-AK-11-223-13C

```

NAME      PG-AK-11-223-13C
EXPNO     1
PROCNO    1
Date_     20151018
Time      20.46
INSTRUM   spect
PROBHD    5 mm PABBO BB-
PULPROG   zgpg30
TD        65536
SOLVENT   CDCl3
NS        1209
DS        4
SWH       26041.666 Hz
FIDRES    0.397364 Hz
AQ        1.2583412 sec
RG        2050
DW        19.200 usec
DE        6.50 usec
TE        295.6 K
D1        1.00000000 sec
D11       0.03000000 sec
TD0       1
  
```

```

===== CHANNEL f1 =====
NUC1      13C
P1        8.50 usec
PL1       -2.00 dB
PL1W      56.53121948 W
SFO1     100.6238364 MHz
  
```

```

===== CHANNEL f2 =====
CPDPRG2   waltz16
NUC2      1H
PCPD2     80.00 usec
PL2       -1.00 dB
PL12     13.69 dB
PL13     14.50 dB
PL2W     10.56200695 W
PL12W    0.35871249 W
PL13W    0.29767781 W
SFO2     400.1316005 MHz
SI        32768
SF        100.6127528 MHz
WDW       EM
SSB       0
LB        1.00 Hz
GB        0
PC        1.40
  
```

172.50  
172.46

140.99  
140.86  
134.75  
134.63  
129.30  
129.23  
129.20  
129.00  
128.85  
128.80

77.51  
77.19  
76.88

60.78  
52.80  
52.76  
47.64  
47.35  
41.47  
41.36  
35.49  
35.44  
29.16  
29.07  
26.22  
26.18  
24.18  
23.93  
23.33  
22.63  
22.59  
20.27  
20.13

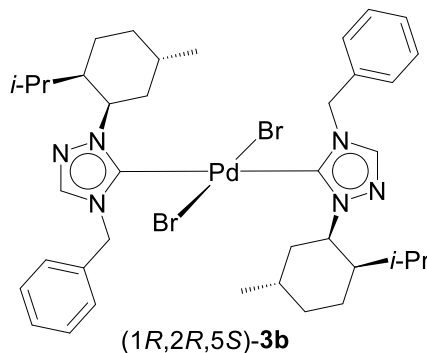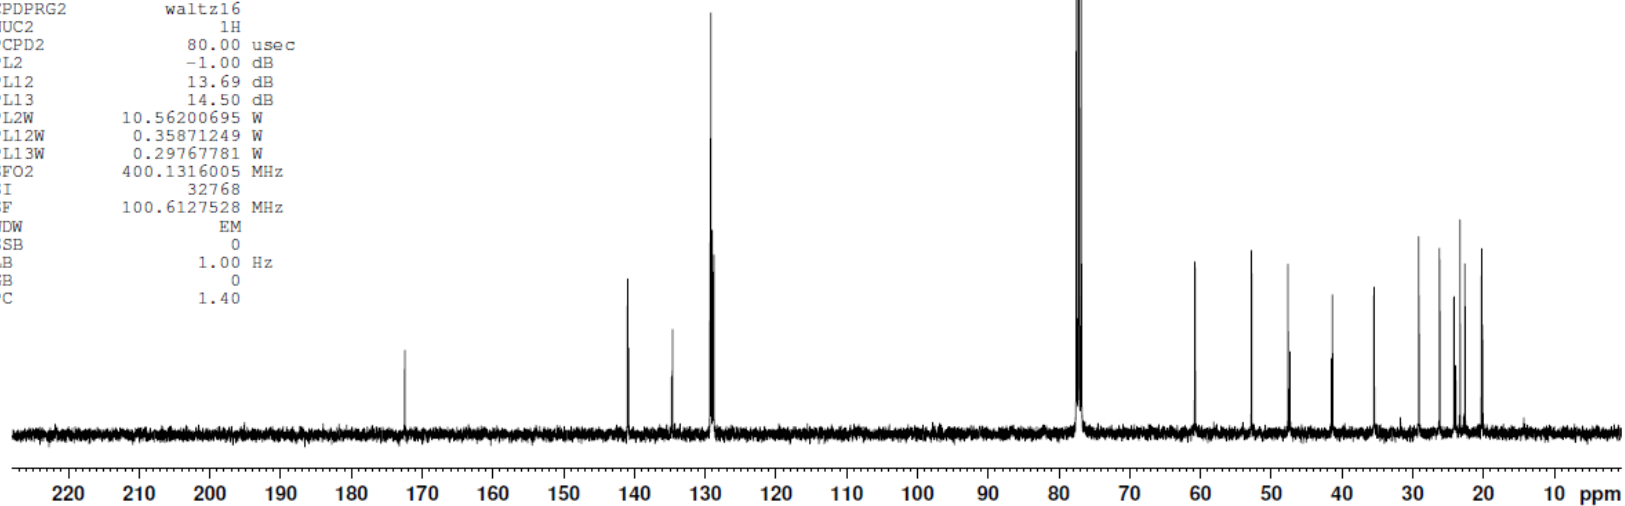

Figure S56.  $^{13}\text{C}\{^1\text{H}\}$  NMR spectrum of (1R,2R,5S)-3b in  $\text{CDCl}_3$ .

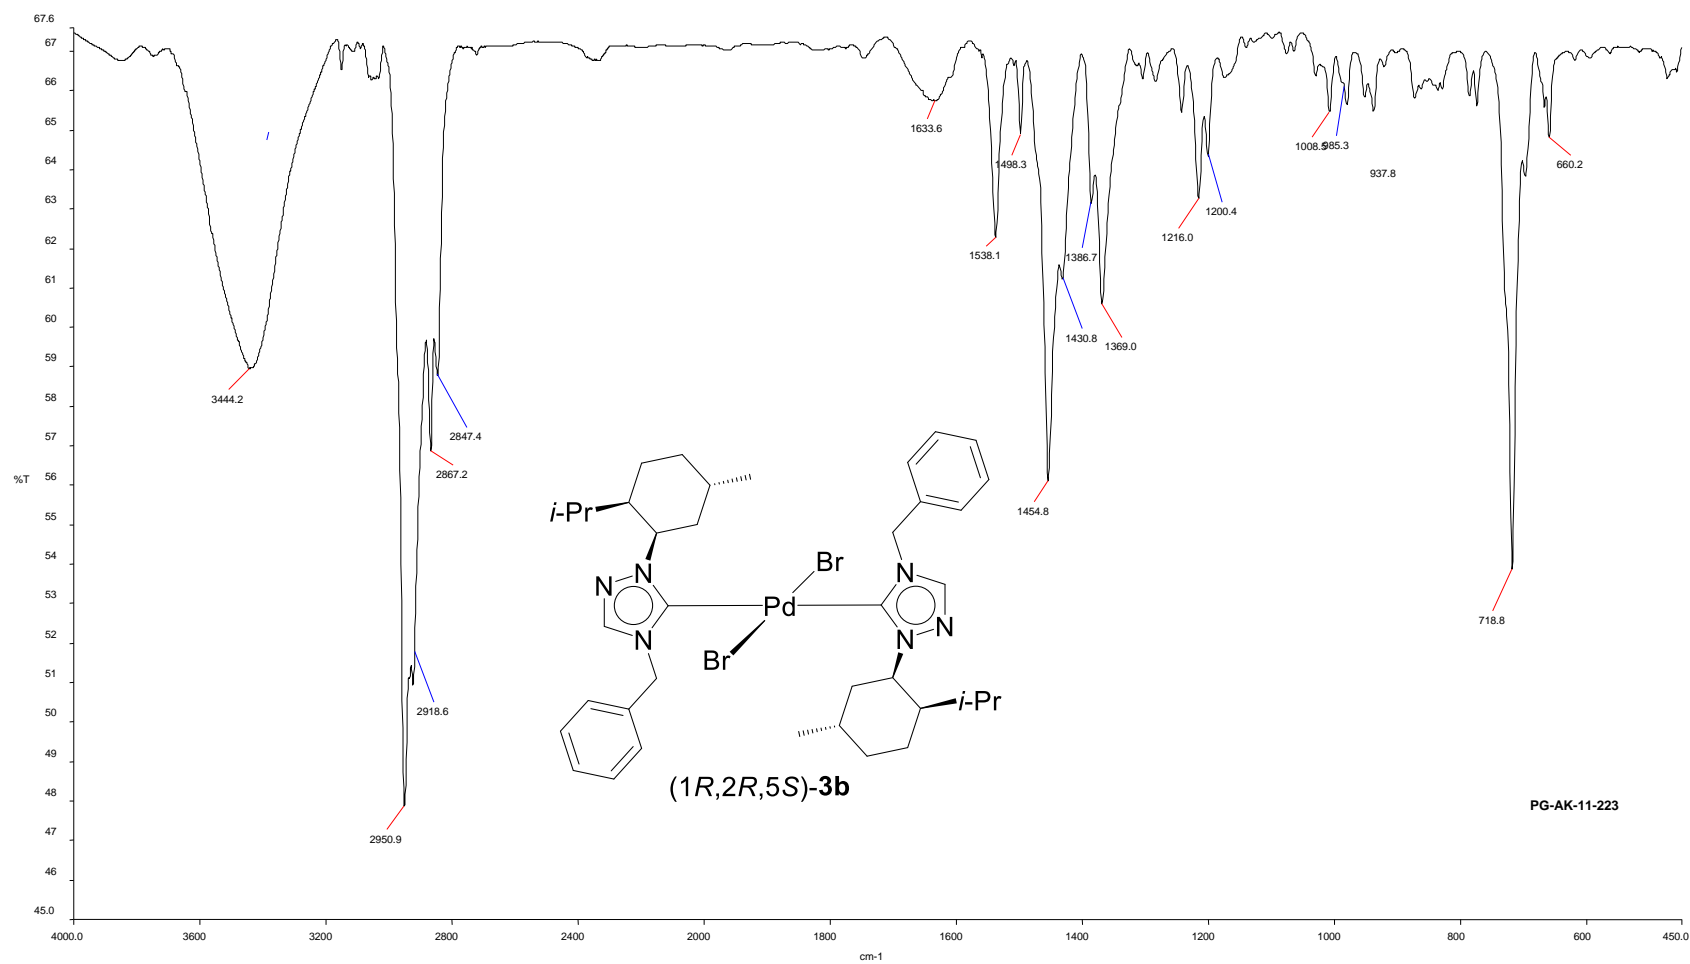

PG-AK-11-223

Figure S57. Infrared spectrum of 1R,2R,5S-3b in KBr.

DEPARTMENT OF CHEMISTRY, I.I.T.(B)

Analysis Info

Analysis Name D:\Data\FEB-2016\PG-DK-11-223-1.d  
 Method Tune\_pos\_NAICSI-1000a.m  
 Sample Name PG-DK-11-223-1  
 Comment C38H54N6PdBr2

Acquisition Date 2/22/2016 11:36:27 AM

Operator PG APP IN  
 Instrument maXis impact 282001.00081

Acquisition Parameter

|             |          |                       |            |                  |           |
|-------------|----------|-----------------------|------------|------------------|-----------|
| Source Type | ESI      | Ion Polarity          | Positive   | Set Nebulizer    | 0.3 Bar   |
| Focus       | Active   | Set Capillary         | 3700 V     | Set Dry Heater   | 180 °C    |
| Scan Begin  | 50 m/z   | Set End Plate Offset  | -500 V     | Set Dry Gas      | 4.0 l/min |
| Scan End    | 1000 m/z | Set Collision Cell RF | 1200.0 Vpp | Set Divert Valve | Source    |

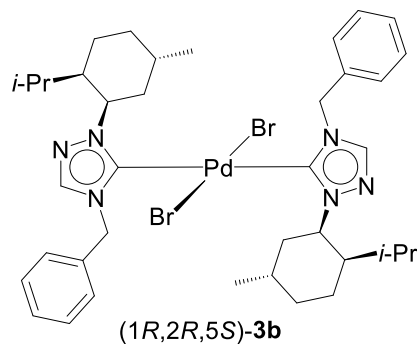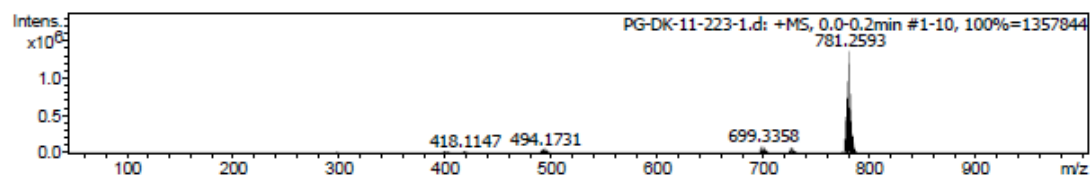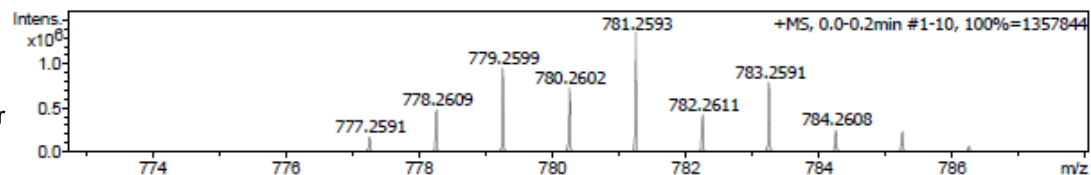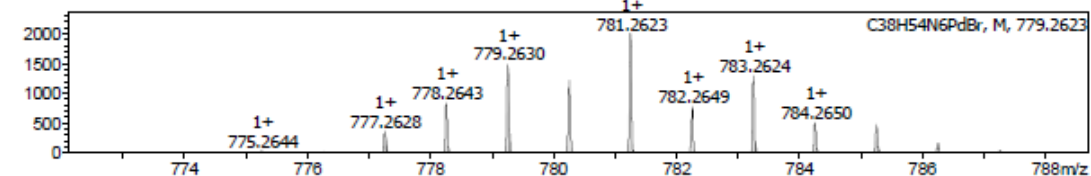

| Meas. m/z | # | Ion Formula | m/z      | err [ppm] | mSigma | # Sigma | Score  | rdb  | e <sup>-</sup> Conf | N-Rule |
|-----------|---|-------------|----------|-----------|--------|---------|--------|------|---------------------|--------|
| 781.2593  | 1 | C38H54N6Pd  | 779.2630 | -3.9      | 50.7   | 1       | 100.00 | 14.5 | even                | ok     |

Figure S58. High Resolution Mass Spectrometry (HRMS) data of 1R,2R,5S-3b.

## Eager 300 Report

Page: 1    Sample: PG-AK-11-223-2 (PG-AK-11-223-2)

Method Name : PGCP13102015

Method File : D:\CHNS-2015\PGCP13102015.mth

Chromatogram : PG-AK-11-223-2

Operator ID : CHANDNI

Analysed : 10/13/2015 13:37

Sample ID : PG-AK-11-223-2 (# 15)

Analysis Type : UnkNown (Area)

Company Name : C.E. Instruments

Printed : 10/13/2015 18:36

Instrument N. : Instrument #1

Sample weight : 1.004

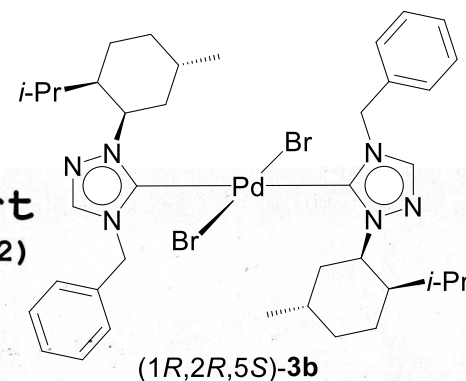

Calib. method : using 'K Factors'

!!! Warning missing one or more peaks.

| Element Name | %       | Ret.Time | Area    | BC | Area ratio | K factor    |
|--------------|---------|----------|---------|----|------------|-------------|
| Nitrogen     | 9.5675  | 41       | 104025  | RS | 13.525010  | .108295E+07 |
| Carbon       | 53.6476 | 63       | 1406939 | RS | 1.000000   | .260680E+07 |
| Hydrogen     | 6.2084  | 178      | 429505  | RS | 3.275722   | .665180E+07 |
| Totals       | 69.4235 |          | 1940469 |    |            |             |

Figure S59. Elemental analysis data of (1R,2R,5S)-3b.

CENTRAL FACILITY LAB CHEMISTRY DEPT. IIT MUMBAI

Monday, 12-OCT-2015

This sample was measured on an Autopol IV, Serial #82083  
Manufactured by Rudolph Research Analytical, Hackettstown, NJ, USA.

Lot ID : pg

Set Temperature : 25.0  
Time Delay : Disabled  
Temperature Correction : OFF

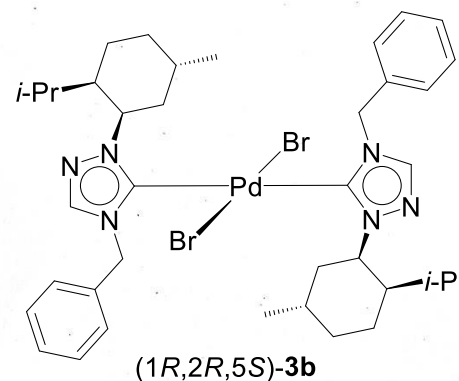

| <u>n</u>    | <u>Average</u>   | <u>Std.Dev.</u> | <u>Maximum</u> | <u>Minimum</u> |                |            |              |              |              |
|-------------|------------------|-----------------|----------------|----------------|----------------|------------|--------------|--------------|--------------|
| <u>S.No</u> | <u>Sample ID</u> | <u>Time</u>     | <u>Result</u>  | <u>Scale</u>   | <u>OR °Arc</u> | <u>WLG</u> | <u>Lg.mm</u> | <u>Conc.</u> | <u>Temp.</u> |
| 5           | 44.991           | 0.0000          | 44.991         | 44.991         |                |            |              |              |              |
| 1           | pg-ak-11-223-1   | 12:13:09        | 44.991         | SR             | 0.225          | 589        | 50           | 1            | 24.9         |
| 2           | pg-ak-11-223-1   | 12:13:16        | 44.991         | SR             | 0.225          | 589        | 50           | 1            | 24.9         |
| 3           | pg-ak-11-223-1   | 12:13:23        | 44.991         | SR             | 0.225          | 589        | 50           | 1            | 24.9         |
| 4           | pg-ak-11-223-1   | 12:13:29        | 44.991         | SR             | 0.225          | 589        | 50           | 1            | 24.9         |
| 5           | pg-ak-11-223-1   | 12:13:36        | 44.991         | SR             | 0.225          | 589        | 50           | 1            | 24.9         |

Figure S60. Specific rotation of (1R,2R,5S)-3b in CHCl<sub>3</sub>.

Current Data Parameters  
NAME PG-AK-9-97-1-1H  
EXPNO 8  
PROCNO 1

F2 - Acquisition Parameters  
Date\_ 20140327  
Time 21.46  
INSTRUM spect  
PROBHD 5 mm PABBO BB/  
PULPROG zg30  
TD 65536  
SOLVENT CDCl3  
NS 12  
DS 2  
SWH 10000.000 Hz  
FIDRES 0.152588 Hz  
AQ 3.2767999 sec  
RG 134.65  
DW 50.000 usec  
DE 6.50 usec  
TE 297.8 K  
D1 1.00000000 sec  
TD0 1

===== CHANNEL f1 =====  
SFO1 500.1330885 MHz  
NUC1 1H  
P1 13.00 usec  
PLW1 13.00000000 W

F2 - Processing parameters  
SI 65536  
SF 500.1300000 MHz  
WDW EM  
SSB 0  
LB 0.30 Hz  
GB 0  
PC 1.00

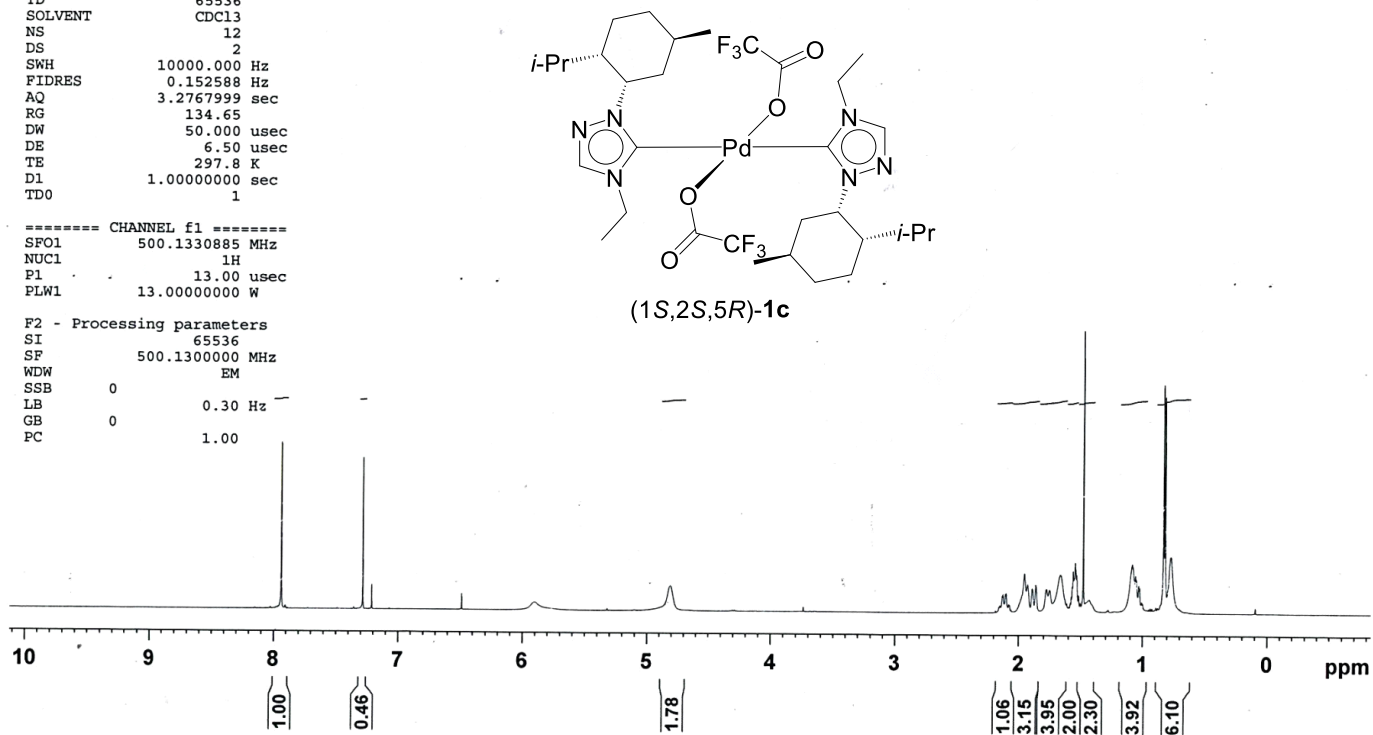

Figure S61. <sup>1</sup>H NMR spectrum of 1S,2S,5R-1c in CDCl<sub>3</sub>.

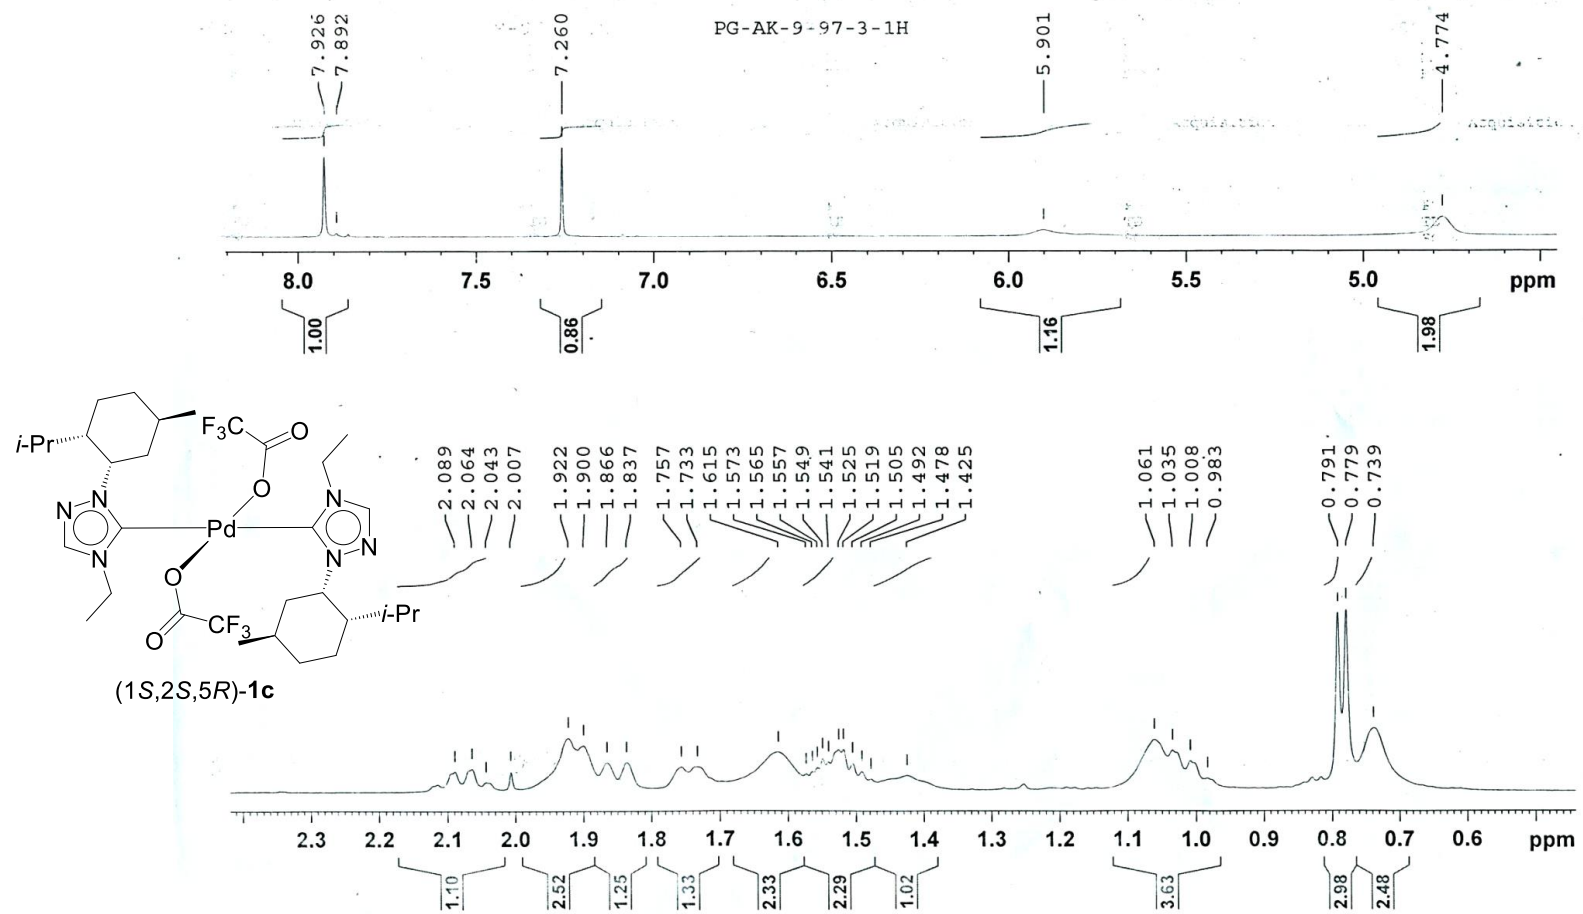

Figure S62. Expanded  $^1\text{H}$  NMR spectrum of 1S,2S,5R-1c in  $\text{CDCl}_3$ .

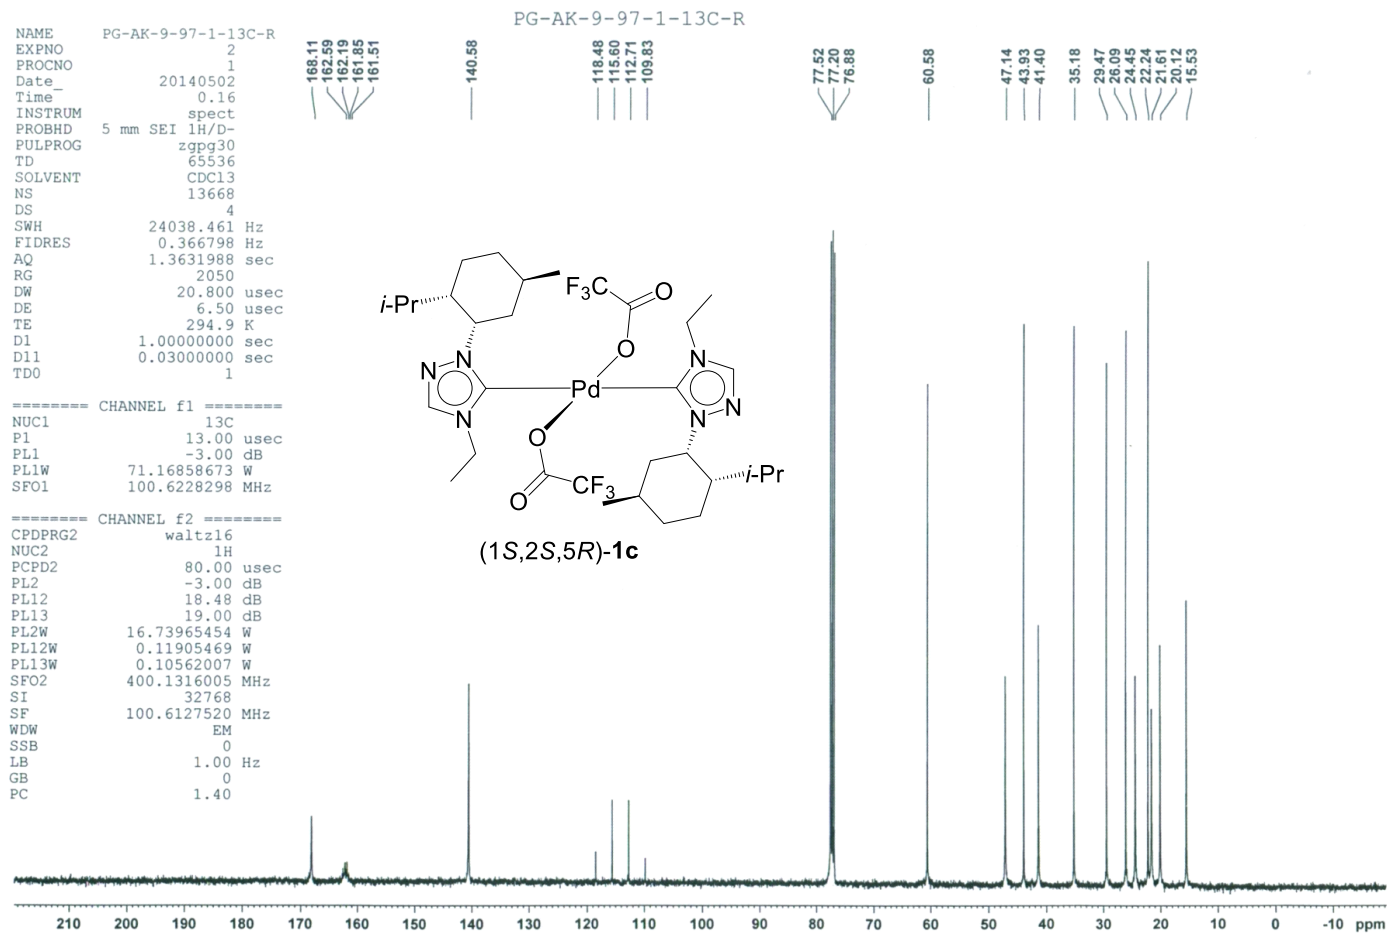

Figure S63.  $^{13}\text{C}\{^1\text{H}\}$  NMR spectrum of 1S,2S,5R-1c in  $\text{CDCl}_3$ .



Current Data Parameters  
NAME PG-AK-9-97-1-19F  
EXPNO 9  
PROCNO 1

F2 - Acquisition Parameters  
Date\_ 20140327  
Time 21.49  
INSTRUM spect  
PROBHD 5 mm PABBO BB/  
PULPROG zgflqn  
TD 131072  
SOLVENT CDCl3  
NS 16  
DS 4  
SWH 187500.000 Hz  
FIDRES 1.430511 Hz  
AQ 0.3495253 sec  
RG 197.27  
DW 2.667 usec  
DE 6.50 usec  
TE 297.7 K  
D1 1.00000000 sec  
TD0 1

----- CHANNEL f1 -----  
SFO1 470.5453180 MHz  
NUC1 19F  
P1 13.50 usec  
PLW1 40.00000000 W

F2 - Processing parameters  
SI 65536  
SF 470.5923770 MHz  
WDW EM  
SSB 0  
LB 0.30 Hz  
GB 0  
PC 1.00

PG-AK-9-97-1-19F

---73.79

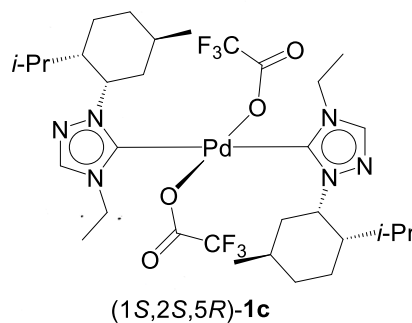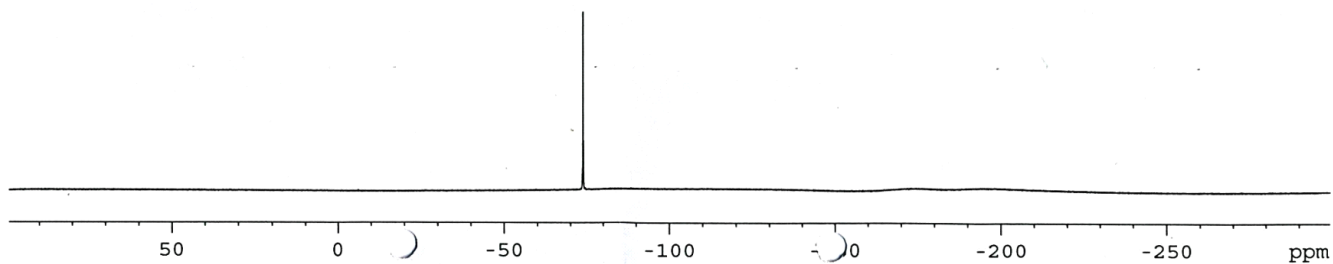

Figure S64. <sup>19</sup>F{<sup>1</sup>H} NMR spectrum of 1S,2S,5R-1c in CDCl<sub>3</sub>.

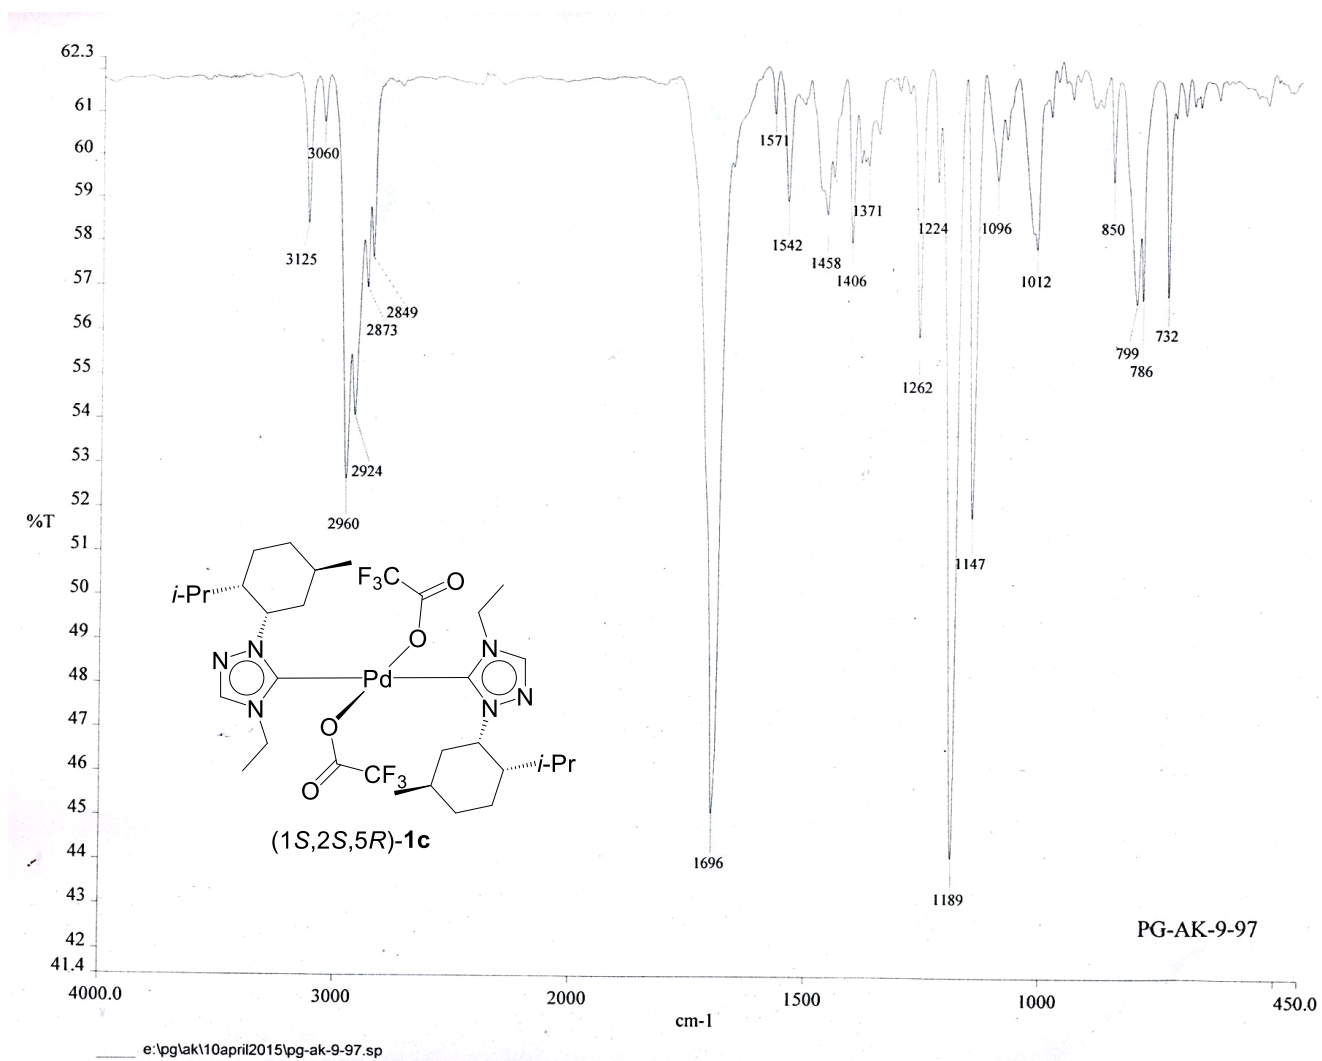

Figure S65. Infrared spectrum of 1S,2S,5R-1c in KBr.

DEPARTMENT OF CHEMISTRY, I.I.T.(B)

Analysis Info

Analysis Name D:\Data\FEB-2016\PG-AK-09-97.d  
 Method Tune\_pos\_NAICSI-1000a.m  
 Sample Name PG-AK-09-97  
 Comment C32H50N6O4PdF6

Acquisition Date 2/29/2016 9:01:53 PM

Operator PG APP IN  
 Instrument maXis impact 282001.00081

Acquisition Parameter

|             |          |                       |            |                  |           |
|-------------|----------|-----------------------|------------|------------------|-----------|
| Source Type | ESI      | Ion Polarity          | Positive   | Set Nebulizer    | 0.3 Bar   |
| Focus       | Active   | Set Capillary         | 3700 V     | Set Dry Heater   | 180 °C    |
| Scan Begin  | 50 m/z   | Set End Plate Offset  | -500 V     | Set Dry Gas      | 4.0 l/min |
| Scan End    | 1000 m/z | Set Collision Cell RF | 1200.0 Vpp | Set Divert Valve | Source    |

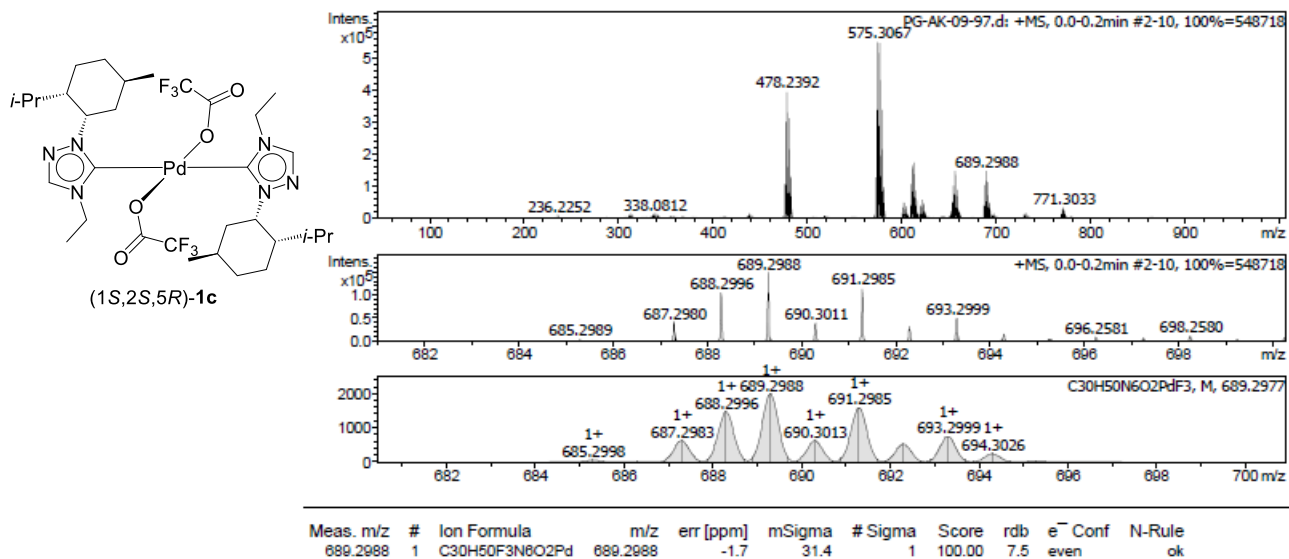

Figure S66. High Resolution Mass Spectrometry (HRMS) data of 1S,2S,5R-1c.

## Eager 300 Report

Page: 1    Sample: PG-AK-9-97-1 (PG-AK-9-97-1)

Method Name : PGCP11052015  
 Method File : D:\CHNS-2015\PGCP11052015.mth  
 Chromatogram : PG-AK-9-97-1  
 Operator ID : CHANDNI  
 Analysed : 05/11/2015 11:48  
 Sample ID : PG-AK-9-97-1 (# 6)  
 Analysis Type : UnkNown (Area)

Company Name : C.E. Instruments  
 Printed : 5/13/2015 19:41  
 Instrument N. : Instrument #1  
 Sample weight : .815

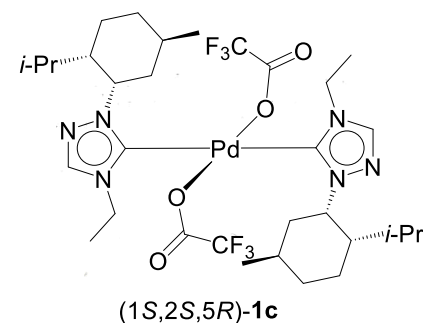

Calib. method : using 'K Factors'

!!! Warning missing one or more peaks.

| Element Name | %       | Ret.Time | Area    | BC | Area ratio | K factor    |
|--------------|---------|----------|---------|----|------------|-------------|
| Nitrogen     | 10.7128 | 42       | 103089  | RS | 10.013580  | .118073E+07 |
| Carbon       | 48.3356 | 65       | 1032285 | RS | 1.000000   | .262045E+07 |
| Hydrogen     | 5.9624  | 175      | 340944  | RS | 3.027726   | .667788E+07 |
| Totals       | 65.0108 |          | 1476318 |    |            |             |

Figure S67. Elemental analysis data of 1S,2S,5R-1c.

CENTRAL FACILITY LAB CHEMISTRY DEPT. IIT MUMBAI

Monday, 01-DEC-2014

This sample was measured on an Autopol IV, Serial #82083  
Manufactured by Rudolph Research Analytical, Hackettstown, NJ, USA.

Lot ID : pg

Set Temperature : 25.0

Time Delay : Disabled

Temperature Correction : OFF

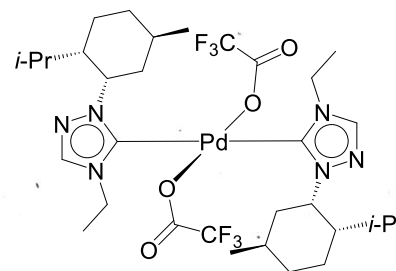

(1S,2S,5R)-1c

| <u>n</u>    | <u>Average</u>   | <u>Std.Dev.</u> | <u>Maximum</u> | <u>Minimum</u> |                |            |              |              |              |  |
|-------------|------------------|-----------------|----------------|----------------|----------------|------------|--------------|--------------|--------------|--|
| 5           | 47.857           | 0.0671          | 47.902         | 47.752         |                |            |              |              |              |  |
| <u>S.No</u> | <u>Sample ID</u> | <u>Time</u>     | <u>Result</u>  | <u>Scale</u>   | <u>OR °Arc</u> | <u>WLG</u> | <u>Lg.mm</u> | <u>Conc.</u> | <u>Temp.</u> |  |
| 1           | pg-ak-9-111      | 11:54:32        | 47.752         | SR             | 0.478          | 589        | 100          | 1            | 25.1         |  |
| 2           | pg-ak-9-111      | 11:54:39        | 47.827         | SR             | 0.478          | 589        | 100          | 1            | 25.1         |  |
| 3           | pg-ak-9-111      | 11:54:46        | 47.902         | SR             | 0.479          | 589        | 100          | 1            | 25.0         |  |
| 4           | pg-ak-9-111      | 11:54:53        | 47.902         | SR             | 0.479          | 589        | 100          | 1            | 25.0         |  |
| 5           | pg-ak-9-111      | 11:54:59        | 47.902         | SR             | 0.479          | 589        | 100          | 1            | 25.0         |  |

**Figure S68.** Specific rotation of 1S,2S,5R-1c in CHCl<sub>3</sub>.

Current Data Parameters  
NAME PG-AK-11-225-1-1H  
EXPNO 4  
PROCNO 1

PG-AK-11-225-1-1H

F2 - Acquisition Parameters  
Date\_ 20151026  
Time\_ 0.14  
INSTRUM spect  
PROBHD 5 mm PABBO BB/  
PULPROG zg30  
TD 65536  
SOLVENT CDCl3  
NS 50  
DS 0  
SWH 10000.000 Hz  
FIDRES 0.152588 Hz  
AQ 3.2767999 sec  
RG 80.35  
DW 50.000 usec  
DE 6.50 usec  
TE 295.5 K  
DL 1.00000000 sec  
TDO 1

==== CHANNEL f1 =====  
SFO1 500.1330885 MHz  
NUC1 1H  
P1 13.00 usec  
PLW1 13.00000000 W

F2 - Processing parameters  
SI 65536  
SF 500.1300127 MHz  
WDW EM  
SSB 0  
LB 0.30 Hz  
GB 0  
PC 1.00

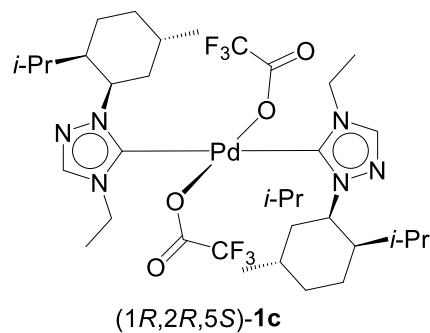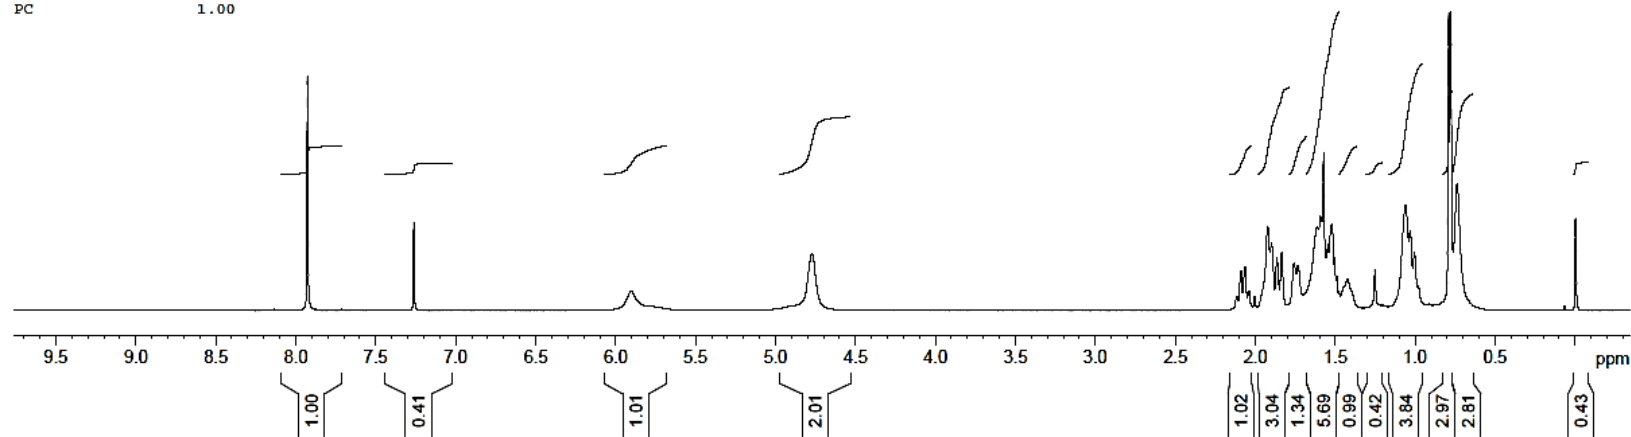

Figure S69. <sup>1</sup>H NMR spectrum of (1R,2R,5S)-1c in CDCl<sub>3</sub>.

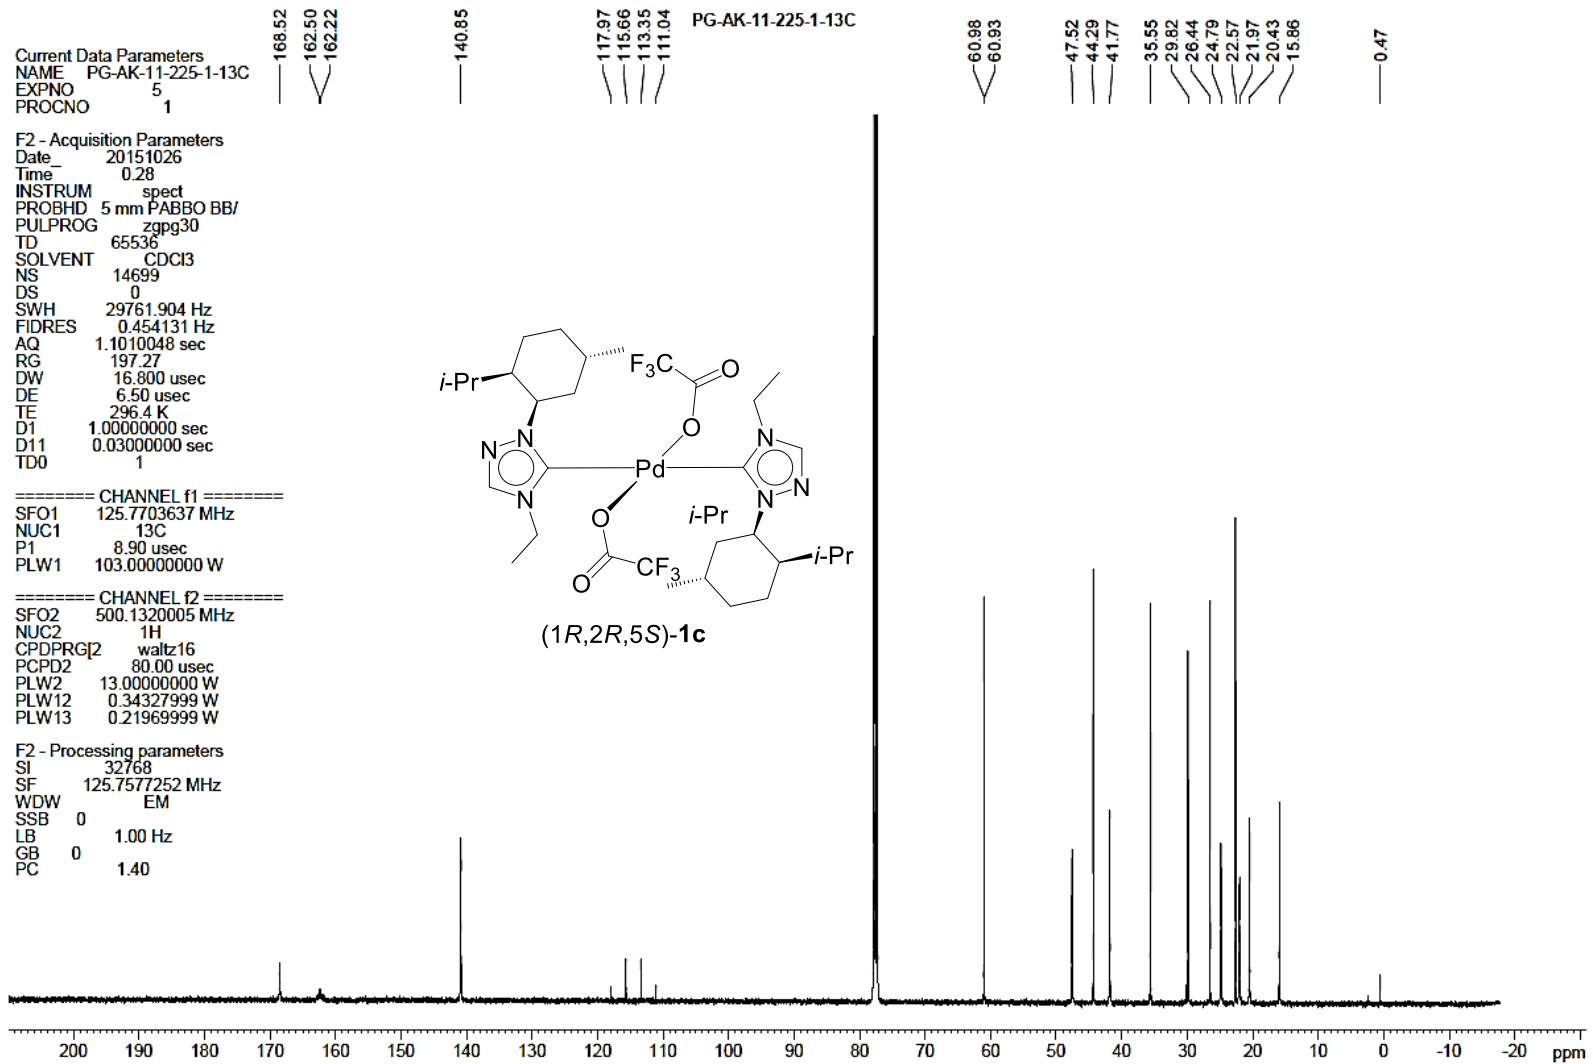

Figure S70.  $^{13}\text{C}\{^1\text{H}\}$  NMR spectrum of (1*R*,2*R*,5*S*)-**1c** in  $\text{CDCl}_3$ .

PG-AK-11-225-1-19F

-73.88

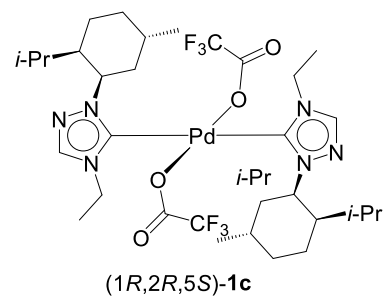

Current Data Parameters  
NAME PG-AK-11-225-1-19F  
EXPNO 4  
PROCNO 1

F2 - Acquisition Parameters  
Date\_ 20151026  
Time\_ 21.37  
INSTRUM spect  
PROBHD 5 mm PABBO BB/  
PULPROG zgfglqn  
TD 131072  
SOLVENT CDCl3  
NS 48  
DS 4  
SWH 113636.367 Hz  
FIDRES 0.866977 Hz  
AQ 0.5767168 sec  
RG 197.27  
DW 4.400 usec  
DE 6.50 usec  
TE 295.5 K  
D1 1.00000000 sec  
TD0 1

==== CHANNEL f1 =====  
SFO1 470.5453180 MHz  
NUC1 19F  
P1 13.50 usec  
PLW1 40.00000000 W

F2 - Processing parameters  
SI 65536  
SF 470.5923770 MHz  
WDW EM  
SSB 0  
LB 0.30 Hz  
GB 0  
PC 1.00

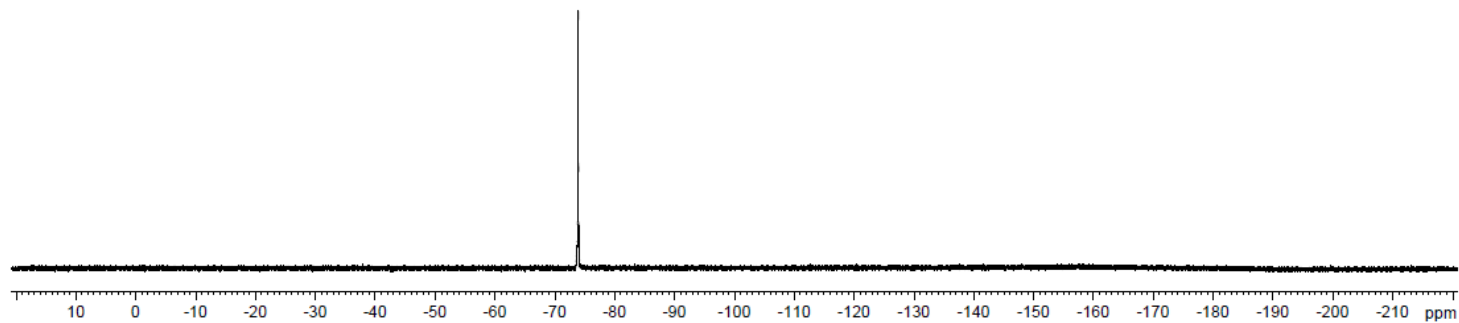

Figure S71. <sup>19</sup>F{<sup>1</sup>H} NMR spectrum of (1R,2R,5S)-1c in CDCl<sub>3</sub>.



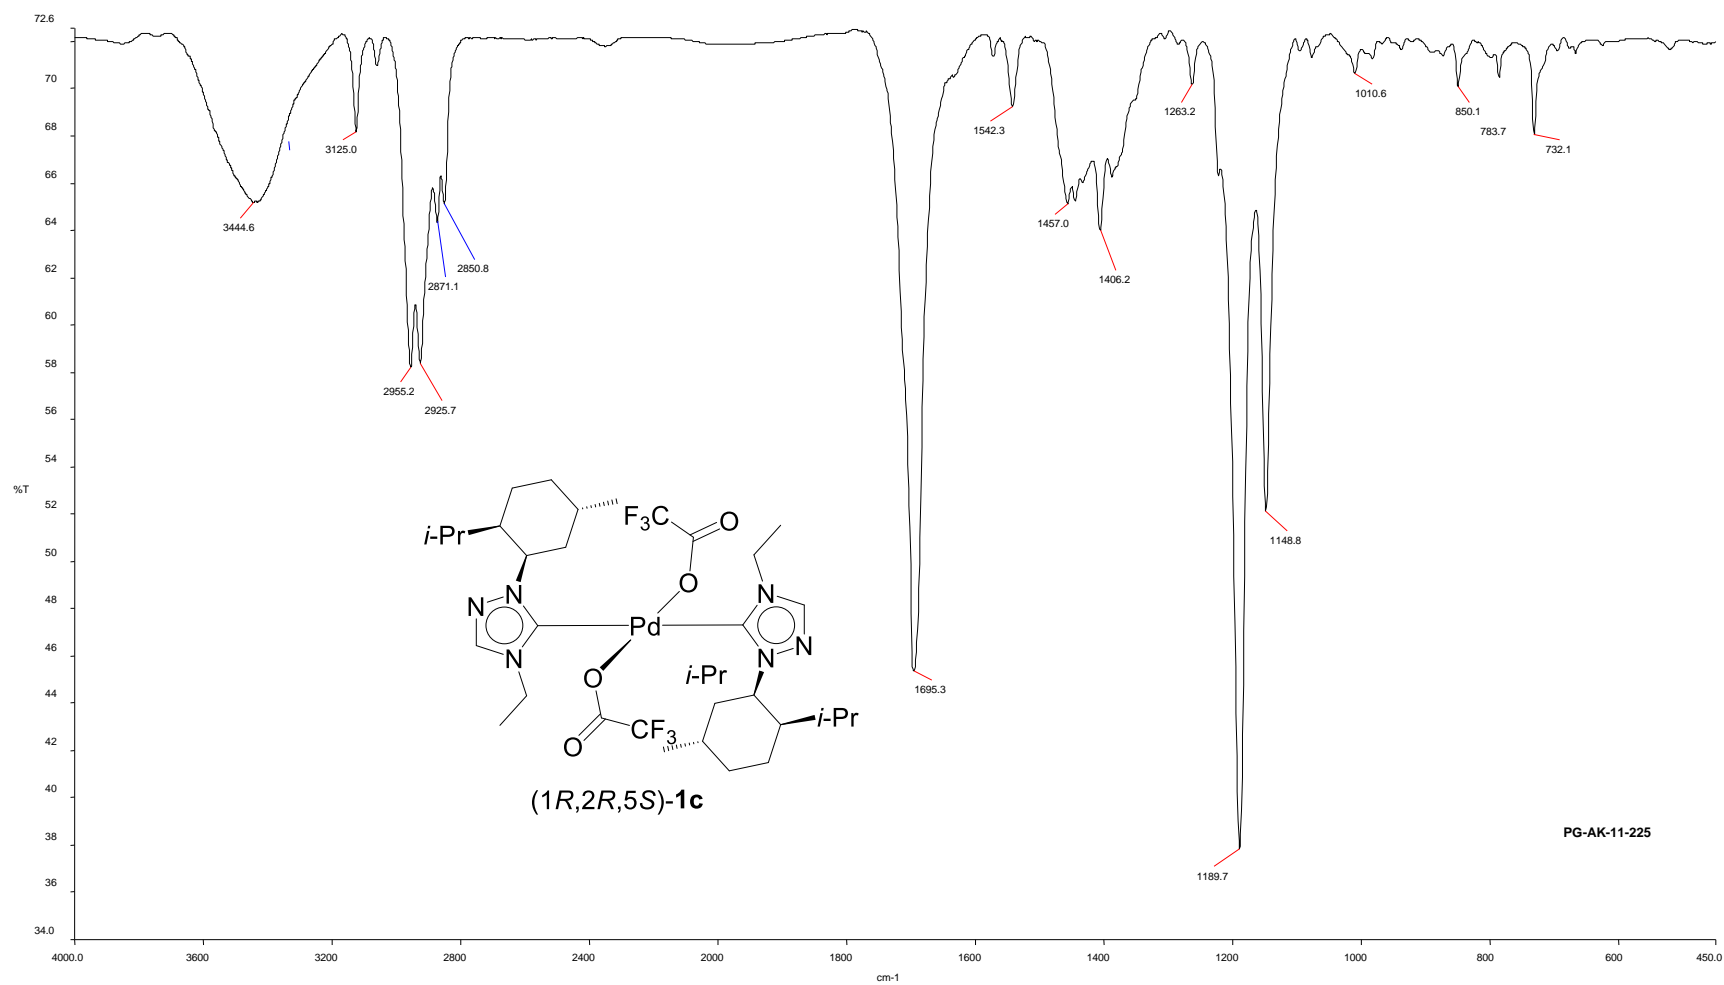

**Figure S72.** Infrared spectrum of 1*R*,2*R*,5*S*-1c in KBr.

DEPARTMENT OF CHEMISTRY, I.I.T.(B)

**Analysis Info**

Analysis Name D:\Data\FEB-2016\PG-AK-11-225.d  
 Method Tune\_pos\_NAICSI-1000a.m  
 Sample Name PG-AK-11-225  
 Comment C32H50N6O4PdF6

Acquisition Date 2/29/2016 9:03:39 PM

Operator PG APP IN  
 Instrument maXis impact 282001.00081

**Acquisition Parameter**

|             |          |                       |            |                  |           |
|-------------|----------|-----------------------|------------|------------------|-----------|
| Source Type | ESI      | Ion Polarity          | Positive   | Set Nebulizer    | 0.3 Bar   |
| Focus       | Active   | Set Capillary         | 3700 V     | Set Dry Heater   | 180 °C    |
| Scan Begin  | 50 m/z   | Set End Plate Offset  | -500 V     | Set Dry Gas      | 4.0 l/min |
| Scan End    | 1000 m/z | Set Collision Cell RF | 1200.0 Vpp | Set Divert Valve | Source    |

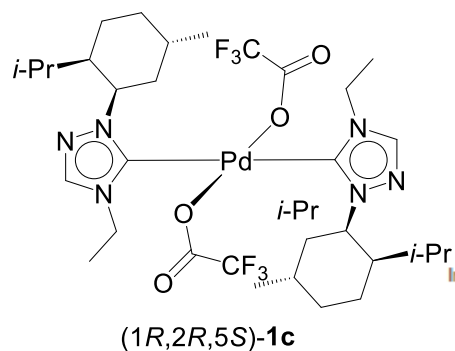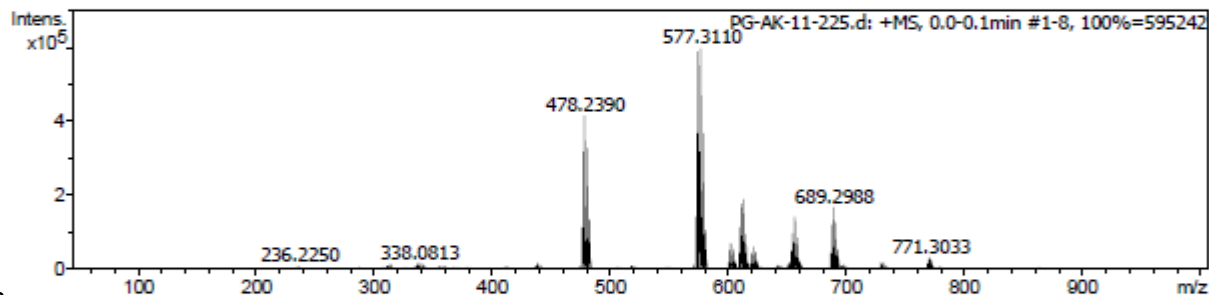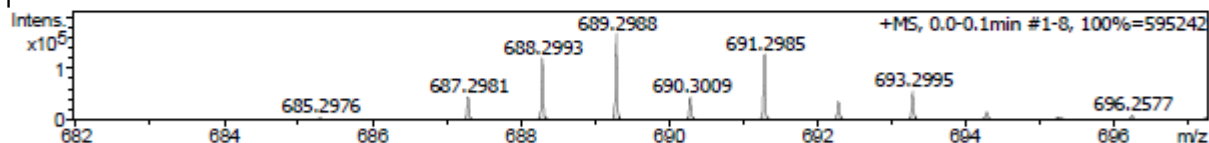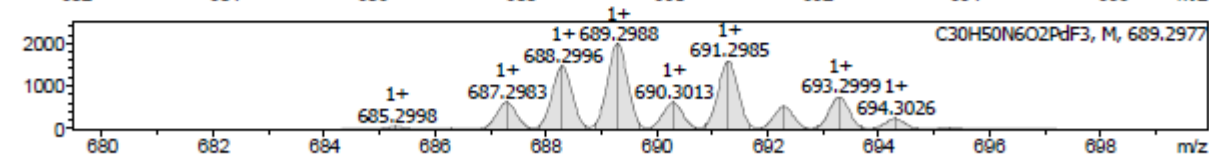

| Meas. m/z | # | Ion Formula    | m/z      | err [ppm] | mSigma | # Sigma | Score  | rdb | e <sup>-</sup> Conf | N-Rule |
|-----------|---|----------------|----------|-----------|--------|---------|--------|-----|---------------------|--------|
| 689.2988  | 1 | C30H50F3N6O2Pd | 689.2988 | -1.6      | 34.6   | 1       | 100.00 | 7.5 | even                | ok     |

**Figure S73.** High Resolution Mass Spectrometry (HRMS) data of 1R,2R,5S-1c.

# Eager 300 Report

Page: 1 Sample: PG-AK-11-225-1 (PG-AK-11-225-1)

Method Name : PGCP13102015  
 Method File : D:\CHNS-2015\PGCP13102015.mth  
 Chromatogram : PG-AK-11-225-1  
 Operator ID : CHANDNI  
 Analysed : 10/13/2015 14:08  
 Sample ID : PG-AK-11-225-1 (# 18)  
 Analysis Type : UnkNown (Area)

Company Name : C.E. Instruments  
 Printed : 10/13/2015 18:36  
 Instrument N. : Instrument #1  
 Sample weight : .644

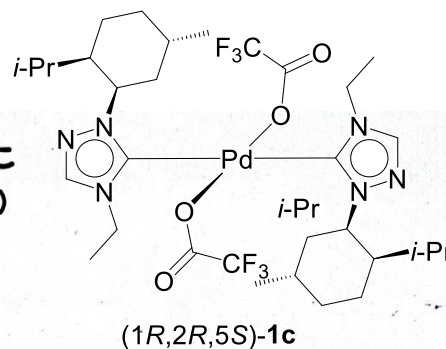

Calib. method : using 'K Factors'

!!! Warning missing one or more peaks.

| Element Name | %       | Ret.Time | Area    | BC | Area ratio | K factor    |
|--------------|---------|----------|---------|----|------------|-------------|
| Nitrogen     | 10.6417 | 41       | 74217   | RS | 10.955020  | .108295E+07 |
| Carbon       | 48.2606 | 64       | 813049  | RS | 1.000000   | .260680E+07 |
| Hydrogen     | 5.7098  | 178      | 259480  | RS | 3.133376   | .665180E+07 |
| Totals       | 64.6121 |          | 1146746 |    |            |             |

Figure S74. Elemental analysis data of (1R,2R,5S)-1c.

CENTRAL FACILITY LAB CHEMISTRY DEPT. IIT MUMBAI

Tuesday, 27-OCT-2015

This sample was measured on an Autopol IV, Serial #82083  
 Manufactured by Rudolph Research Analytical, Hackettstown, NJ, USA.

Lot ID : pg

Set Temperature : 25.0  
 Time Delay : Disabled  
 Temperature Correction : OFF

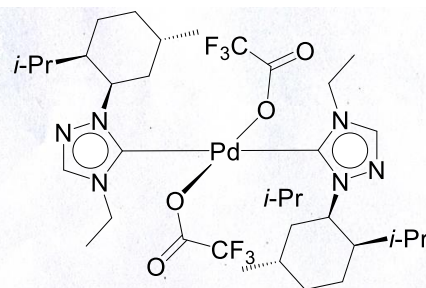

(1R,2R,5S)-1c  
 Maximum

| n | Average | Std.Dev. | Maximum | Minimum |
|---|---------|----------|---------|---------|
| 5 | -47.974 | 0.1665   | -47.792 | -48.096 |

  

| S.No | Sample ID      | Time     | Result  | Scale | OR °Arc | WLG | Lg.mm | Conc. | Temp. |
|------|----------------|----------|---------|-------|---------|-----|-------|-------|-------|
| 1    | pg-ak-11-225-1 | 17:20:17 | -47.792 | SR    | -0.239  | 589 | 50.00 | 1.000 | 25.1  |
| 2    | pg-ak-11-225-1 | 17:20:24 | -47.792 | SR    | -0.239  | 589 | 50.00 | 1.000 | 25.1  |
| 3    | pg-ak-11-225-1 | 17:20:31 | -48.096 | SR    | -0.240  | 589 | 50.00 | 1.000 | 25.1  |
| 4    | pg-ak-11-225-1 | 17:20:38 | -48.096 | SR    | -0.240  | 589 | 50.00 | 1.000 | 25.1  |
| 5    | pg-ak-11-225-1 | 17:20:45 | -48.096 | SR    | -0.240  | 589 | 50.00 | 1.000 | 25.1  |

Figure S75. Specific rotation of (1R,2R,5S)-1c in CHCl<sub>3</sub>.

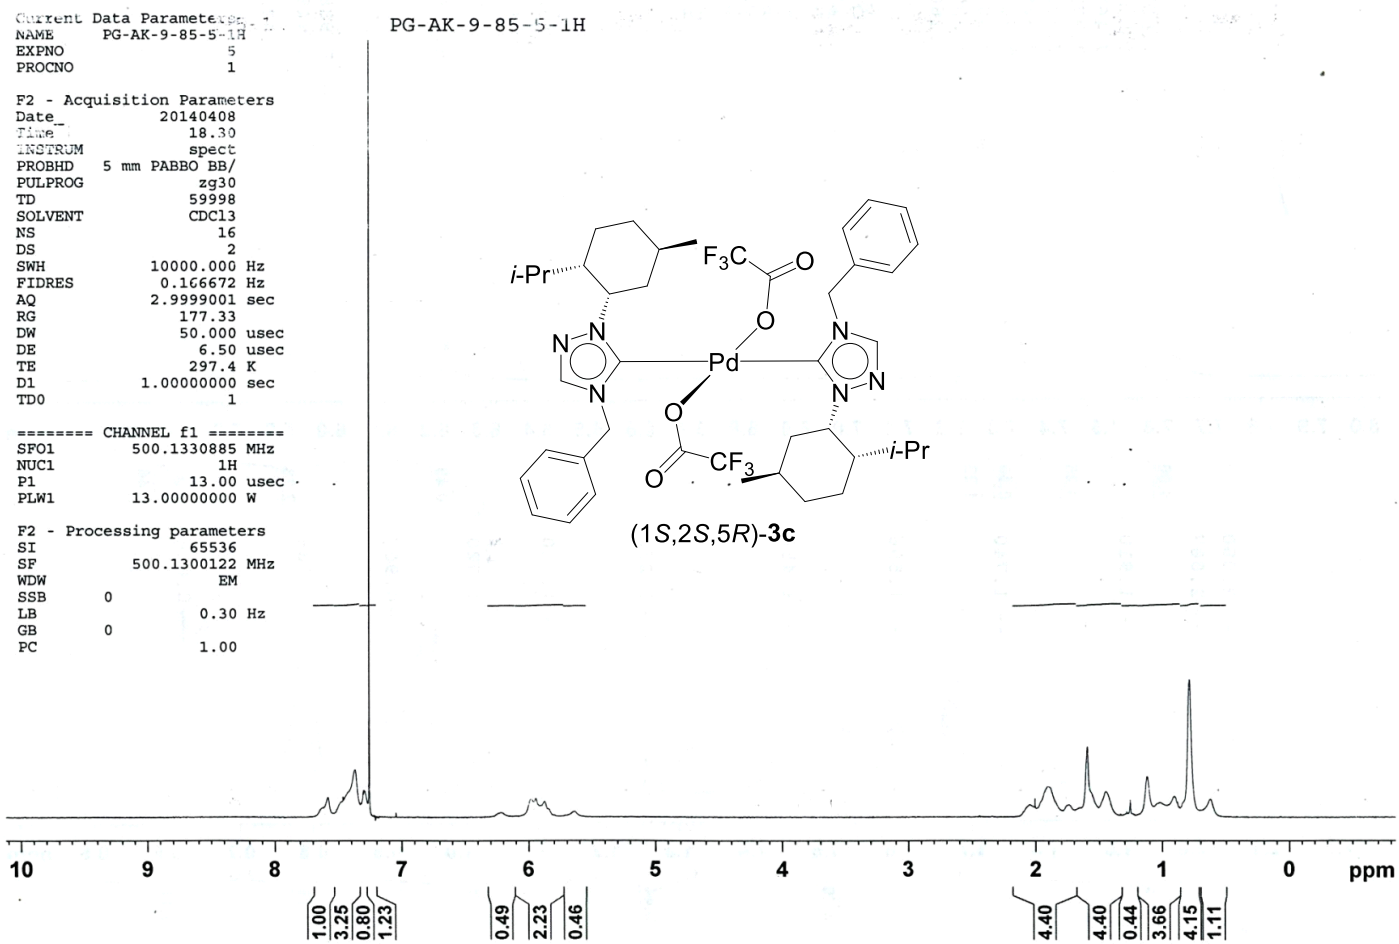

Figure S76.  $^1\text{H}$  NMR spectrum of 1*S*,2*S*,5*R*-**3c** in  $\text{CDCl}_3$ .

PG-AK-9-85-3-13C

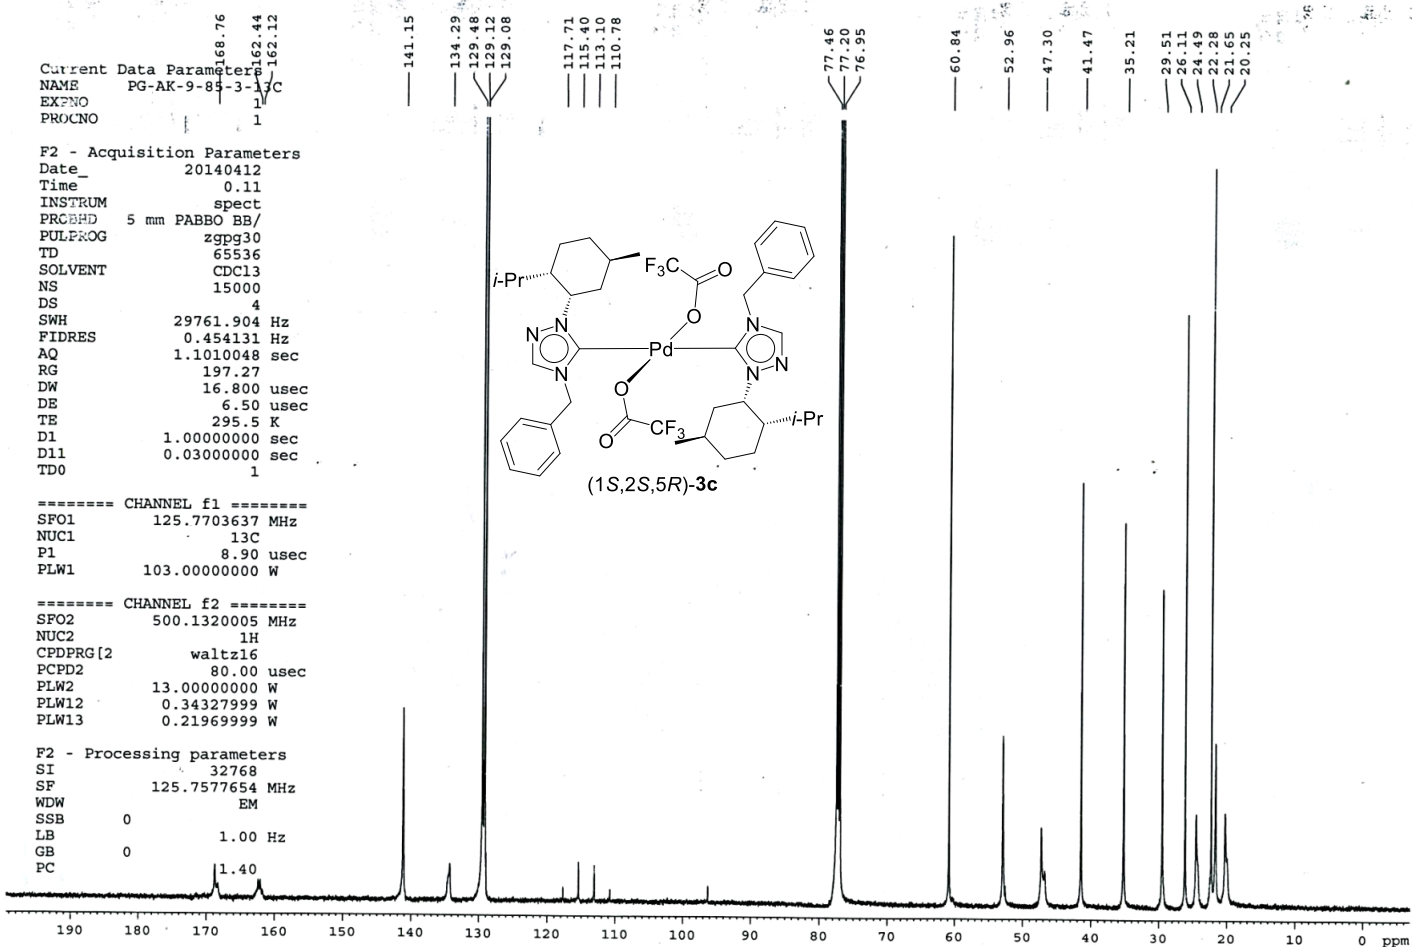

Figure S77.  $^{13}\text{C}\{^1\text{H}\}$  NMR spectrum of 1S,2S,5R-3c in  $\text{CDCl}_3$ .

PG-AK-9-85-5-19F

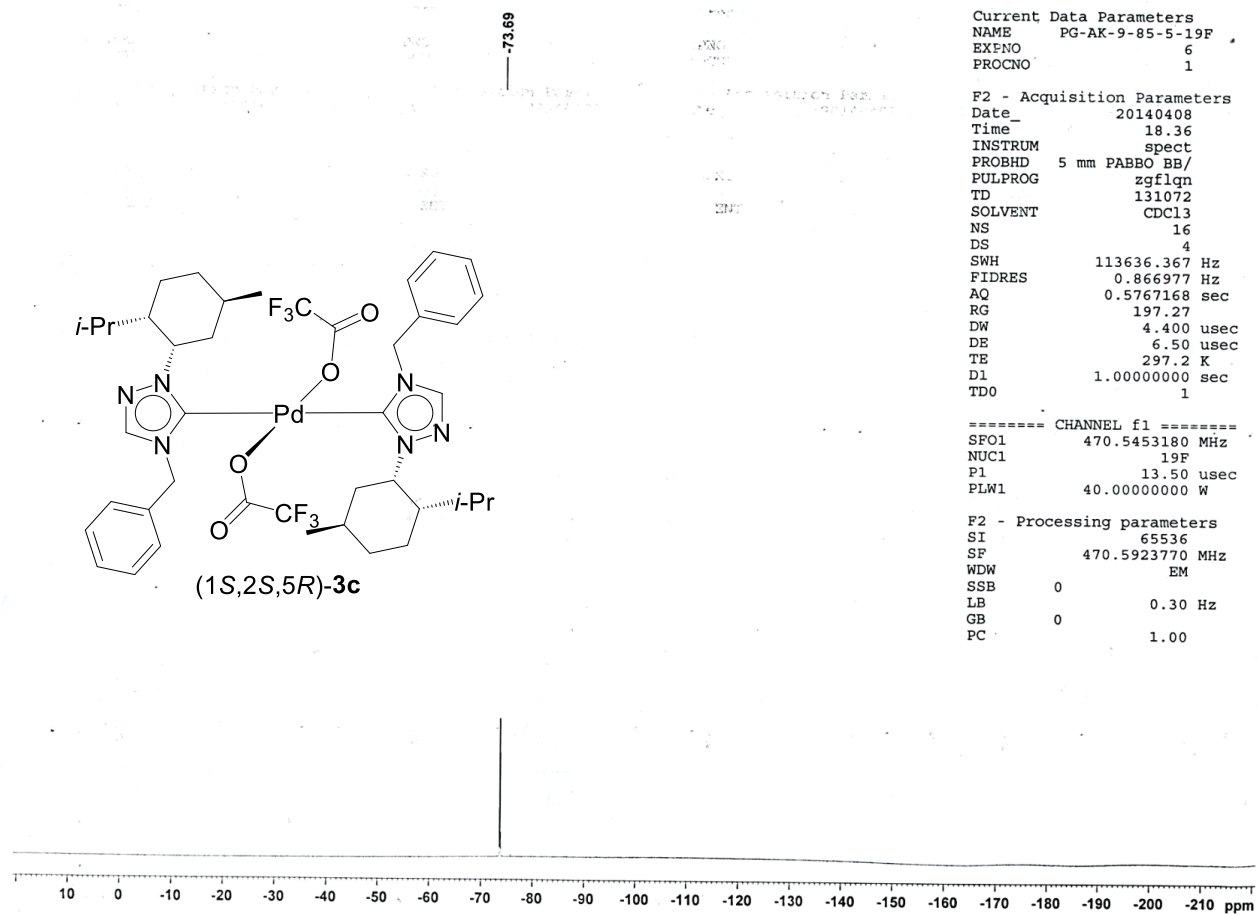

Figure S78.  $^{19}\text{F}\{^1\text{H}\}$  NMR spectrum of 1S,2S,5R-3c in  $\text{CDCl}_3$ .

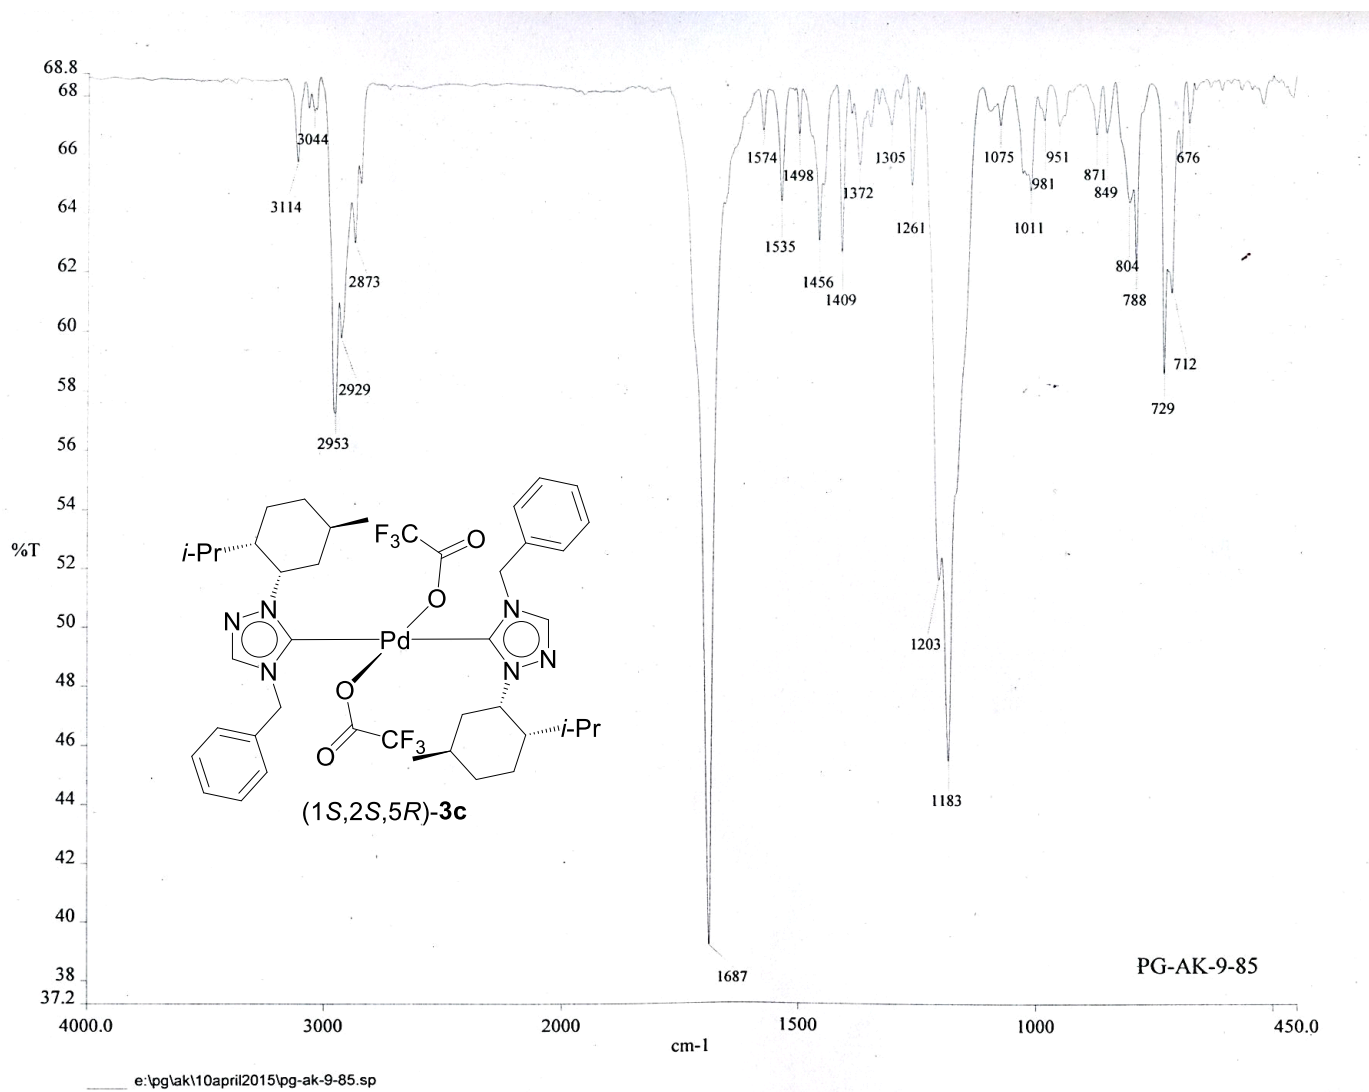

**Figure S79.** Infrared spectrum of 1*S*,2*S*,5*R*-3c in KBr.



DEPARTMENT OF CHEMISTRY, I.I.T.(B)

**Analysis Info** Acquisition Date 2/29/2016 9:17:02 PM  
 Analysis Name D:\Data\FEB-2016\PG-AK-09-85.d  
 Method Tune\_pos\_NAICSI-1000a.m Operator PG APP IN  
 Sample Name PG-AK-09-85 Instrument maXis impact 282001.00081  
 Comment C42H54N6O4PdF6

**Acquisition Parameter**  
 Source Type ESI Ion Polarity Positive Set Nebulizer 0.3 Bar  
 Focus Active Set Capillary 3700 V Set Dry Heater 180 °C  
 Scan Begin 50 m/z Set End Plate Offset -500 V Set Dry Gas 4.0 l/min  
 Scan End 1000 m/z Set Collision Cell RF 1200.0 Vpp Set Divert Valve Source

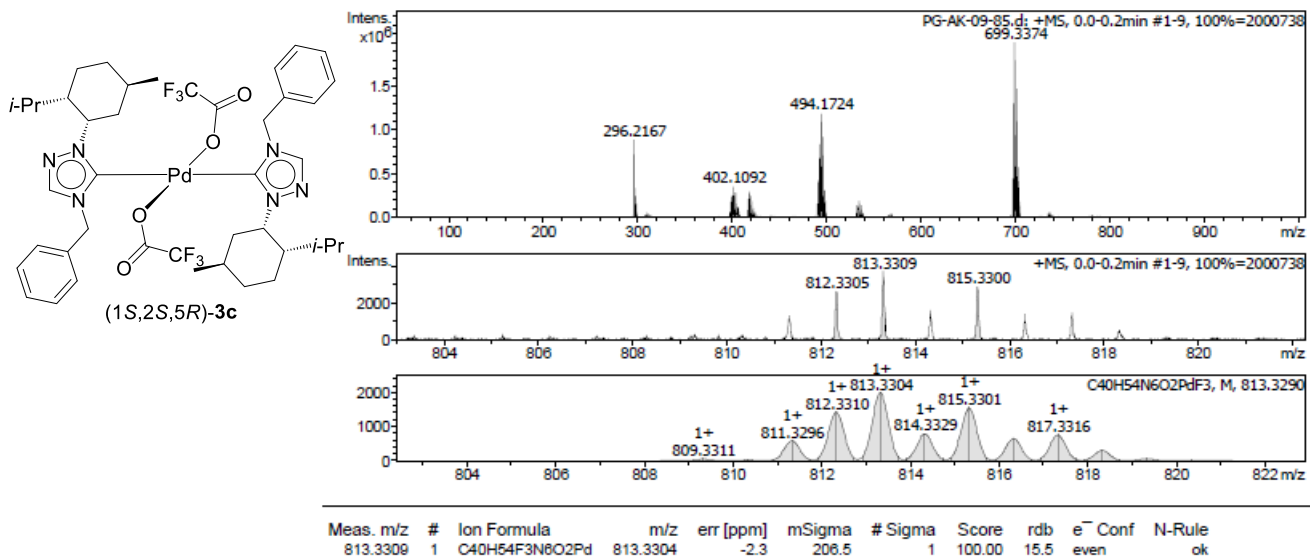

Figure S80. High Resolution Mass Spectrometry (HRMS) data of 1*S*,2*S*,5*R*-3*c*.

## Eager 300 Report

Page: 1    Sample: PG-AK-9-85 (PG-AK-9-85)

|                                          |                                 |
|------------------------------------------|---------------------------------|
| Method Name : SP-070414                  | Company Name : C.E. Instruments |
| Method File : D:\CHNS-2014\SP-070414.mth | Printed : 4/8/2014 01:06        |
| Chromatogram : PG-AK-9-85                | Instrument N. : Instrument #1   |
| Operator ID : MNRAO                      | Sample weight : .568            |
| Analysed : 04/07/2014 17:54              |                                 |
| Sample ID : PG-AK-9-85 (# 10)            |                                 |
| Analysis Type : UnkNown (Area)           |                                 |

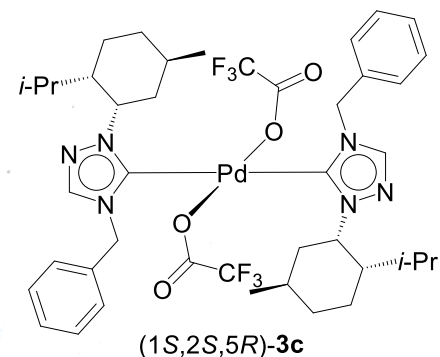

Calib. method : using 'K Factors'

!!! Warning missing one or more peaks.

| Element Name | %       | Ret.Time | Area    | BC | Area ratio | K factor    |
|--------------|---------|----------|---------|----|------------|-------------|
| Nitrogen     | 8.6513  | 40       | 76436   | FU | 10.880470  | .155549E+07 |
| Carbon       | 54.3093 | 64       | 831657  | FU | 1.000000   | .269601E+07 |
| Hydrogen     | 5.5081  | 175      | 251404  | RS | 3.308051   | .686517E+07 |
| Totals       | 68.4687 |          | 1159497 |    |            |             |

**Figure S81.** Elemental analysis data of 1S,2S,5R-3c.

CENTRAL FACILITY LAB CHEMISTRY DEPT. IIT MUMBAI

Monday, 01-DEC-2014

This sample was measured on an Autopol IV, Serial #82083  
 Manufactured by Rudolph Research Analytical, Hackettstown, NJ, USA.

Lot ID : pg

Set Temperature : 25.0  
 Time Delay : Disabled  
 Temperature Correction : OFF

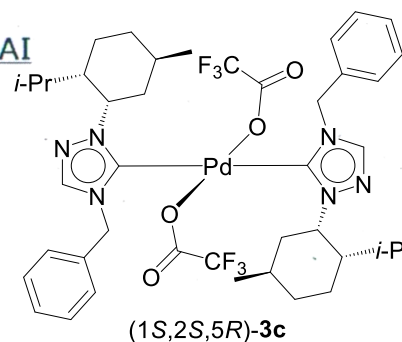

| n | Average | Std.Dev. | Maximum | Minimum |
|---|---------|----------|---------|---------|
| 5 | 40.237  | 1.2469   | 40.945  | 38.017  |

| S.No | Sample ID  | Time     | Result | Scale | OR °Arc | WLG | Lg.mm  | Conc. | Temp. |
|------|------------|----------|--------|-------|---------|-----|--------|-------|-------|
| 1    | pg-ak-9-85 | 12:04:50 | 38.017 | SR    | 0.380   | 589 | 100.00 | 1.000 | 25.1  |
| 2    | pg-ak-9-85 | 12:05:08 | 40.871 | SR    | 0.409   | 589 | 100.00 | 1.000 | 25.0  |
| 3    | pg-ak-9-85 | 12:05:15 | 40.718 | SR    | 0.407   | 589 | 100.00 | 1.000 | 25.0  |
| 4    | pg-ak-9-85 | 12:05:22 | 40.945 | SR    | 0.409   | 589 | 100.00 | 1.000 | 25.0  |
| 5    | pg-ak-9-85 | 12:05:29 | 40.632 | SR    | 0.406   | 589 | 100.00 | 1.000 | 25.0  |

Figure S82. Specific rotation of 1S,2S,5R-3c in CHCl<sub>3</sub>.

NAME PG-AK-11-226-1-1  
 EXPNO 6  
 PROCNO 1  
 Date\_ 20151030  
 Time 1.09  
 INSTRUM spect  
 PROBHD 5 mm SEI 1H/D-  
 PULPROG zg30  
 TD 54274  
 SOLVENT CDCl3  
 NS 16  
 DS 0  
 SWH 8223.685 Hz  
 FIDRES 0.151522 Hz  
 AQ 3.2999091 sec  
 RG 71.8  
 DW 60.800 usec  
 DE 6.50 usec  
 TE 294.0 K  
 D1 1.0000000 sec  
 TD0 1

PG-AK-11-226-1-1H

===== CHANNEL f1 =====  
 NUC1 1H  
 P1 14.75 usec  
 PL1 -1.00 dB  
 PL1W 10.56200695 W  
 SFO1 400.1324710 MHz  
 SI 32768  
 SF 400.1300095 MHz  
 WDW EM  
 SSB 0  
 LB 0.30 Hz  
 GB 0  
 PC 1.00

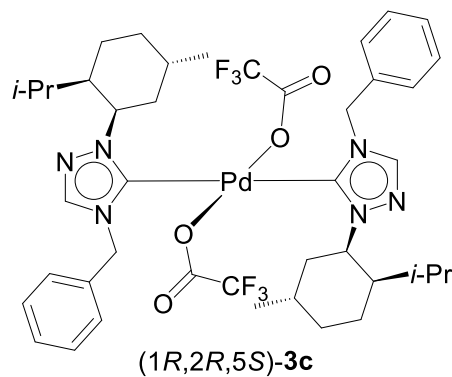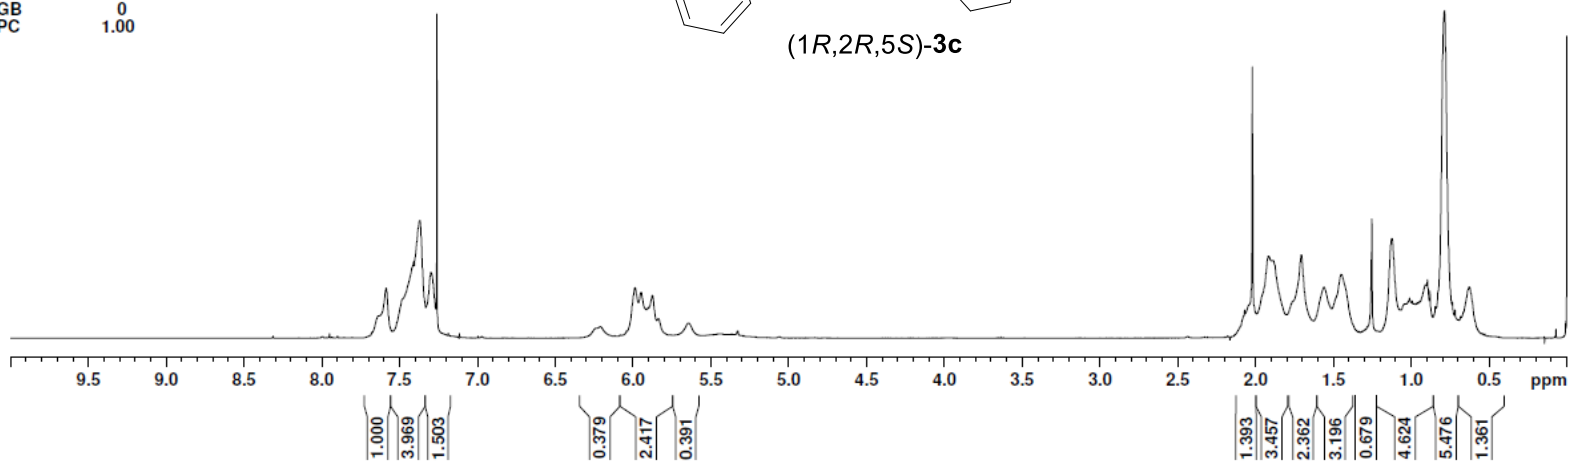

Figure S83.  $^1\text{H}$  NMR spectrum of (1R,2R,5S)-3c in  $\text{CDCl}_3$ .

NAME PG-AK-11-226-1-13C  
 EXPNO 7  
 PROCNO 1  
 Date\_ 20151030  
 Time 1.20  
 INSTRUM spect  
 PROBHD 5 mm SEI 1H/D-  
 PULPROG zgpg30  
 TD 65536  
 SOLVENT CDCl3  
 NS 12765  
 DS 4  
 SWH 26041.666 Hz  
 FIDRES 0.397364 Hz  
 AQ 1.2583412 sec  
 RG 32  
 DW 19.200 usec  
 DE 6.50 usec  
 TE 295.2 K  
 D1 1.00000000 sec  
 D11 0.03000000 sec  
 TDO 1

PG-AK-11-226-1-13C

----- CHANNEL f1 -----  
 NUC1 13C  
 P1 8.50 usec  
 PL1 -2.00 dB  
 PL1W 56.53121948 W  
 SFO1 100.6238364 MHz  
 ----- CHANNEL f2 -----  
 CPDPRG2 waltz16  
 NUC2 1H  
 PCPD2 80.00 usec  
 PL2 -1.00 dB  
 PL12 13.69 dB  
 PL13 14.50 dB  
 PL2W 10.56200695 W  
 PL12W 0.35871249 W  
 PL13W 0.29767781 W  
 SFO2 400.1316005 MHz  
 SI 32768  
 SF 100.6127495 MHz  
 WDW EM  
 SSB 0  
 LB 1.00 Hz  
 GB 0  
 PC 1.40

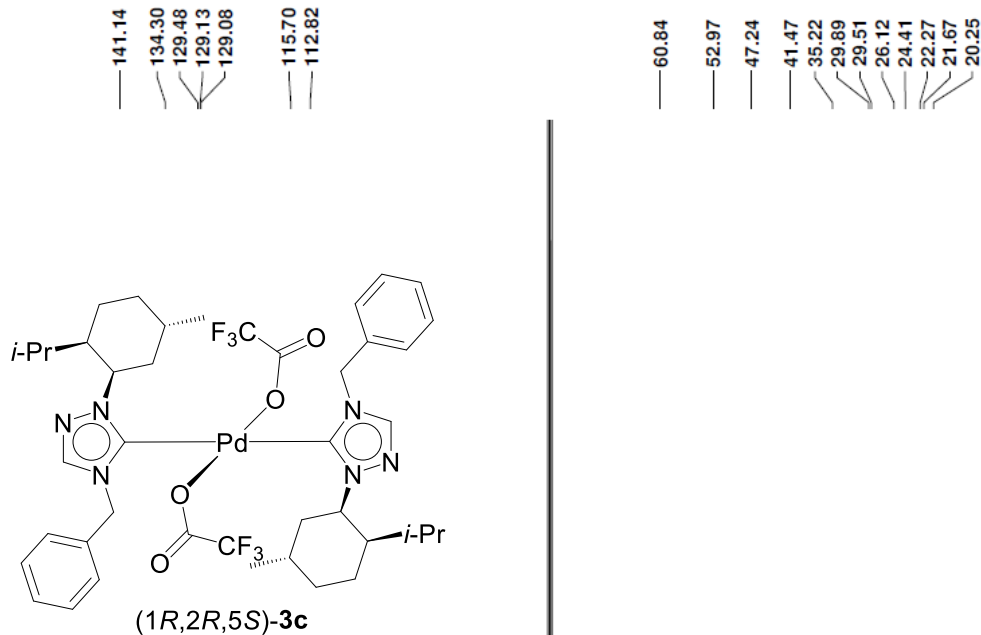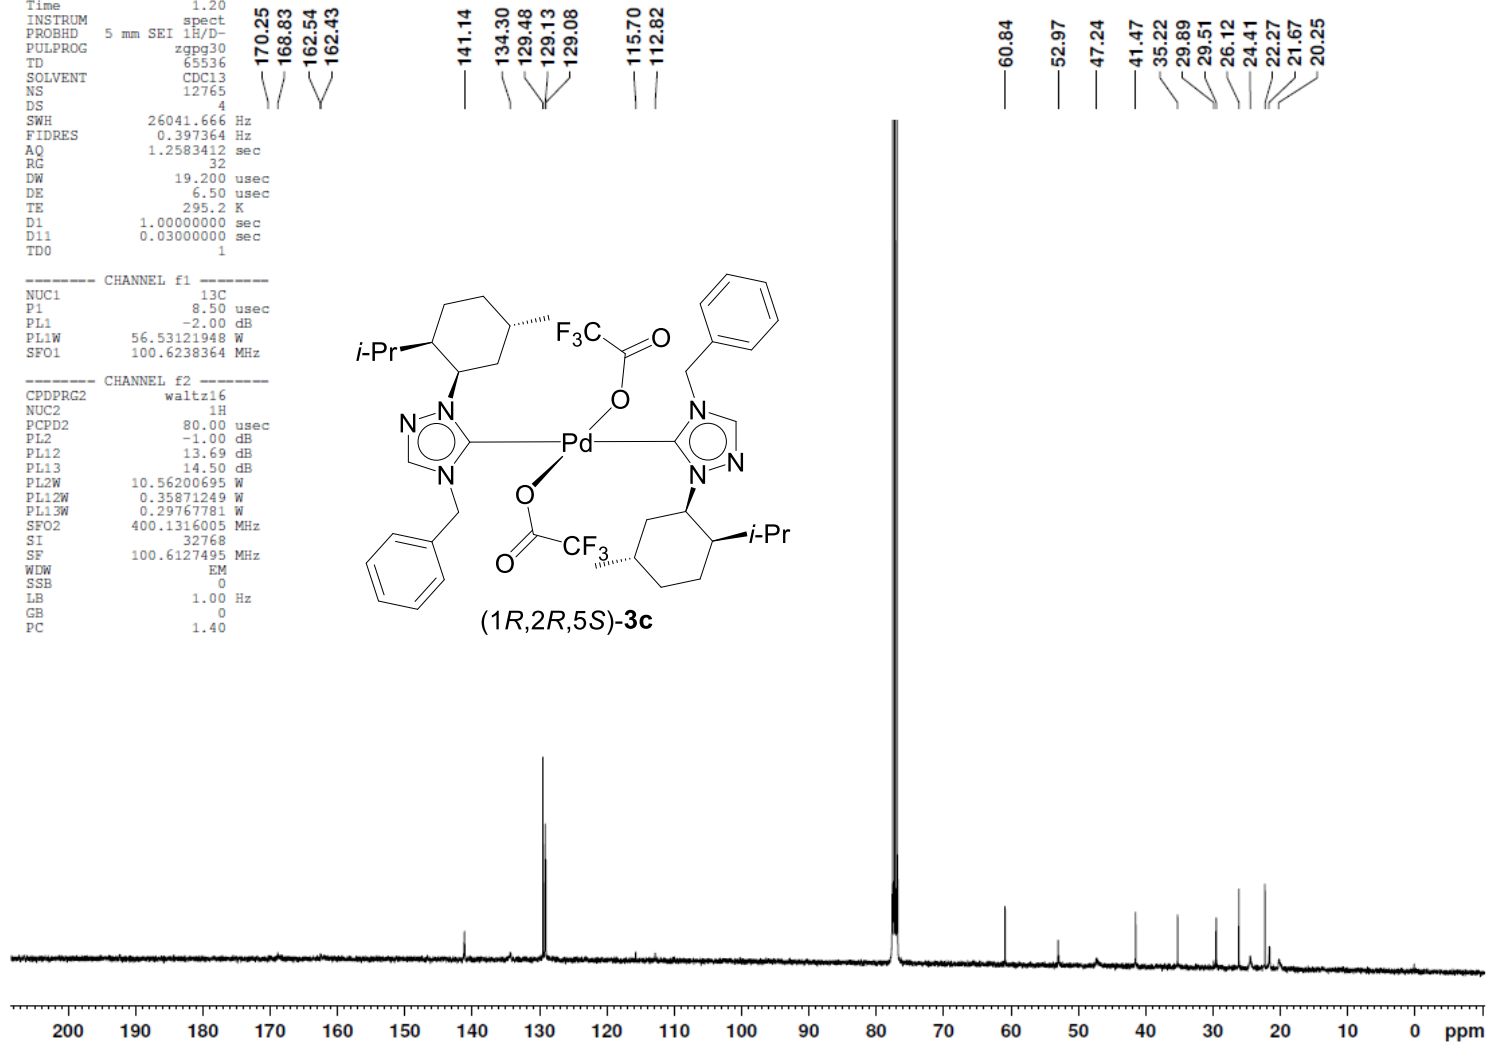

Figure S84.  $^{13}\text{C}\{^1\text{H}\}$  NMR spectrum of (1R,2R,5S)-3c in  $\text{CDCl}_3$ .

PG-AK-11-226-1-19F

Current Data Parameters  
NAME PG-AK-11-226-1-19F  
EXPNO 15  
PROCNO 1

F2 - Acquisition Parameters  
Date 20151101  
Time 0.04  
INSTRUM spect  
PROBHD 5 mm PABBO BB/  
PULPROG zgfg1qn  
TD 131072  
SOLVENT CDCl3  
NS 102  
DS 4  
SWH 113636.367 Hz  
FIDRES 0.866977 Hz  
AQ 0.5767168 sec  
RG 197.27  
DW 4.400 usec  
DE 6.50 usec  
TE 297.6 K  
D1 1.00000000 sec  
TD0 1

----- CHANNEL f1 -----  
SFO1 470.5453180 MHz  
NUC1 19F  
P1 13.50 usec  
PLW1 40.00000000 W

F2 - Processing parameters  
SI 65536  
SF 470.5923770 MHz  
WDW EM  
SSB 0  
LB 0.30 Hz  
GB 0  
PC 1.00

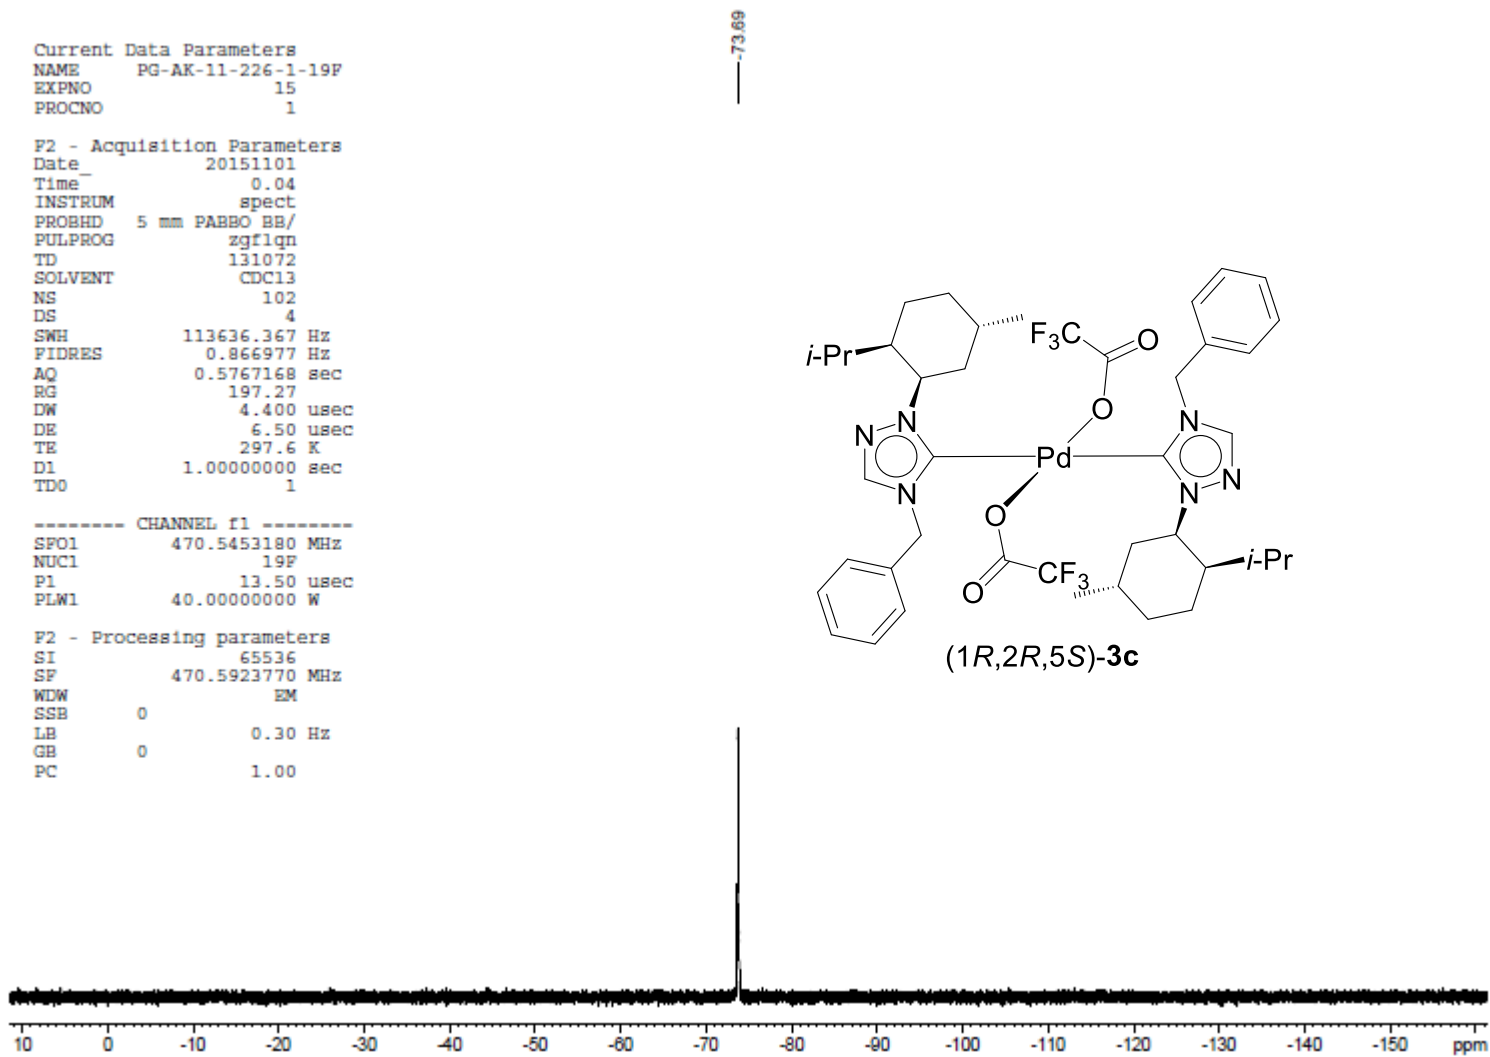

Figure S85.  $^{19}\text{F}\{^1\text{H}\}$  NMR spectrum of (1R,2R,5S)-3c in  $\text{CDCl}_3$ .

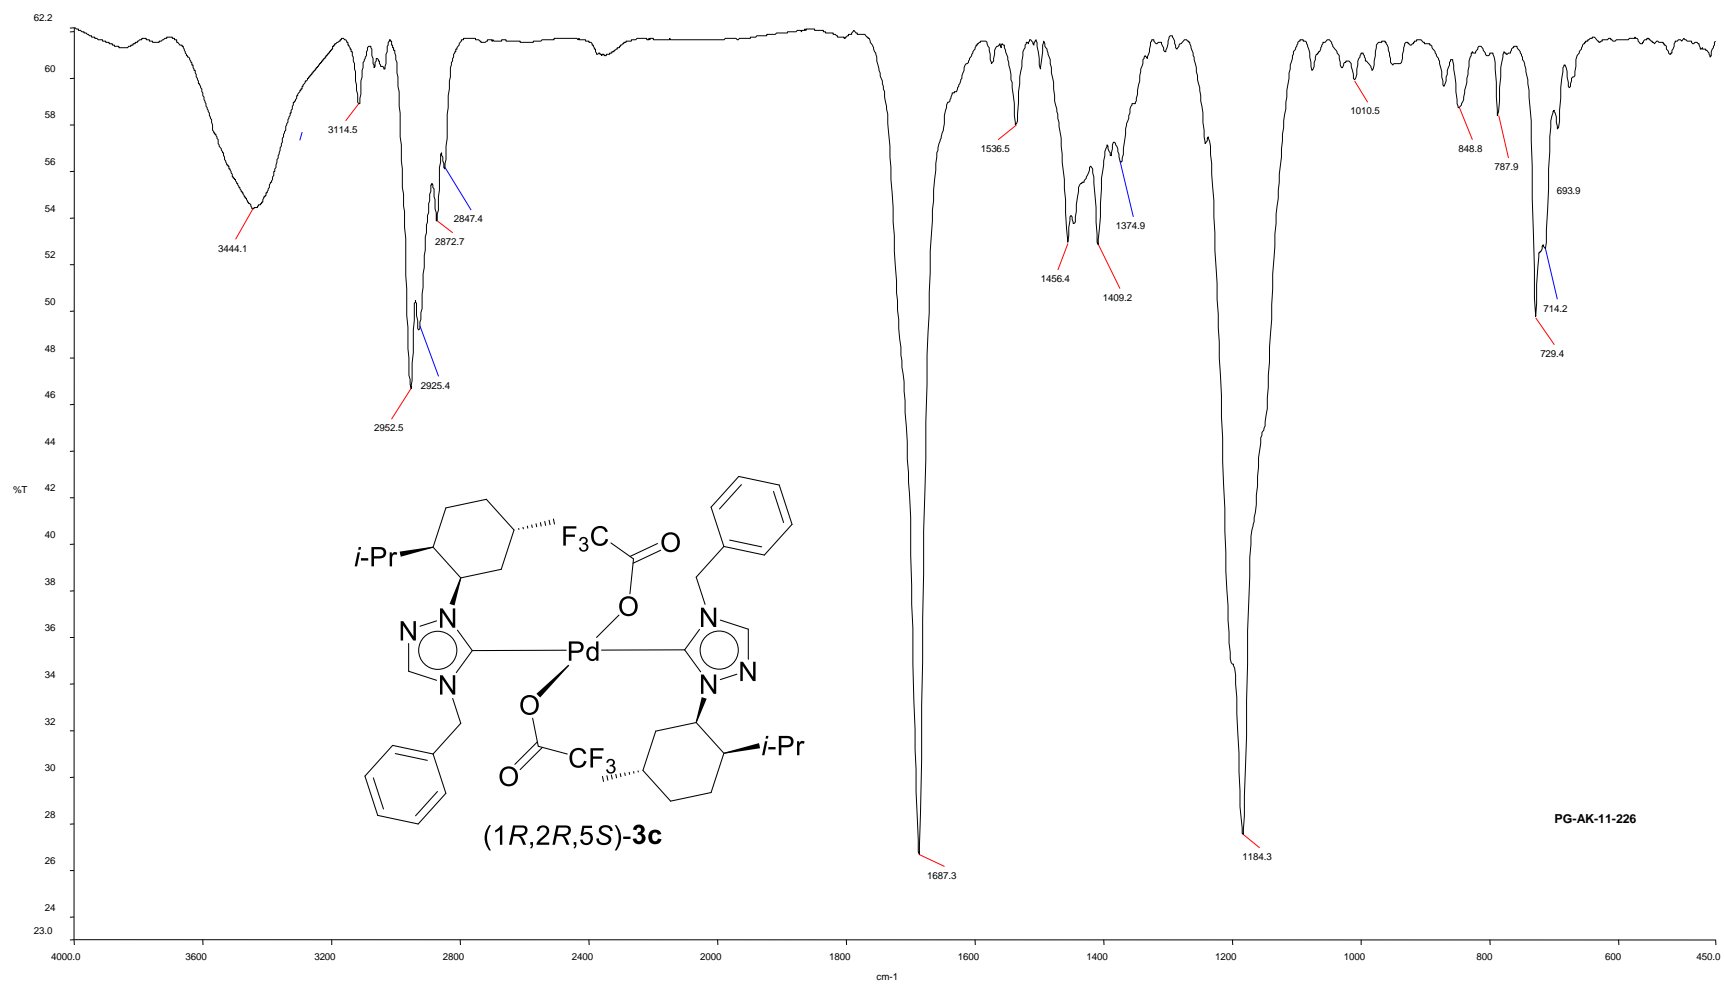

**Figure S86.** Infrared spectrum of 1*R*,2*R*,5*S*-3c in KBr.

DEPARTMENT OF CHEMISTRY, I.I.T.(B)

**Analysis Info**

Analysis Name D:\Data\FEB-2016\PG-AK-11-226.d  
 Method Tune\_pos\_NAICSI-1000a.m  
 Sample Name PG-AK-11-226  
 Comment C42H54N6O4PdF6

Acquisition Date 2/29/2016 9:20:17 PM

Operator PG APP IN  
 Instrument maXis impact 282001.00081

**Acquisition Parameter**

|             |          |                       |            |                  |           |
|-------------|----------|-----------------------|------------|------------------|-----------|
| Source Type | ESI      | Ion Polarity          | Positive   | Set Nebulizer    | 0.3 Bar   |
| Focus       | Active   | Set Capillary         | 3700 V     | Set Dry Heater   | 180 °C    |
| Scan Begin  | 50 m/z   | Set End Plate Offset  | -500 V     | Set Dry Gas      | 4.0 l/min |
| Scan End    | 1000 m/z | Set Collision Cell RF | 1200.0 Vpp | Set Divert Valve | Source    |

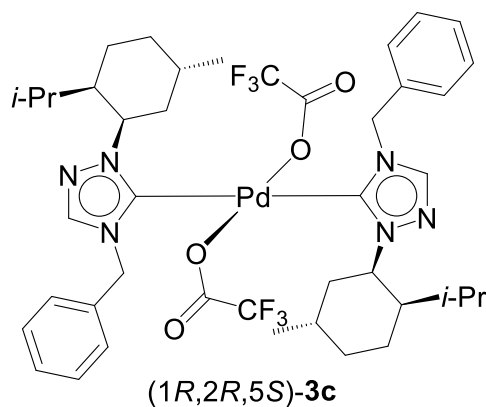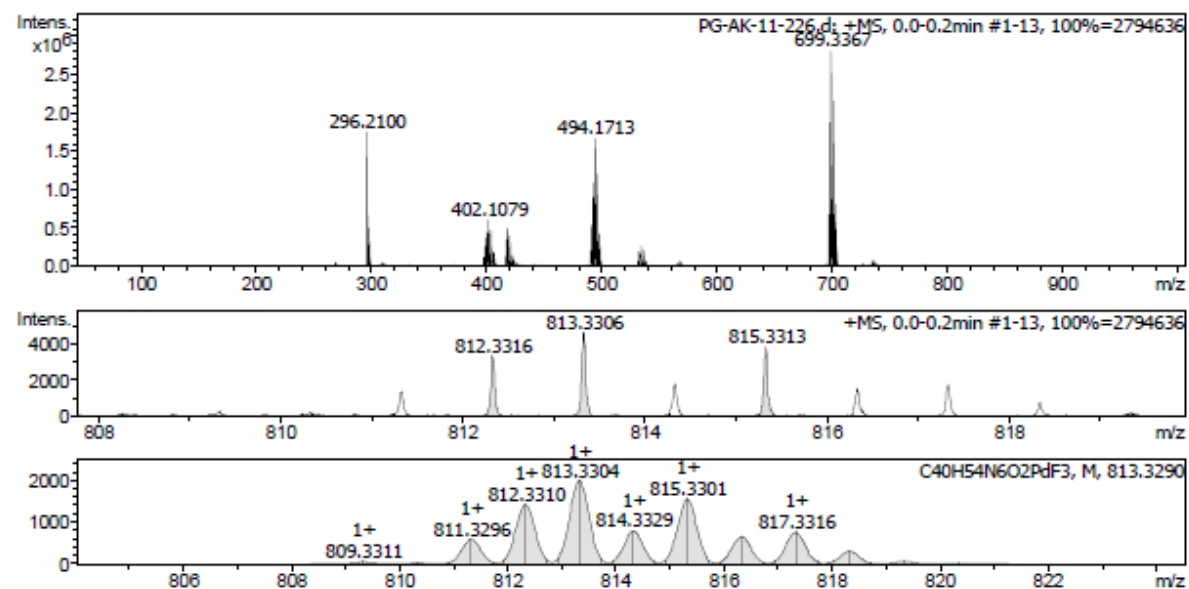

| Meas. m/z | # | Ion Formula    | m/z      | err [ppm] | mSigma | # Sigma | Score  | rdb  | e <sup>-</sup> Conf | N-Rule |
|-----------|---|----------------|----------|-----------|--------|---------|--------|------|---------------------|--------|
| 813.3306  | 1 | C40H54F3N6O2Pd | 813.3304 | -2.0      | 207.4  | 1       | 100.00 | 15.5 | even                | ok     |

**Figure S87.** High Resolution Mass Spectrometry (HRMS) data of 1R,2R,5S-3c.



## Eager 300 Report

Page: 1    Sample: PG-AK-11-226-1 (PG-AK-11-226-1)

Method Name : PGCP13102015  
 Method File : D:\CHNS-2015\PGCP13102015.mth  
 Chromatogram : PG-AK-11-226-1  
 Operator ID : CHANDNI  
 Analysed : 10/13/2015 14:29  
 Sample ID : PG-AK-11-226-1 (# 20)  
 Analysis Type : UnkNown (Area)

Company Name : C.E. Instruments  
 Printed : 10/13/2015 18:36  
 Instrument N. : Instrument #1  
 Sample weight : 1.044

Calib. method : using 'K Factors'

!!! Warning missing one or more peaks.

| Element Name | %       | Ret.Time | Area    | BC | Area ratio | K factor    |
|--------------|---------|----------|---------|----|------------|-------------|
| Nitrogen     | 8.7208  | 41       | 98597   | RS | 14.867610  | .108295E+07 |
| Carbon       | 53.7587 | 63       | 1465902 | RS | 1.000000   | .260680E+07 |
| Hydrogen     | 5.5882  | 178      | 402959  | RS | 3.637844   | .665180E+07 |
| Totals       | 68.0677 |          | 1967458 |    |            |             |

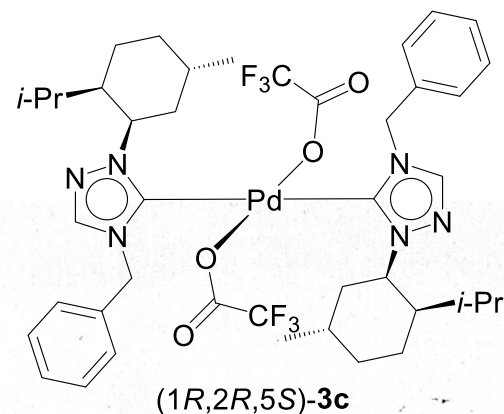

Figure S88. Elemental analysis data of (1R,2R,5S)-3c.

CENTRAL FACILITY LAB CHEMISTRY DEPT. IIT MUMBAI

Tuesday, 27-OCT-2015

This sample was measured on an Autopol IV, Serial #82083  
Manufactured by Rudolph Research Analytical, Hackettstown, NJ, USA.

Lot ID : pg

Set Temperature : 25.0

Time Delay : Disabled

Temperature Correction : OFF

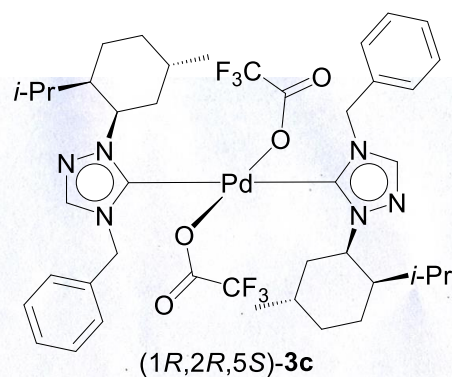

| <u>n</u> | <u>Average</u> | <u>Std.Dev.</u> | <u>Maximum</u> | <u>Minimum</u> |
|----------|----------------|-----------------|----------------|----------------|
| 5        | -44.424        | 0.0675          | -44.303        | -44.454        |

  

| <u>S.No</u> | <u>SampleID</u> | <u>Time</u> | <u>Result</u> | <u>Scale</u> | <u>OR °Arc</u> | <u>WLG</u> | <u>Lg.mm</u> | <u>Conc.</u> | <u>Temp.</u> |
|-------------|-----------------|-------------|---------------|--------------|----------------|------------|--------------|--------------|--------------|
| 1           | pg-ak-11-226-1  | 17:12:09    | -44.454       | SR           | -0.222         | 589        | 50.00        | 1.000        | 24.9         |
| 2           | pg-ak-11-226-1  | 17:12:16    | -44.454       | SR           | -0.222         | 589        | 50.00        | 1.000        | 24.9         |
| 3           | pg-ak-11-226-1  | 17:12:23    | -44.454       | SR           | -0.222         | 589        | 50.00        | 1.000        | 24.9         |
| 4           | pg-ak-11-226-1  | 17:12:29    | -44.454       | SR           | -0.222         | 589        | 50.00        | 1.000        | 24.9         |
| 5           | pg-ak-11-226-1  | 17:12:36    | -44.303       | SR           | -0.222         | 589        | 50.00        | 1.000        | 24.9         |

Figure S89. Specific rotation of (1R,2R,5S)-3c in CHCl<sub>3</sub>.

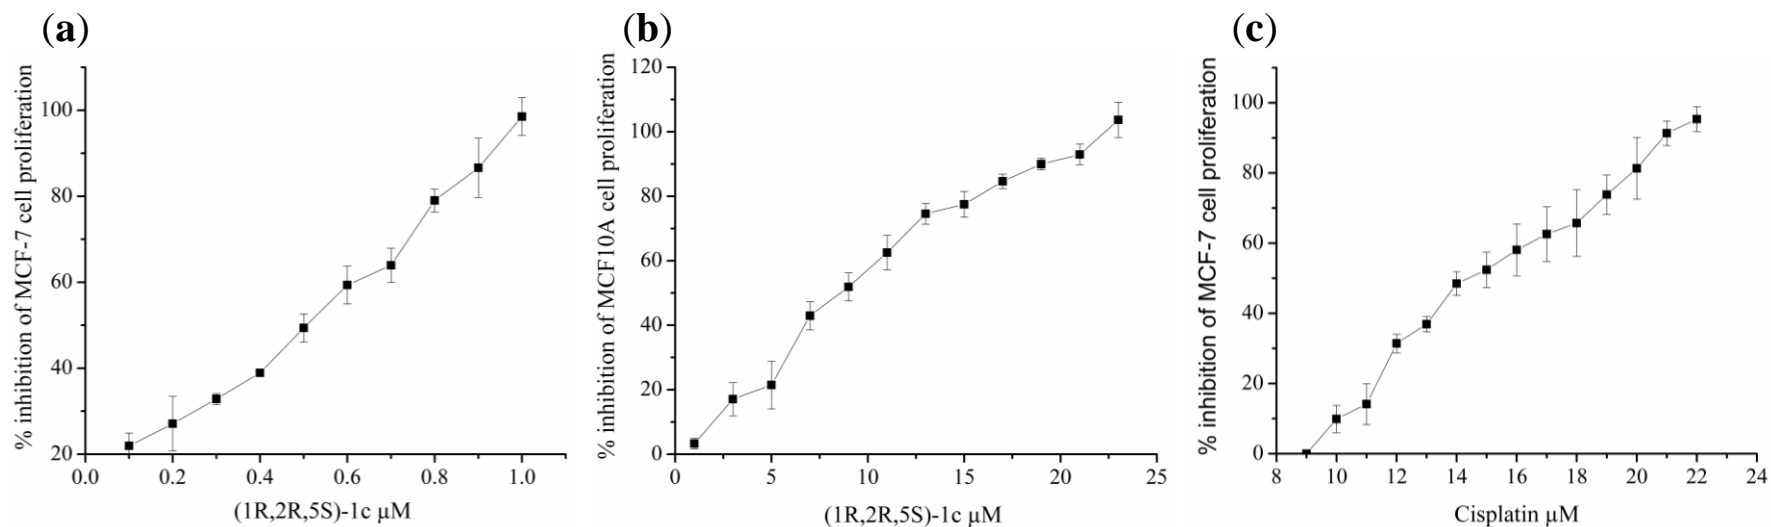

**Figure S90.** Antiproliferative activity of (1R,2R,5S)-1c against (a) MCF-7 and (b) MCF10A. (c) Antiproliferative activity of cisplatin against MCF7 measured using sulforhodamine B assay. The experiment was performed three times and average data was plotted. Error bars indicate standard deviation.

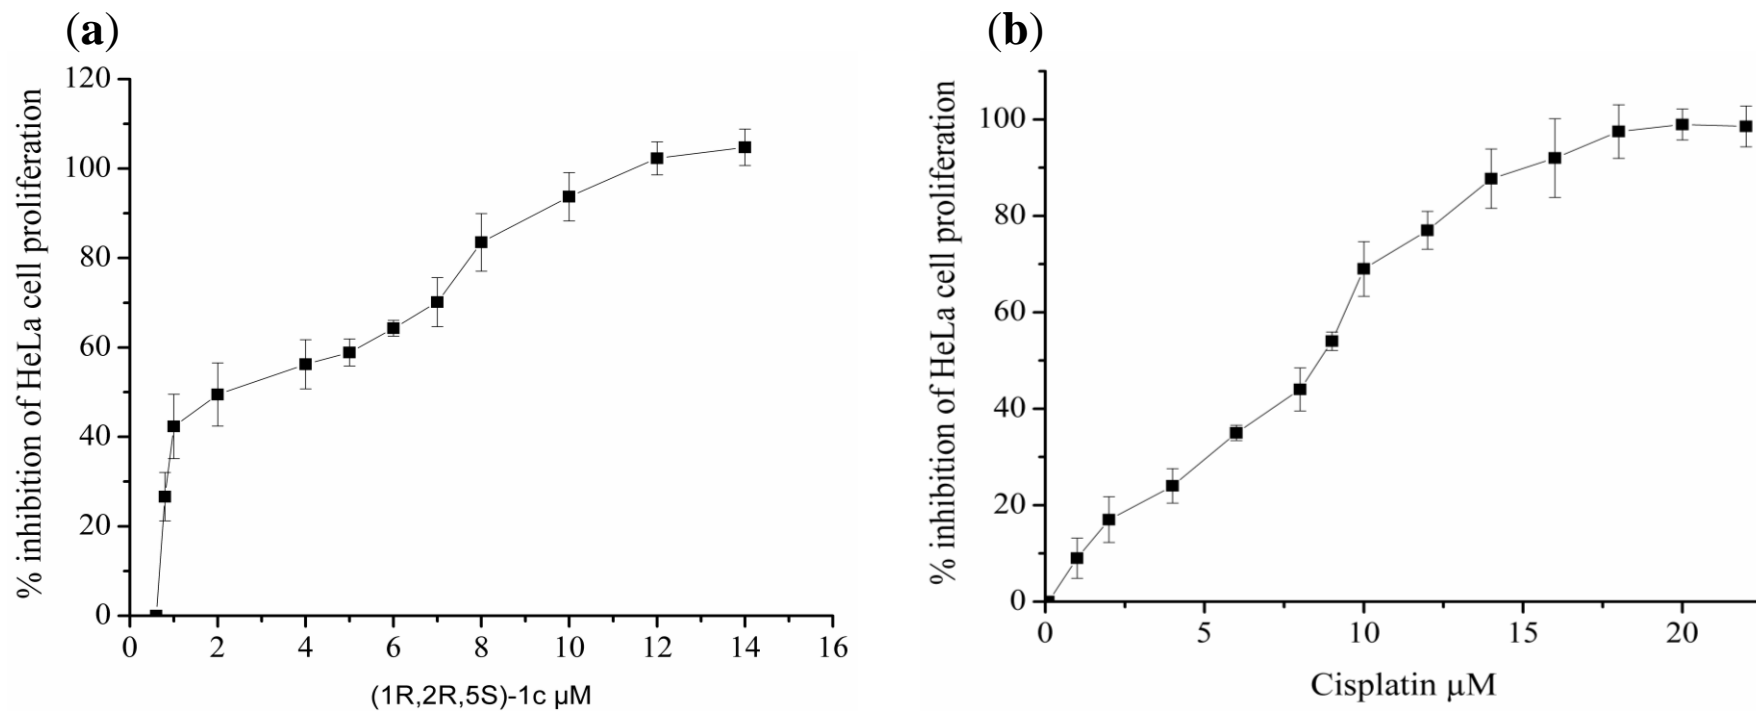

**Figure S91.** Antiproliferative activity of **(a)** (1R,2R,5S)-1c and **(b)** cisplatin against HeLa measured using sulforhodamine B assay.

The experiment was performed three times and average data was plotted. Error bars indicate standard deviation.

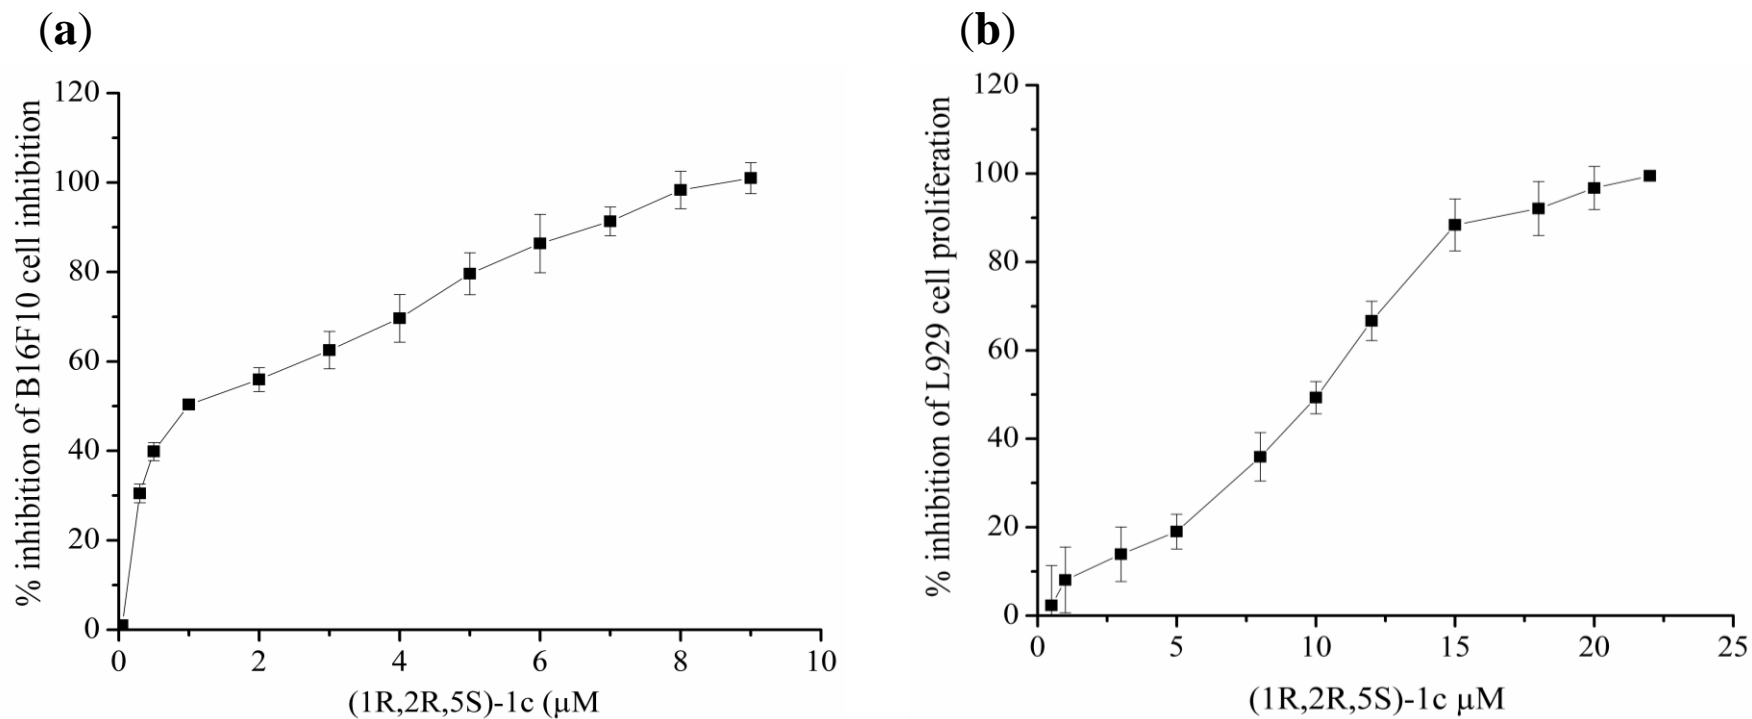

**Figure S92.** Antiproliferative activity of (1R,2R,5S)-1c against (a) B16F10 and (b) L929 measured using sulforhodamine B assay.

The experiment was performed three times and average data was plotted. Error bars indicate standard deviation.

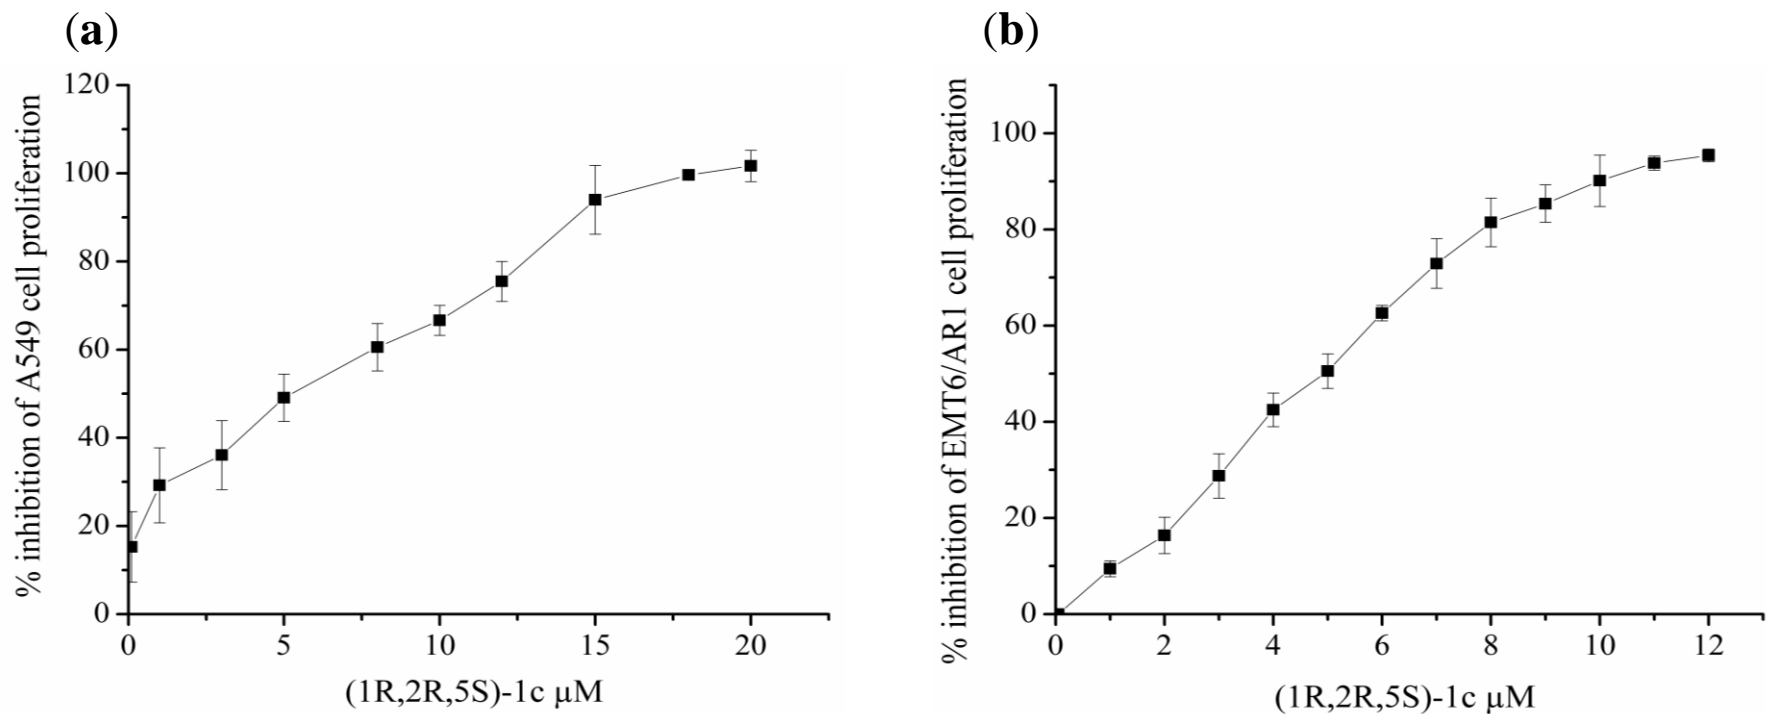

**Figure S93.** Antiproliferative activity of (1R,2R,5S)-1c against (a) A549 and (b) EMT6/AR1 cells measured using sulforhodamine B assay. The experiment was performed three times and average data was plotted. Error bars indicate standard deviation.

**Table S1.** X-ray crystallographic data for (1*R*,2*R*,5*S*)-(1-3)**b**, (1*S*,2*S*,5*R*)-2**b**, (1*S*,2*S*,5*R*)-1**c**, (1*R*,2*R*,5*S*)-1**c**, (1*S*,2*S*,5*R*)-3**c** and (1*R*,2*R*,5*S*)-3**c**.

| Compound                            | (1 <i>R</i> ,2 <i>R</i> ,5 <i>S</i> )-1 <b>b</b>                 | (1 <i>S</i> ,2 <i>S</i> ,5 <i>R</i> )-2 <b>b</b>                 | (1 <i>R</i> ,2 <i>R</i> ,5 <i>S</i> )-2 <b>b</b>                 | (1 <i>R</i> ,2 <i>R</i> ,5 <i>S</i> )-3 <b>b</b>                                 | (1 <i>S</i> ,2 <i>S</i> ,5 <i>R</i> )-1 <b>c</b>                               | (1 <i>R</i> ,2 <i>R</i> ,5 <i>S</i> )-1 <b>c</b>                                                 | (1 <i>S</i> ,2 <i>S</i> ,5 <i>R</i> )-3 <b>c</b>                               | (1 <i>R</i> ,2 <i>R</i> ,5 <i>S</i> )-3 <b>c</b>                               |
|-------------------------------------|------------------------------------------------------------------|------------------------------------------------------------------|------------------------------------------------------------------|----------------------------------------------------------------------------------|--------------------------------------------------------------------------------|--------------------------------------------------------------------------------------------------|--------------------------------------------------------------------------------|--------------------------------------------------------------------------------|
| Lattice                             | Triclinic                                                        | Triclinic                                                        | Triclinic                                                        | Triclinic                                                                        | Monoclinic                                                                     | Monoclinic                                                                                       | Monoclinic                                                                     | Monoclinic                                                                     |
| Formula                             | C <sub>28</sub> H <sub>50</sub> N <sub>6</sub> PdBr <sub>2</sub> | C <sub>30</sub> H <sub>50</sub> N <sub>6</sub> PdBr <sub>2</sub> | C <sub>30</sub> H <sub>50</sub> N <sub>6</sub> PdBr <sub>2</sub> | C <sub>76</sub> H <sub>108</sub> N <sub>12</sub> Pd <sub>2</sub> Br <sub>4</sub> | C <sub>32</sub> H <sub>50</sub> N <sub>6</sub> F <sub>6</sub> PdO <sub>4</sub> | C <sub>96</sub> H <sub>150</sub> N <sub>18</sub> F <sub>18</sub> Pd <sub>3</sub> O <sub>12</sub> | C <sub>42</sub> H <sub>54</sub> N <sub>6</sub> F <sub>6</sub> PdO <sub>4</sub> | C <sub>42</sub> H <sub>54</sub> N <sub>6</sub> F <sub>6</sub> PdO <sub>4</sub> |
| Formula weight                      | 736.96                                                           | 760.98                                                           | 760.97                                                           | 1722.18                                                                          | 803.18                                                                         | 2409.53                                                                                          | 927.31                                                                         | 927.31                                                                         |
| Space group                         | <i>P</i> 1                                                       | <i>P</i> 1                                                       | <i>P</i> 1                                                       | <i>P</i> 1                                                                       | <i>P</i> 2 <sub>1</sub>                                                        | <i>P</i> 2 <sub>1</sub>                                                                          | <i>P</i> 2 <sub>1</sub>                                                        | <i>P</i> 2 <sub>1</sub>                                                        |
| <i>a</i> /Å                         | 8.095(2)                                                         | 7.7060(15)                                                       | 7.715(4)                                                         | 11.565(3)                                                                        | 10.561(2)                                                                      | 18.899(5)                                                                                        | 9.702(3)                                                                       | 9.734(6)                                                                       |
| <i>b</i> /Å                         | 14.812(4)                                                        | 7.8581(16)                                                       | 7.865(4)                                                         | 13.039(3)                                                                        | 11.169(2)                                                                      | 11.212(3)                                                                                        | 20.111(6)                                                                      | 20.3275(10)                                                                    |
| <i>c</i> /Å                         | 15.641(4)                                                        | 14.256(3)                                                        | 14.299(7)                                                        | 13.719(3)                                                                        | 16.133(3)                                                                      | 27.511(7)                                                                                        | 11.874(4)                                                                      | 11.937(7)                                                                      |
| $\alpha$ /°                         | 66.874(12)                                                       | 101.44(3)                                                        | 101.479(8)                                                       | 98.396(4)                                                                        | 90.00                                                                          | 90.00                                                                                            | 90.00                                                                          | 90.00                                                                          |
| $\beta$ /°                          | 76.588(14)                                                       | 95.42(3)                                                         | 95.384(5)                                                        | 95.925(4)                                                                        | 92.303(3)                                                                      | 95.294(4)                                                                                        | 109.578(3)                                                                     | 109.531(8)                                                                     |
| $\gamma$ /°                         | 77.346(14)                                                       | 90.11(3)                                                         | 90.079(7)                                                        | 101.192(3)                                                                       | 90.00                                                                          | 90.00                                                                                            | 90.00                                                                          | 90.00                                                                          |
| <i>V</i> /Å <sup>3</sup>            | 1660.4(7)                                                        | 842.1(3)                                                         | 846.3(7)                                                         | 1989.1(8)                                                                        | 1901.4(6)                                                                      | 5805(3)                                                                                          | 2182.9(12)                                                                     | 2226.0(19)                                                                     |
| <i>Z</i>                            | 2                                                                | 1                                                                | 1                                                                | 1                                                                                | 2                                                                              | 2                                                                                                | 2                                                                              | 2                                                                              |
| Temperature (K)                     | 150(2)                                                           | 150(2)                                                           | 273                                                              | 150(2)                                                                           | 100(2)                                                                         | 150(2)                                                                                           | 100(2)                                                                         | 150(2)                                                                         |
| Radiation ( $\lambda$ , Å)          | 0.71075                                                          | 0.71073                                                          | 0.71070                                                          | 0.71075                                                                          | 0.7107                                                                         | 0.71075                                                                                          | 0.7107                                                                         | 0.71070                                                                        |
| $\rho$ (calcd.), g cm <sup>-3</sup> | 1.474                                                            | 1.501                                                            | 1.493                                                            | 1.438                                                                            | 1.403                                                                          | 1.379                                                                                            | 1.411                                                                          | 1.383                                                                          |
| $\theta$ max, deg.                  | 25.00                                                            | 32.4597                                                          | 29.13                                                            | 25.00                                                                            | 29.20                                                                          | 25.00                                                                                            | 29.14                                                                          | 25.00                                                                          |
| No. of data                         | 11225                                                            | 7372                                                             | 5340                                                             | 13098                                                                            | 6953                                                                           | 18768                                                                                            | 5437                                                                           | 7729                                                                           |
| No. of parameters                   | 683                                                              | 358                                                              | 352                                                              | 859                                                                              | 450                                                                            | 1348                                                                                             | 538                                                                            | 538                                                                            |
| <i>R</i> <sub>1</sub>               | 0.0258                                                           | 0.0373                                                           | 0.0553                                                           | 0.0369                                                                           | 0.0397                                                                         | 0.0719                                                                                           | 0.0571                                                                         | 0.0763                                                                         |
| <i>wR</i> <sub>2</sub>              | 0.0529                                                           | 0.0670                                                           | 0.1204                                                           | 0.0823                                                                           | 0.0793                                                                         | 0.1488                                                                                           | 0.0925                                                                         | 0.1545                                                                         |
| GOF                                 | 0.892                                                            | 0.929                                                            | 1.151                                                            | 1.086                                                                            | 1.030                                                                          | 1.057                                                                                            | 0.857                                                                          | 1.044                                                                          |
| Flack                               | 0.007(5)                                                         | 0.009(6)                                                         | 0.941(17)                                                        | 0.015(6)                                                                         | -0.035(14)                                                                     | -0.02(2)                                                                                         | -0.03(4)                                                                       | 0.05(4)                                                                        |

**Table S2.** Anticancer activity of chiral Pd–NHC complexes, *(1S,2S,5R)*-(**1–3**)**b** and *(1R,2R,5S)*-(**1–3**)**b**, *(1S,2S,5R)*-(**1, 3**)**c** and *(1R,2R,5S)*-(**1,3**)**c**, against MCF-7 cells.

| S. No. | compound                                                                                                    | $[\alpha]_D^{25}$ | IC <sub>50</sub> (μM) | compound                                                                                                      | $[\alpha]_D^{25}$ | IC <sub>50</sub> (μM) |
|--------|-------------------------------------------------------------------------------------------------------------|-------------------|-----------------------|---------------------------------------------------------------------------------------------------------------|-------------------|-----------------------|
| 1      | 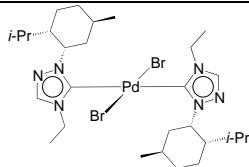<br><b>(1S,2S,5R)-1b</b>   | – 29.4            | 2.2 ± 0.1             | <br><b>(1R,2R,5S)-1b</b>   | + 29.8            | 2.3 ± 1               |
| 2      | <br><b>(1S,2S,5R)-2b</b>   | – 41.7            | ≈ 10                  | <br><b>(1R,2R,5S)-2b</b>   | + 39.4            | ≈ 10                  |
| 3      | <br><b>(1S,2S,5R)-3b</b>   | – 45.2            | > 10                  | <br><b>(1R,2R,5S)-3b</b>   | + 45.0            | > 10                  |
| 4      | <br><b>(1S,2S,5R)-1c</b>  | + 47.8            | 0.7 ± 0.005           | <br><b>(1R,2R,5S)-1c</b>  | – 48.0            | 0.55 ± 0.02           |
| 5      | <br><b>(1S,2S,5R)-3c</b> | + 40.2            | >10                   | <br><b>(1R,2R,5S)-3c</b> | – 44.4            | > 10                  |

Data are average IC<sub>50</sub> values from three independent set of experiments and ± indicates S.D.



**Table S3.** Anticancer activity of chiral Pd–NHC complexes (*1S,2S,5R*)-**1c** and (*1R,2R,5S*)-**1c**, against MCF-7 and HeLa cells in comparison to cisplatin.

| S. No. | compound                                                                                                                        | MCF-7<br>IC <sub>50</sub> (μM) | Hela<br>IC <sub>50</sub> (μM) |
|--------|---------------------------------------------------------------------------------------------------------------------------------|--------------------------------|-------------------------------|
| 1      | 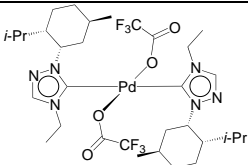<br><b>(1<i>S</i>,2<i>S</i>,5<i>R</i>)-1c</b> | 0.7 ± 0.005                    | 2.6 ± 1.6                     |
| 2      | <br><b>(1<i>R</i>,2<i>R</i>,5<i>S</i>)-1c</b> | 0.55 ± 0.02                    | 2.3 ± 1                       |
| 3      | cisplatin                                                                                                                       | 14.9 ± 0.4                     | 8.5 ± 0.7                     |

Data are average IC<sub>50</sub> values from three independent set of experiments and ± indicates S.D.

**Table S4.** Anticancer activity of the most potent complex (*1R,2R,5S*)-**1c** against various cancer cell lines.

| compound                                                                                                            | IC <sub>50</sub> (μM) values |                           |                       |                         |                                                     |
|---------------------------------------------------------------------------------------------------------------------|------------------------------|---------------------------|-----------------------|-------------------------|-----------------------------------------------------|
|                                                                                                                     | MCF-7<br>(breast cancer)     | HeLa<br>(cervical cancer) | A549<br>(lung cancer) | B16F10<br>(skin cancer) | EMT6/AR1<br>(multidrug resistant<br>mammary cancer) |
| 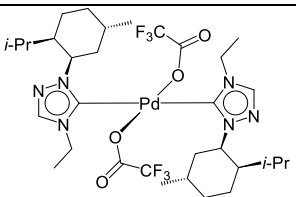<br>( <i>1R,2R,5S</i> )- <b>1c</b> | 0.55 ± 0.02                  | 2.3 ± 1                   | 5.7 ± 1.6             | 1.3 ± 0.4               | 4.8 ± 0.3                                           |

Data are average IC<sub>50</sub> values from three independent set of experiments and ± indicates S.D.

**Table S5.** IC<sub>50</sub> values of complex (*1R,2R,5S*)-**1c** against MCF-7 and B16F10 in comparison to their respective noncancerous counterparts MCF10A and L929.

| compound                                                                                                             | MCF-7                 | MCF10A                | B16F10                | L929                  |
|----------------------------------------------------------------------------------------------------------------------|-----------------------|-----------------------|-----------------------|-----------------------|
|                                                                                                                      | IC <sub>50</sub> (μM) | IC <sub>50</sub> (μM) | IC <sub>50</sub> (μM) | IC <sub>50</sub> (μM) |
| 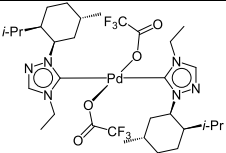 <p>(<i>1R,2R,5S</i>)-<b>1c</b></p> | 0.55 ± 0.02           | 8.6 ± 0.9             | 1.3 ± 0.4             | 10.5 ± 0.2            |

Data are average IC<sub>50</sub> values from three independent set of experiments and ± indicates S.D.
